# Supplementary material for: Associations of Observational and Genetically Determined Caffeine Intake With Coronary Artery Disease and Diabetes Mellitus
Source: PubMed Central journal article supplement — J Am Heart Assoc. 2020 Dec 8;9(24):e016808. doi: 10.1161/JAHA.120.016808 (PMC7955399; doi:10.1161/jaha.120.016808), 2020-12-08

# **Supplemental Material**

## Data S1.

### Supplemental Methods

#### UK Biobank participants

The study design and population of the UK Biobank study have been described in detail previously<sup>20</sup>. Briefly, between 2006 and 2010 over 500,000 participants aged 40-69 years from the general population were recruited at 22 assessment centers in the United Kingdom. Participants provided information on demographic, lifestyle, and other potentially health-related aspects through interviews, questionnaires, physical measurements as well as blood and urine samples<sup>20</sup>. All participants provided informed consent for the study at their first visit to the assessment center by agreeing to all individual statements of the consent form and providing their signature on an electronic pad<sup>21</sup>. The UK Biobank study has approval from the North West Multi-centre Research Ethics Committee for the UK, from the National Information Governance Board for Health & Social Care for England and Wales, and from the Community Health Index Advisory Group for Scotland<sup>22</sup>.

#### Ascertainment of coffee and tea intake

During the first visit to the assessment center, daily coffee and tea intake were assessed by asking participants *"How many cups of coffee do you drink each day? (Include decaffeinated coffee)"* and *"How many cups of tea do you drink each day? (Include black and green tea)"*.

Participants were asked to provide the average number of cups of either beverage they drink daily, based on their intake over the last year. We excluded participants who answered with *"Less than one"*, *"Do not know"* or *"Prefer not to answer"*. Participants who indicated to drink more than 10 cups of coffee or 20 cups of tea daily were asked to confirm their input. In addition, coffee drinkers were asked what type of coffee they usually drink, to which they could answer *"Decaffeinated coffee (any type)"*, *"Instant coffee"*, *"Ground coffee (include espresso, filter etc)"*, *"Other type of coffee"*, *"Do not know"* or *"Prefer not to answer"*. Amongst coffee drinkers we additionally excluded those who did not provide information on the type of coffee they usually drink. Coffee and tea intake were truncated at 20 cups per day.

Decaffeinated coffee was considered to contain 3 mg of caffeine per cup, instant coffee 60 mg, ground coffee 85 mg, and tea 30 mg<sup>23</sup>. Combined caffeine intake from both coffee and tea was calculated as the sum of the daily caffeine intake from coffee and tea from individuals who provided data on both.

#### CAD and T2D prevalence and incidence in the UK Biobank

Prevalence and incidence of CAD and T2D within UK Biobank were captured using self-reported data collected using the baseline-questionnaires and verbal interviews as per prior analysis<sup>24</sup>. Diagnoses were additionally captured using the Hospital Episode Statistics "Spell and Episode" category, which contains data on diagnoses made during hospital in-patient stay. We used both main and secondary diagnoses, coded according to the International Classification of Diseases (ICD) versions 9 and 10<sup>25</sup>. For CAD, we used ICD-9 codes 410, 412 and 414, and ICD-10 codes I21-I25, Z951 and Z955. For T2D, we used ICD-9 code 250 and ICD-10 codes E10-E14. In addition we used surgical procedures that were recorded according to the Office of Population, Censuses and Surveys: Classification of Interventions and Procedures (OPCS), version 4 coding<sup>26</sup>. For CAD, OPCS-4 codes K40-K46, K49, K50 and K75 were used. Incident cases that were based on self-reported diagnoses during follow-up visits were included only if there were no events recorded according to ICD-9/ICD-10/OPCS 4 and only if the participant did not report this in the previous visit. If the participant was the same age as the reported age of diagnosis, the median date between the visit and their birthday was taken as date of event, and if the age of diagnosis was before the participants current age we took the median date of the year of the reported age of diagnosis counted from the participants birthday. If age of diagnosis was not available we took the median date between the visit of the first self-reported diagnosis and the previous visit. Participants with CAD or T2D at inclusion were excluded for the observational analyses of the respective disease. Follow-up for incident CAD, T2D and death due to these conditions was from inclusion until March 31, 2017 for participants from England, February 29, 2016 for Wales, and October 31, 2016 for Scotland.

#### Genotyping and imputation in UK Biobank

The genotyping process and arrays used in UK Biobank have been described elsewhere in more detail. Briefly, participants were genotyped using the custom Affymetrix UK Biobank Lung Exome Variant Evaluation (UK BiLEVE) Axiom<sup>TM</sup> (N=49,950) or Affymetrix UK Biobank Axiom<sup>TM</sup> array (N=438,427)<sup>27,28</sup>. The UK BiLEVE Axiom<sup>TM</sup> and UK Biobank Axiom<sup>TM</sup> arrays respectively have 807,411 and 820,927 single-nucleotide polymorphism (SNP), insertion and deletion markers with >95% common content<sup>28</sup>. Participants genotyped using the UK BiLEVE array were selected based on smoking behavior (heavy smokers with a mean 35 pack-years and

never smokers)<sup>27</sup>. Genomic quality control of samples and variants, as well as imputation was performed by the Wellcome Trust Centre for Human Genetics, based on merged UK10K and 1000 Genomes phase 3 panels<sup>27,29</sup>. Participants were excluded if there was a mismatch between genetic and reported sex, if participants had high missingness or excess heterozygosity, or were not of white British descent. In total, from the 502,525 UK Biobank participants, 1,332 did not pass genomic quality control and 91,069 were not of white British descent.

### Genetic analyses

All genetic analyses were adjusted for age, sex, genotyping array, and the first 30 principal components (PCs) to adjust for population stratification. We performed separate GWAS for inverse rank normalized combined caffeine intake, caffeine from coffee, and caffeine from tea. GWAS were performed using BOLT-LMM v2.3.1, which uses a linear mixed model that corrects for population structure and cryptic relatedness<sup>30</sup>. In total, 19,400,838 SNPs were included in the GWAS. To obtain a set of independent SNPs per phenotype, SNPs with  $P < 5 \times 10^{-8}$  were clumped together based on linkage disequilibrium (LD)  $R^2 > 0.005$  and 5-Mb distance using the clumping procedure integrated in PLINK version 1.9. To account for multiple testing of the 3 GWAS, we considered only SNPs with Bonferroni corrected  $P < 1.67 \times 10^{-8}$  (traditional GWAS significance threshold of  $5 \times 10^{-8}/3$ ) as statistically significant. This significance threshold is conservative, considering that our phenotypes are correlated with Spearman's rank correlation coefficients between phenotype pairs ranging from  $r = -0.33$  to 0.71 (**Table S1**).

For each phenotype we consequently identified the sentinel SNP (defined as the most significant SNP in a 5-Mb region at either side of the SNP) at each locus. A locus was defined as a 1-Mb region at either side of the sentinel SNP. Similar to how the sentinel SNP per locus per phenotype was identified, a single sentinel SNP with the lowest  $P$  value per locus was identified across the sentinel SNPs of all three phenotypes for general caffeine intake. SNPs were excluded if the minor allele frequency (MAF) was  $< 0.005$  or the INFO score was below 0.3.

### Identification of candidate genes

Candidate genes at each locus were prioritized based on 1) proximity, the nearest protein coding gene and any additional gene within 10kb of the sentinel SNP; 2) Data-driven Expression-Prioritized Integration for Complex Traits (DEPICT); and 3) expression quantitative trait locus (eQTL) genes in cis analyses. Summary information about candidate causal genes was obtained through queries in GeneCards.

### DEPICT analyses

DEPICT has been described in detail previously<sup>31</sup>. Briefly, DEPICT systematically prioritizes likely causal genes at associated loci, and identifies tissue and cell types where genes from associated loci are highly expressed. DEPICT.v1.beta version rel194 1KG imputed GWAS was obtained from <https://data.broadinstitute.org/mpg/depict/>. DEPICT was run with default settings, using all variants at  $P < 1.0 \times 10^{-5}$ . Tissue and cell type enrichment found by DEPICT at FDR  $< 0.05$  were considered significant.

### eQTL analyses

We applied a summary-data-based MR (SMR) approach in cis-eQTL data repositories from Genotype-Tissue Expression (GTEx) version 7<sup>32</sup>, Brain-eMeta eQTL<sup>33</sup>, and blood eQTL from Westra<sup>34</sup> and CAGE<sup>35</sup>. SMR, by default, was performed only in cis-regions. eQTL genes were considered as candidate causal genes if the top associated eQTL SNP achieved  $P < 2.7 \times 10^{-7}$  ( $P = 0.05/n_{SMRtests} = [\text{combined caffeine intake} = 187,748; \text{caffeine from coffee} = 181,931; \text{caffeine from tea} = 182,971]$ ), passed the Heterogeneity In Dependent Instruments (HEIDI) test with  $P > 0.05$ , and were LD buddies ( $R^2 > 0.8$ ) with the queried caffeine intake SNP. HEIDI distinguishes pleiotropy from linkage by testing for heterogeneity in SMR estimates of SNPs in LD with the top-associated cis-eQTL. In the case of pleiotropy, the gene expression and the trait of interest share the same SNP. Software for the SMR/HEIDI tests was downloaded from <http://cnsgenomics.com/software/smr/#Download> and eQTL catalogues from <http://cnsgenomics.com/software/smr/#eQTLsummarydata>.

### Associations between genetics with outcomes

To gain insight in the potentially causal relationship between caffeine intake and CAD, we performed MR analyses on summary statistics data from the CARDIoGRAMplusC4D consortium as provided by Nikpay *et al.* in 123,504 controls and 60,801 (33.0%) cases<sup>36</sup>. The CARDIoGRAMplusC4D data was obtained through MR Base. To assess the potentially causal relationship with T2D, MR analyses were performed on summary statistics data from the DIAGRAM consortium as reported by Scott *et al.*, which included 132,532 controls and 26,676 cases (16.8%)<sup>37</sup>. Summary statistics data for DIAGRAM was downloaded from <http://www.diagram-consortium.org/downloads.html>. Analyses were performed per caffeine intake trait using the lead SNPs at  $P < 1.67 \times 10^{-8}$ . Proxies based on highest LD and position were used for SNPs that were not available in CARDIoGRAMplusC4D or DIAGRAM. SNPs were only replaced with proxies with  $R^2 > 0.8$ , and were otherwise excluded from the MR analyses if no eligible proxies were available. SNP effects were harmonized across the

studies using the built-in function in the MR Base R package (*TwoSampleMR*). The association between genetically determined higher caffeine intake and CAD or T2D was assessed using a fixed-effects inverse-variance weighted (IVW) meta-analysis method which combines MR estimates for individual SNPs with the outcome. Odds ratios (OR) with 95% CI are presented for the MR outcomes. To maximize the likelihood of reporting true findings,  $\alpha$  was set at 0.005 rather than 0.05<sup>39</sup>. Associations with  $P < 0.05$  were considered suggestively significant.

### **Weak instrument bias**

The strength of the instruments (SNPs) per phenotype was assessed using the F-statistic, calculated as  $F = R^2(n_{\text{sample}} - 2) / (1 - R^2)$ , where  $R^2$  is the proportion of variability in caffeine intake. An F-statistic  $> 10$  indicates relatively low risk of weak instrument bias in MR analyses<sup>40</sup>, which is essential to prevent violation of the 'NO Measurement Error' assumption. Additionally, potential weak instrument bias in MR-Egger regression analyses was assessed by calculating  $I^2_{\text{GX}}$ , which is the true variance of the SNP-exposure association.  $I^2_{\text{GX}} > 95\%$  indicates small uncertainty in the SNP-exposure association estimates and was considered low risk of measurement error<sup>41</sup>.

### **Analyses for pleiotropy in MR**

In MR analyses, pleiotropy indicates multiple effects are exerted by a SNP, which could violate the assumption in MR analysis that the SNP only influences the outcome through the exposure of interest (here, caffeine). We applied multiple tests to investigate potential pleiotropy in our analyses. First,  $I^2$  index and Cochran's Q statistic were determined. An  $I^2$  index  $> 25\%$  and Cochran's Q  $P < 0.05$  were considered indicative of heterogeneity and thus pleiotropy<sup>42</sup>. In case of evidence of heterogeneity, each instrument can be allowed to have a (balanced) pleiotropic effect and a random effects IVW method can be applied<sup>43</sup>. MR-Egger, which in contrast to the IVW method assumes pleiotropic effects of the SNPs on the outcome are independent of their association with the exposure (caffeine), was performed as an additional test. If the MR-Egger intercept is zero, tested using  $P > 0.05$ , this indicated there was evidence for absent pleiotropic bias, whereas deviations from zero indicate horizontal pleiotropy across the SNPs. If the InSIDE assumption, which assumes the association of SNPs with the exposure are independent of the direct pleiotropic effects of the SNP on the outcome, is satisfied, the coefficient from the MR-Egger regression is an estimate of the causal effect. We further assessed heterogeneity within the MR-Egger analysis using the Rucker's Q' statistic, and tested whether this differed ( $P < 0.05$ ) from Cochran's Q (Q-Q'). A significant difference indicates the MR-Egger is the preferred method to study the association between the exposure and the outcome<sup>43</sup>. Pleiotropy was further tested using the MR pleiotropy residual sum and outlier (MR-PRESSO) test<sup>44</sup>, which compares the residuals for each SNP in the zero-intercept regression line of the SNP-outcome estimate with the SNP-exposure estimate in the absence of pleiotropy. Hereby, pleiotropic effects can be detected and outliers identified. MR-PRESSO then re-analyses the association without the outliers, correcting for potential pleiotropic effects<sup>44</sup>. MR-Steiger filtering was performed to remove variants which are stronger associated with the outcome than the exposure<sup>45</sup>. To this end, the  $R^2$  for the exposure and outcome is calculated, after which variants with significantly lower  $R^2$  for the exposure than for the outcome are removed.

### **Sensitivity analyses in MR**

We additionally performed several sensitivity analyses. First, weighted median MR analysis was performed, which allows up to 50% of the instruments to be invalid, in contrast to regular IVW analysis where absence of pleiotropic effects of the instruments is assumed. Next, weighted mode-based estimator MR analyses were performed to allow even larger numbers of SNPs to be invalid, but rather takes the overall MR result from the greatest number of valid SNPs with similar MR estimates<sup>46</sup>. The R packages *TwoSampleMR* version 0.4.22 (<https://mrcieu.github.io/TwoSampleMR/>) and MR-PRESSO version 1.0 were used for the MR analyses.

## **Data sources**

### **UK Biobank**

This research has been conducted using the UK Biobank Resource under Application Number 12006 and 15031.

### **CARDIoGRAMplusC4D Consortium**

We used summary statistics data available in MR Base from the Coronary Artery Disease Genome wide Replication and Meta-analysis plus The Coronary Artery Disease (CARDIoGRAMplusC4D) consortium as published by Nikpay *et al.* in 2015<sup>36</sup>. The CARDIoGRAMplusC4D cohort consisted of 123,504 controls and 60,801 (33.0%) coronary artery disease cases.

### **DIAGRAM consortium**

We used summary statistics data from the DIABetes Genetics Replication And Meta-analysis (DIAGRAM) consortium as published by Scott *et al.* in 2017<sup>37</sup>, downloaded from <http://www.diagram-consortium.org/downloads.html>. The DIAGRAM cohort consisted of 132,532 controls and 26,676 (16.8%) type 2 diabetes cases.

**Table S1. Spearman's rank correlation between phenotypical caffeine intake traits**

|                                   | <b>Combined daily caffeine intake</b> | <b>Daily caffeine intake from coffee</b> | <b>Daily caffeine intake from tea</b> |
|-----------------------------------|---------------------------------------|------------------------------------------|---------------------------------------|
| Combined daily caffeine intake    | 1                                     |                                          |                                       |
| Daily caffeine intake from coffee | 0.7147                                | 1                                        |                                       |
| Daily caffeine intake from tea    | 0.3071                                | -0.3319                                  | 1                                     |

Caffeine intake in mg/day

**Table S2. Baseline characteristics for individuals included in the GWAS on combined caffeine intake, caffeine from coffee, or caffeine from tea**

| <b>Characteristic</b>                         | <b>Combined Caffeine</b> | <b>Caffeine from Coffee</b> | <b>Caffeine from Tea</b> |
|-----------------------------------------------|--------------------------|-----------------------------|--------------------------|
| Total, n                                      | 362,316                  | 373,522                     | 395,866                  |
| Age, mean (SD), y                             | 56.94 (8.00)             | 56.92 (8.01)                | 56.94 (7.99)             |
| Female                                        | 195,754 (54.0%)          | 201,463 (53.9%)             | 214,395 (54.2%)          |
| Daily caffeine intake, median (IQR), mg/day   |                          |                             |                          |
| Combined caffeine                             | 205 (120-290)            | 205 (120-290)               | 205 (120-290)            |
| Caffeine from coffee                          | 60 (3-180)               | 85 (3-180)                  | 60 (3-180)               |
| Caffeine from tea                             | 90 (60-150)              | 90 (60-150)                 | 90 (60-150)              |
| Blood pressure, mean (SD), mm Hg              |                          |                             |                          |
| Systolic                                      | 133.75 (17.94)           | 133.76 (17.93)              | 133.73 (17.95)           |
| Diastolic                                     | 82.13 (8.54)             | 82.14 (8.54)                | 82.12 (8.54)             |
| Active smoker                                 |                          |                             |                          |
| No                                            | 325,226 (89.8%)          | 335,025 (89.7%)             | 355,938 (89.9%)          |
| Yes                                           | 37,090 (10.2%)           | 38,497 (10.3%)              | 39,928 (10.1%)           |
| BMI, mean (SD), kg/m <sup>2</sup>             | 27.43 (4.74)             | 27.43 (4.75)                | 27.41 (4.75)             |
| Weekly alcohol intake, median (IQR), UK units | 9.60 (1.96-20.20)        | 9.60 (1.96-20.20)           | 9.60 (1.96-20.00)        |
| Hypertension                                  |                          |                             |                          |
| No                                            | 250,114 (69.0%)          | 257,966 (69.1%)             | 272,994 (69.0%)          |
| Yes                                           | 112,202 (31.0%)          | 115,556 (30.9%)             | 122,872 (31.0%)          |
| Hyperlipidemia                                |                          |                             |                          |
| No                                            | 291,798 (80.5%)          | 300,872 (80.6%)             | 318,841 (80.5%)          |
| Yes                                           | 70,518 (19.5%)           | 72,650 (19.4%)              | 77,025 (19.5%)           |

Combined caffeine intake was calculated as the sum of caffeine intake from coffee and tea. Body mass index calculated as weight in kilograms divided by height in meters squared

**Table S3. Baseline characteristics per 60 mg of combined caffeine intake**

| Characteristic                                | 0 mg              | 1-60 mg           | 61-120 mg         | 121-180 mg        | 181-240 mg        | 241-300 mg         | 301-360 mg         | >360 mg            |
|-----------------------------------------------|-------------------|-------------------|-------------------|-------------------|-------------------|--------------------|--------------------|--------------------|
| Total, n                                      | 8,845             | 26,279            | 55,733            | 81,959            | 69,745            | 51,542             | 31,198             | 37,015             |
| Age, mean (SD), y                             | 53.61 (8.33)      | 56.05 (8.28)      | 56.91 (8.12)      | 57.33 (7.99)      | 57.52 (7.85)      | 57.20 (7.84)       | 56.87 (7.80)       | 56.19 (7.94)       |
| Female                                        | 5,673 (64.1%)     | 16,185 (61.6%)    | 32,673 (58.6%)    | 46,430 (56.7%)    | 37,917 (54.4%)    | 26,289 (51.0%)     | 14,948 (47.9%)     | 15,639 (42.3%)     |
| Daily caffeine intake, median (IQR), mg/day   |                   |                   |                   |                   |                   |                    |                    |                    |
| Combined caffeine                             | 0 (0-0)           | 33 (15-60)        | 96 (90-120)       | 159 (150-180)     | 230 (210-240)     | 285 (270-300)      | 345 (330-360)      | 450 (420-540)      |
| Caffeine from coffee                          | 0 (0-0)           | 6 (0-15)          | 3 (0-60)          | 18 (0-85)         | 120 (60-170)      | 170 (120-240)      | 240 (170-300)      | 340 (255-425)      |
| Caffeine from tea                             | 0 (0-0)           | 30 (0-30)         | 90 (60-90)        | 120 (60-150)      | 120 (60-180)      | 120 (60-180)       | 90 (60-180)        | 120 (30-210)       |
| Blood pressure, mean (SD), mm Hg              |                   |                   |                   |                   |                   |                    |                    |                    |
| Systolic                                      | 128.79 (17.62)    | 132.38 (18.11)    | 133.68 (18.19)    | 133.96 (18.18)    | 134.20 (17.91)    | 134.26 (17.72)     | 134.08 (17.56)     | 133.72 (17.44)     |
| Diastolic                                     | 80.92 (8.87)      | 81.70 (8.70)      | 82.03 (8.58)      | 82.05 (8.56)      | 82.13 (8.47)      | 82.35 (8.44)       | 82.43 (8.50)       | 82.49 (8.50)       |
| Active smoker                                 |                   |                   |                   |                   |                   |                    |                    |                    |
| No                                            | 8,235 (93.1%)     | 24,301 (92.5%)    | 52,154 (93.6%)    | 75,786 (92.5%)    | 63,530 (91.1%)    | 45,656 (88.6%)     | 26,631 (85.4%)     | 28,933 (78.2%)     |
| Yes                                           | 610 (6.9%)        | 1,978 (7.5%)      | 3,579 (6.4%)      | 6,173 (7.5%)      | 6,215 (8.9%)      | 5,886 (11.4%)      | 4,567 (14.6%)      | 8,082 (21.8%)      |
| BMI, mean (SD), kg/m <sup>2</sup>             | 27.84 (5.77)      | 27.87 (5.23)      | 27.32 (4.82)      | 27.28 (4.69)      | 27.24 (4.57)      | 27.40 (4.53)       | 27.57 (4.65)       | 27.75 (4.75)       |
| Weekly alcohol intake, median (IQR), UK units | 1.96 (1.00-12.40) | 6.90 (1.60-17.90) | 8.70 (1.96-19.20) | 9.60 (1.96-19.20) | 9.60 (2.00-20.20) | 10.80 (2.66-21.30) | 11.20 (2.90-22.40) | 11.20 (1.96-23.20) |
| Hypertension                                  |                   |                   |                   |                   |                   |                    |                    |                    |
| No                                            | 6,542 (74.0%)     | 17,598 (67.0%)    | 37,359 (67.0%)    | 55,634 (67.9%)    | 48,329 (69.3%)    | 36,266 (70.4%)     | 22,152 (71.0%)     | 26,234 (70.9%)     |
| Yes                                           | 2,303 (26.0%)     | 8,681 (33.0%)     | 18,374 (33.0%)    | 26,325 (32.1%)    | 21,416 (30.7%)    | 15,276 (29.6%)     | 9,046 (29.0%)      | 10,781 (29.1%)     |
| Hyperlipidemia                                |                   |                   |                   |                   |                   |                    |                    |                    |
| No                                            | 7,646 (86.4%)     | 20,773 (79.0%)    | 44,522 (79.9%)    | 65,591 (80.0%)    | 56,254 (80.7%)    | 41,857 (81.2%)     | 25,345 (81.2%)     | 29,810 (80.5%)     |
| Yes                                           | 1,199 (13.6%)     | 5,506 (21.0%)     | 11,211 (20.1%)    | 16,368 (20.0%)    | 13,491 (19.3%)    | 9,685 (18.8%)      | 5,853 (18.8%)      | 7,205 (19.5%)      |

Combined caffeine intake was calculated as the sum of caffeine intake from coffee and tea. Body mass index calculated as weight in kilograms divided by height in meters squared



**Table S4. Baseline characteristics per 60 mg caffeine intake from coffee**

| Characteristic                                | 0 mg              | 1-60 mg           | 61-120 mg          | 121-180 mg         | 181-240 mg         | 24-300 mg1         | 301-360 mg         | >360 mg            |
|-----------------------------------------------|-------------------|-------------------|--------------------|--------------------|--------------------|--------------------|--------------------|--------------------|
| Total, n                                      | 85,680            | 100,079           | 61,866             | 49,884             | 22,315             | 24,478             | 15,473             | 13,747             |
| Age, mean (SD), y                             | 55.88 (8.15)      | 57.95 (7.83)      | 57.25 (7.97)       | 57.15 (7.92)       | 56.85 (7.90)       | 56.36 (7.97)       | 56.31 (7.91)       | 55.35 (8.00)       |
| Female                                        | 49,810 (58.1%)    | 59,014 (59.0%)    | 32,525 (52.6%)     | 25,331 (50.8%)     | 10,745 (48.2%)     | 11,382 (46.5%)     | 6,944 (44.9%)      | 5,712 (41.6%)      |
| Daily caffeine intake, median (IQR), mg/day   |                   |                   |                    |                    |                    |                    |                    |                    |
| Combined caffeine                             | 150 (90-180)      | 129 (72-183)      | 210 (175-240)      | 260 (210-300)      | 300 (240-360)      | 330 (300-375)      | 390 (360-450)      | 540 (480-630)      |
| Caffeine from coffee                          | 0 (0-0)           | 15 (6-60)         | 120 (85-120)       | 180 (170-180)      | 240 (240-240)      | 300 (255-300)      | 360 (340-360)      | 480 (425-595)      |
| Caffeine from tea                             | 150 (90-180)      | 90 (60-150)       | 90 (60-150)        | 90 (30-120)        | 60 (0-120)         | 60 (0-90)          | 30 (0-90)          | 30 (0-90)          |
| Blood pressure, mean (SD), mm Hg              |                   |                   |                    |                    |                    |                    |                    |                    |
| Systolic                                      | 132.74 (18.30)    | 133.78 (17.99)    | 134.17 (17.93)     | 134.13 (17.80)     | 135.10 (17.70)     | 134.02 (17.43)     | 134.24 (17.26)     | 133.47 (17.36)     |
| Diastolic                                     | 81.90 (8.68)      | 81.79 (8.46)      | 82.26 (8.53)       | 82.29 (8.45)       | 82.87 (8.58)       | 82.50 (8.48)       | 82.69 (8.46)       | 82.61 (8.58)       |
| Active smoker                                 |                   |                   |                    |                    |                    |                    |                    |                    |
| No                                            | 77,385 (90.3%)    | 92,972 (92.9%)    | 56,678 (91.6%)     | 45,213 (90.6%)     | 19,289 (86.4%)     | 20,972 (85.7%)     | 12,607 (81.5%)     | 9,909 (72.1%)      |
| Yes                                           | 8,295 (9.7%)      | 7,107 (7.1%)      | 5,188 (8.4%)       | 4,671 (9.4%)       | 3,026 (13.6%)      | 3,506 (14.3%)      | 2,866 (18.5%)      | 3,838 (27.9%)      |
| BMI, mean (SD), kg/m <sup>2</sup>             | 27.50 (5.01)      | 27.41 (4.70)      | 27.08 (4.58)       | 27.19 (4.54)       | 27.95 (4.69)       | 27.52 (4.64)       | 27.93 (4.87)       | 28.08 (4.98)       |
| Weekly alcohol intake, median (IQR), UK units | 6.40 (1.17-17.90) | 8.00 (1.96-17.60) | 11.20 (3.60-22.10) | 12.00 (4.80-22.70) | 11.50 (3.20-23.00) | 12.60 (4.43-23.50) | 12.30 (3.16-24.00) | 11.00 (1.96-23.90) |
| Hypertension                                  |                   |                   |                    |                    |                    |                    |                    |                    |
| No                                            | 58,289 (68.0%)    | 66,870 (66.8%)    | 43,294 (70.0%)     | 35,409 (71.0%)     | 15,610 (70.0%)     | 17,743 (72.5%)     | 10,957 (70.8%)     | 9,794 (71.2%)      |
| Yes                                           | 27,391 (32.0%)    | 33,209 (33.2%)    | 18,572 (30.0%)     | 14,475 (29.0%)     | 6,705 (30.0%)      | 6,735 (27.5%)      | 4,516 (29.2%)      | 3,953 (28.8%)      |
| Hyperlipidemia                                |                   |                   |                    |                    |                    |                    |                    |                    |
| No                                            | 69,397 (81.0%)    | 79,007 (78.9%)    | 50,233 (81.2%)     | 40,659 (81.5%)     | 18,025 (80.8%)     | 20,107 (82.1%)     | 12,464 (80.6%)     | 10,980 (79.9%)     |
| Yes                                           | 16,283 (19.0%)    | 21,072 (21.1%)    | 11,633 (18.8%)     | 9,225 (18.5%)      | 4,290 (19.2%)      | 4,371 (17.9%)      | 3,009 (19.4%)      | 2,767 (20.1%)      |

Combined caffeine intake was calculated as the sum of caffeine intake from coffee and tea. Body mass index calculated as weight in kilograms divided by height in meters squared

**Table S5. Baseline characteristics per 60 mg caffeine intake from tea**

| Characteristic                              | 0 mg              | 1-60 mg            | 61-120 mg         | 121-180 mg        | >180 mg           |
|---------------------------------------------|-------------------|--------------------|-------------------|-------------------|-------------------|
| Total, n                                    | 60,199            | 87,981             | 119,872           | 85,705            | 42,109            |
| Age, mean (SD), y                           | 55.81 (8.18)      | 56.63 (8.16)       | 57.49 (7.90)      | 57.29 (7.83)      | 56.94 (7.79)      |
| Female                                      | 33,935 (56.4%)    | 45,911 (52.2%)     | 65,987 (55.0%)    | 46,619 (54.4%)    | 21,943 (52.1%)    |
| Daily caffeine intake, median (IQR), mg/day |                   |                    |                   |                   |                   |
| Combined caffeine                           | 180 (12-300)      | 180 (72-270)       | 180 (120-270)     | 210 (162-270)     | 300 (240-385)     |
| Caffeine from coffee                        | 180 (12-300)      | 120 (15-240)       | 60 (3-170)        | 60 (0-120)        | 3 (0-85)          |
| Caffeine from tea                           | 0 (0-0)           | 60 (30-60)         | 90 (90-120)       | 150 (150-180)     | 240 (210-300)     |
| Blood pressure, mean (SD), mm Hg            |                   |                    |                   |                   |                   |
| Systolic                                    | 133.11 (17.83)    | 133.80 (17.94)     | 133.99 (17.99)    | 133.91 (18.03)    | 133.35 (17.84)    |
| Diastolic                                   | 82.25 (8.68)      | 82.21 (8.60)       | 82.02 (8.48)      | 82.10 (8.50)      | 82.01 (8.48)      |
| Active smoker                               |                   |                    |                   |                   |                   |
| No                                          | 52,157 (86.6%)    | 80,103 (91.0%)     | 110,804 (92.4%)   | 77,595 (90.5%)    | 35,279 (83.8%)    |
| Yes                                         | 8,042 (13.4%)     | 7,878 (9.0%)       | 9,068 (7.6%)      | 8,110 (9.5%)      | 6,830 (16.2%)     |
| BMI, mean (SD), kg/m <sup>2</sup>           | 28.16 (5.27)      | 27.25 (4.69)       | 27.15 (4.55)      | 27.37 (4.63)      | 27.48 (4.73)      |
| Weekly alcohol intake, log UK units         | 9.00 (1.96-20.60) | 11.20 (3.20-22.40) | 9.60 (2.06-19.80) | 8.90 (1.96-19.20) | 6.90 (1.17-18.40) |
| Hypertension                                |                   |                    |                   |                   |                   |
| No                                          | 41,492 (68.9%)    | 61,464 (69.9%)     | 82,497 (68.8%)    | 58,873 (68.7%)    | 28,668 (68.1%)    |
| Yes                                         | 18,707 (31.1%)    | 26,517 (30.1%)     | 37,375 (31.2%)    | 26,832 (31.3%)    | 13,441 (31.9%)    |
| Hyperlipidemia                              |                   |                    |                   |                   |                   |
| No                                          | 48,172 (80.0%)    | 71,307 (81.0%)     | 96,712 (80.7%)    | 68,990 (80.5%)    | 33,660 (79.9%)    |
| Yes                                         | 12,027 (20.0%)    | 16,674 (19.0%)     | 23,160 (19.3%)    | 16,715 (19.5%)    | 8,449 (20.1%)     |

Combined caffeine intake was calculated as the sum of caffeine intake from coffee and tea. Body mass index calculated as weight in kilograms divided by height in meters squared

**Table S6. Unadjusted associations of phenotypic caffeine intake with new-onset coronary artery disease**

| Caffeine Trait  | Caffeine intake (mg/day) | N total | N cases (%) | Person-time at risk (years) | Absolute risk | Hazard Ratio | 95% Confidence interval | P value   |
|-----------------|--------------------------|---------|-------------|-----------------------------|---------------|--------------|-------------------------|-----------|
| Combined intake | 0                        | 8,552   | 265 (3.10)  | 68222.505                   | 3.10          | 1            | Reference               | Reference |
|                 | 1-60                     | 24,983  | 1018 (4.07) | 198905.92                   | 4.07          | 1.32         | (1.15-1.51)             | 6.27E-05  |
|                 | 61-120                   | 53,067  | 2173 (4.09) | 421662.78                   | 4.09          | 1.33         | (1.17-1.51)             | 1.22E-05  |
|                 | 121-180                  | 78,040  | 3412 (4.37) | 617136.57                   | 4.37          | 1.43         | (1.26-1.62)             | 2.52E-08  |
|                 | 181-240                  | 66,669  | 2725 (4.09) | 526813.63                   | 4.09          | 1.34         | (1.18-1.51)             | 7.05E-06  |
|                 | 241-300                  | 49,359  | 2107 (4.27) | 389466.51                   | 4.27          | 1.40         | (1.23-1.59)             | 2.89E-07  |
|                 | 301-360                  | 29,858  | 1226 (4.11) | 235711.7                    | 4.11          | 1.34         | (1.18-1.53)             | 1.40E-05  |
|                 | >360                     | 35,281  | 1755 (4.97) | 277356.55                   | 4.97          | 1.63         | (1.44-1.86)             | 8.88E-14  |
| Coffee          | 0                        | 81,341  | 3615 (4.44) | 644426.54                   | 4.44          | 1            | Reference               | Reference |
|                 | 1-60                     | 95,254  | 4183 (4.39) | 753153.67                   | 4.39          | 0.99         | (0.95-1.04)             | 0.67      |
|                 | 61-120                   | 59,247  | 2266 (3.82) | 468704.42                   | 3.82          | 0.86         | (0.82-0.91)             | 2.78E-08  |
|                 | 121-180                  | 47,987  | 1767 (3.68) | 380342.59                   | 3.68          | 0.83         | (0.78-0.88)             | 8.42E-11  |
|                 | 181-240                  | 21,319  | 975 (4.57)  | 168465.82                   | 4.57          | 1.03         | (0.96-1.11)             | 0.39      |
|                 | 241-300                  | 23,492  | 944 (4.02)  | 185517.36                   | 4.02          | 0.91         | (0.84-0.98)             | 8.00E-03  |
|                 | 301-360                  | 14,826  | 637 (4.30)  | 117194.67                   | 4.30          | 0.97         | (0.89-1.06)             | 0.48      |
|                 | >360                     | 13,082  | 680 (5.20)  | 103020.73                   | 5.20          | 1.18         | (1.09-1.28)             | 8.54E-05  |
| Tea             | 0                        | 57,433  | 2461 (4.28) | 454797.51                   | 4.28          | 1            | Reference               | Reference |
|                 | 1-60                     | 84,260  | 3165 (3.76) | 670336.26                   | 3.76          | 0.87         | (0.83-0.92)             | 3.38E-07  |
|                 | 61-120                   | 114,525 | 4809 (4.20) | 906479.66                   | 4.20          | 0.98         | (0.93-1.03)             | 0.43      |
|                 | 121-180                  | 81,674  | 3620 (4.43) | 643994.84                   | 4.43          | 1.04         | (0.99-1.09)             | 0.13      |
|                 | >180                     | 39,905  | 2012 (5.04) | 313272.29                   | 5.04          | 1.19         | (1.12-1.26)             | 9.29E-09  |

Unadjusted Cox regression analyses. 60 mg caffeine is equivalent to the caffeine content of one cup of instant coffee or 2 cups of tea. Person-time follow up is provided per 1000 person-time years

**Table S7. Unadjusted associations of phenotypic caffeine intake with new-onset type 2 diabetes**

| Caffeine Trait  | Caffeine intake (mg) | N total | N cases (%) | Person-time at risk (years) | Absolute risk | Hazard Ratio | 95% Confidence interval | P value   |
|-----------------|----------------------|---------|-------------|-----------------------------|---------------|--------------|-------------------------|-----------|
| Combined intake | 0                    | 8,456   | 183 (2.16)  | 67917.769                   | 2.16          | 1            | Reference               | Reference |
|                 | 1-60                 | 25,012  | 651 (2.60)  | 200942.01                   | 2.60          | 1.20         | (1.02-1.42)             | 0.03      |
|                 | 61-120               | 53,431  | 1156 (2.16) | 429276.93                   | 2.16          | 1.00         | (0.86-1.17)             | 0.99      |
|                 | 121-180              | 78,764  | 1516 (1.92) | 631103.5                    | 1.92          | 0.89         | (0.77-1.04)             | 0.15      |
|                 | 181-240              | 67,123  | 1208 (1.80) | 537016.45                   | 1.80          | 0.84         | (0.72-0.98)             | 0.02      |
|                 | 241-300              | 49,606  | 959 (1.93)  | 396529.11                   | 1.93          | 0.90         | (0.77-1.05)             | 0.19      |
|                 | 301-360              | 29,979  | 548 (1.83)  | 239606.07                   | 1.83          | 0.85         | (0.72-1.01)             | 0.06      |
|                 | >360                 | 35,347  | 761 (2.15)  | 282170.46                   | 2.15          | 1.00         | (0.85-1.18)             | 0.96      |
| Coffee          | 0                    | 82,017  | 1946 (2.37) | 657588.3                    | 2.37          | 1            | Reference               | Reference |
|                 | 1-60                 | 95,947  | 1938 (2.02) | 768505.49                   | 2.02          | 0.85         | (0.80-0.91)             | 6.8E-07   |
|                 | 61-120               | 59,622  | 1046 (1.75) | 477108.76                   | 1.75          | 0.74         | (0.69-0.80)             | 6.9E-15   |
|                 | 121-180              | 48,112  | 791 (1.64)  | 385341.27                   | 1.64          | 0.69         | (0.64-0.75)             | <1.0E-16  |
|                 | 181-240              | 21,358  | 451 (2.11)  | 171104.9                    | 2.11          | 0.89         | (0.80-0.99)             | 0.03      |
|                 | 241-300              | 23,542  | 426 (1.81)  | 188172.08                   | 1.81          | 0.77         | (0.69-0.85)             | 6.7E-07   |
|                 | 301-360              | 14,788  | 291 (1.97)  | 118443.97                   | 1.97          | 0.83         | (0.73-0.94)             | 3.2E-03   |
|                 | >360                 | 13,051  | 304 (2.33)  | 104416.4                    | 2.33          | 0.98         | (0.87-1.11)             | 0.81      |
| Tea             | 0                    | 57,152  | 1402 (2.45) | 457663.58                   | 2.45          | 1            | Reference               | Reference |
|                 | 1-60                 | 84,659  | 1602 (1.89) | 680333.52                   | 1.89          | 0.77         | (0.71-0.82)             | 4.77E-13  |
|                 | 61-120               | 115,382 | 2084 (1.81) | 925272.64                   | 1.81          | 0.74         | (0.69-0.79)             | <1.0E-16  |
|                 | 121-180              | 82,365  | 1627 (1.98) | 658185.41                   | 1.98          | 0.81         | (0.75-0.87)             | 5.18E-09  |
|                 | >180                 | 40,311  | 885 (2.20)  | 321345.95                   | 2.20          | 0.90         | (0.83-0.98)             | 0.02      |

Unadjusted Cox regression analyses. 60 mg caffeine is equivalent to the caffeine content of one cup of instant coffee or 2 cups of tea. Person-time follow up is provided per 1000 person-time years

**Table S8. Multivariable adjusted associations of phenotypic caffeine intake with new-onset coronary artery disease**

| Caffeine Trait  | Caffeine intake (mg) | N total | N cases (%) | Person-time at risk (years) | Absolute risk | Hazard Ratio | 95% Confidence interval | P value   |
|-----------------|----------------------|---------|-------------|-----------------------------|---------------|--------------|-------------------------|-----------|
| Combined intake | 0                    | 8,552   | 265 (3.10)  | 68222.505                   | 3.10          | 1            | Reference               | Reference |
|                 | 1-60                 | 24,983  | 1018 (4.07) | 198905.92                   | 4.07          | 1.11         | (0.97-1.27)             | 0.12      |
|                 | 61-120               | 53,067  | 2173 (4.09) | 421662.78                   | 4.09          | 1.07         | (0.95-1.22)             | 0.27      |
|                 | 121-180              | 78,040  | 3412 (4.37) | 617136.57                   | 4.37          | 1.11         | (0.98-1.26)             | 0.10      |
|                 | 181-240              | 66,669  | 2725 (4.09) | 526813.63                   | 4.09          | 1.01         | (0.89-1.14)             | 0.90      |
|                 | 241-300              | 49,359  | 2107 (4.27) | 389466.51                   | 4.27          | 1.04         | (0.91-1.18)             | 0.58      |
|                 | 301-360              | 29,858  | 1226 (4.11) | 235711.7                    | 4.11          | 0.98         | (0.85-1.11)             | 0.72      |
|                 | >360                 | 35,281  | 1755 (4.97) | 277356.55                   | 4.97          | 1.12         | (0.98-1.27)             | 0.10      |
| Coffee          | 0                    | 81,341  | 3615 (4.44) | 644426.54                   | 4.44          | 1            | Reference               | Reference |
|                 | 1-60                 | 95,254  | 4183 (4.39) | 753153.67                   | 4.39          | 0.92         | (0.88-0.96)             | 3.89E-04  |
|                 | 61-120               | 59,247  | 2266 (3.82) | 468704.42                   | 3.82          | 0.81         | (0.77-0.85)             | 7.99E-15  |
|                 | 121-180              | 47,987  | 1767 (3.68) | 380342.59                   | 3.68          | 0.77         | (0.73-0.82)             | <1.0E-16  |
|                 | 181-240              | 21,319  | 975 (4.57)  | 168465.82                   | 4.57          | 0.91         | (0.85-0.98)             | 1.13E-02  |
|                 | 241-300              | 23,492  | 944 (4.02)  | 185517.36                   | 4.02          | 0.84         | (0.78-0.90)             | 1.04E-06  |
|                 | 301-360              | 14,826  | 637 (4.30)  | 117194.67                   | 4.30          | 0.83         | (0.76-0.90)             | 1.70E-05  |
|                 | >360                 | 13,082  | 680 (5.20)  | 103020.73                   | 5.20          | 0.98         | (0.91-1.07)             | 0.71      |
| Tea             | 0                    | 57,433  | 2461 (4.28) | 454797.51                   | 4.28          | 1            | Reference               | Reference |
|                 | 1-60                 | 84,260  | 3165 (3.76) | 670336.26                   | 3.76          | 0.87         | (0.83-0.92)             | 3.78E-07  |
|                 | 61-120               | 114,525 | 4809 (4.20) | 906479.66                   | 4.20          | 0.96         | (0.91-1.00)             | 7.20E-02  |
|                 | 121-180              | 81,674  | 3620 (4.43) | 643994.84                   | 4.43          | 0.99         | (0.94-1.04)             | 0.64      |
|                 | >180                 | 39,905  | 2012 (5.04) | 313272.29                   | 5.04          | 1.07         | (1.00-1.13)             | 3.56E-02  |

Cox regression analyses adjusted for age at inclusion, sex, body mass index (kg/m<sup>2</sup>) at inclusion, active smoking, log-transformed weekly alcohol intake (UK units), and Townsend Deprivation Index. 60 mg caffeine is equivalent to the caffeine content of one cup of instant coffee or 2 cups of tea. Person-time follow up is provided per 1000 person-time years

**Table S9. Multivariable adjusted associations of phenotypic of caffeine intake with new-onset type 2 diabetes**

| Caffeine Trait  | Caffeine intake (mg) | N total | N cases (%) | Person-time at risk (years) | Absolute risk | Hazard Ratio | 95% Confidence interval | P value   |
|-----------------|----------------------|---------|-------------|-----------------------------|---------------|--------------|-------------------------|-----------|
| Combined intake | 0                    | 8,456   | 183 (2.16)  | 67917.769                   | 2.16          | 1            | Reference               | Reference |
|                 | 1-60                 | 25,012  | 651 (2.60)  | 200942.01                   | 2.60          | 1.20         | (1.02-1.42)             | 0.03      |
|                 | 61-120               | 53,431  | 1156 (2.16) | 429276.93                   | 2.16          | 1.07         | (0.91-1.25)             | 0.40      |
|                 | 121-180              | 78,764  | 1516 (1.92) | 631103.5                    | 1.92          | 0.94         | (0.81-1.10)             | 0.45      |
|                 | 181-240              | 67,123  | 1208 (1.80) | 537016.45                   | 1.80          | 0.89         | (0.76-1.04)             | 0.13      |
|                 | 241-300              | 49,606  | 959 (1.93)  | 396529.11                   | 1.93          | 0.93         | (0.79-1.09)             | 0.37      |
|                 | 301-360              | 29,979  | 548 (1.83)  | 239606.07                   | 1.83          | 0.83         | (0.71-0.99)             | 0.04      |
|                 | >360                 | 35,347  | 761 (2.15)  | 282170.46                   | 2.15          | 0.91         | (0.77-1.07)             | 0.23      |
| Coffee          | 0                    | 82,017  | 1946 (2.37) | 657588.3                    | 2.37          | 1            | Reference               | Reference |
|                 | 1-60                 | 95,947  | 1938 (2.02) | 768505.49                   | 2.02          | 0.88         | (0.82-0.93)             | 4.46E-05  |
|                 | 61-120               | 59,622  | 1046 (1.75) | 477108.76                   | 1.75          | 0.81         | (0.75-0.87)             | 4.87E-08  |
|                 | 121-180              | 48,112  | 791 (1.64)  | 385341.27                   | 1.64          | 0.77         | (0.71-0.84)             | 6.62E-10  |
|                 | 181-240              | 21,358  | 451 (2.11)  | 171104.9                    | 2.11          | 0.84         | (0.76-0.93)             | 1.07E-03  |
|                 | 241-300              | 23,542  | 426 (1.81)  | 188172.08                   | 1.81          | 0.79         | (0.71-0.87)             | 7.93E-06  |
|                 | 301-360              | 14,788  | 291 (1.97)  | 118443.97                   | 1.97          | 0.76         | (0.67-0.86)             | 1.57E-05  |
|                 | >360                 | 13,051  | 304 (2.33)  | 104416.4                    | 2.33          | 0.84         | (0.74-0.94)             | 3.80E-03  |
| Tea             | 0                    | 57,152  | 1402 (2.45) | 457663.58                   | 2.45          | 1            | Reference               | Reference |
|                 | 1-60                 | 84,659  | 1602 (1.89) | 680333.52                   | 1.89          | 0.91         | (0.85-0.98)             | 1.25E-02  |
|                 | 61-120               | 115,382 | 2084 (1.81) | 925272.64                   | 1.81          | 0.86         | (0.80-0.92)             | 1.59E-05  |
|                 | 121-180              | 82,365  | 1627 (1.98) | 658185.41                   | 1.98          | 0.89         | (0.82-0.95)             | 1.02E-03  |
|                 | >180                 | 40,311  | 885 (2.20)  | 321345.95                   | 2.20          | 0.90         | (0.83-0.98)             | 1.67E-02  |

Cox regression analyses adjusted for age at inclusion, sex, body mass index (kg/m<sup>2</sup>) at inclusion, active smoking, log-transformed weekly alcohol intake (UK units), and Townsend Deprivation Index. 60 mg caffeine is equivalent to the caffeine content of one cup of instant coffee or 2 cups of tea. Person-time follow up is provided per 1000 person-time years

**Table S10. Associations of caffeine from coffee or tea additionally adjusted for caffeine intake from tea or coffee respectively**

| Caffeine trait | Outcome | Caffeine intake (mg/day) | N total | N cases | Person-time at risk (years) | Hazard Ratio | 95% Confidence interval | P value   |
|----------------|---------|--------------------------|---------|---------|-----------------------------|--------------|-------------------------|-----------|
| Coffee         | CAD     | 0                        | 80,659  | 3585    | 638979.73                   | 1            | Reference               | Reference |
|                |         | 1-60                     | 93,173  | 4105    | 736562.39                   | 0.93         | 0.89-0.98               | 3.49E-03  |
|                |         | 61-120                   | 57,946  | 2217    | 458418.04                   | 0.82         | 0.78-0.87               | 4.92E-13  |
|                |         | 121-180                  | 46,065  | 1707    | 364964.26                   | 0.79         | 0.75-0.84               | 1.33E-14  |
|                |         | 181-240                  | 20,183  | 939     | 159374.73                   | 0.95         | 0.88-1.02               | 0.16      |
|                |         | 241-300                  | 21,967  | 898     | 173350.49                   | 0.87         | 0.81-0.94               | 2.88E-04  |
|                |         | 301-360                  | 13,727  | 595     | 108434.36                   | 0.86         | 0.78-0.94               | 7.88E-04  |
|                |         | >360                     | 12,089  | 635     | 95192.156                   | 1.03         | 0.94-1.12               | 0.58      |
| Tea            | CAD     | 0                        | 55,825  | 2382    | 442052.98                   | 1            | Reference               | Reference |
|                |         | 1-60                     | 79,764  | 2978    | 634422.94                   | 0.86         | 0.81-0.91               | 5.56E-08  |
|                |         | 61-120                   | 103,981 | 4370    | 822745.06                   | 0.94         | 0.89-0.99               | 0.02      |
|                |         | 121-180                  | 71,617  | 3189    | 564449.23                   | 0.97         | 0.91-1.02               | 0.22      |
|                |         | >180                     | 34,622  | 1762    | 271605.95                   | 1.04         | 0.98-1.11               | 0.19      |
| Coffee         | T2D     | 0                        | 81,341  | 1929    | 652143.91                   | 1            | Reference               | Reference |
|                |         | 1-60                     | 93,878  | 1903    | 751852.25                   | 0.86         | 0.81-0.92               | 4.79E-06  |
|                |         | 61-120                   | 58,318  | 1014    | 466693.64                   | 0.79         | 0.73-0.85               | 1.29E-09  |
|                |         | 121-180                  | 46,186  | 758     | 369829.71                   | 0.74         | 0.68-0.81               | 7.46E-12  |
|                |         | 181-240                  | 20,222  | 428     | 161941.97                   | 0.80         | 0.72-0.89               | 4.48E-05  |
|                |         | 241-300                  | 22,000  | 388     | 175830.94                   | 0.72         | 0.65-0.81               | 1.50E-08  |
|                |         | 301-360                  | 13,701  | 274     | 109674.18                   | 0.72         | 0.63-0.82               | 9.16E-07  |
|                |         | >360                     | 12,072  | 288     | 96595.711                   | 0.80         | 0.71-0.91               | 8.75E-04  |
| Tea            | T2D     | 0                        | 55,552  | 1357    | 444786.2                    | 1            | Reference               | Reference |
|                |         | 1-60                     | 80,118  | 1502    | 643704.93                   | 0.88         | 0.82-0.95               | 7.49E-04  |
|                |         | 61-120                   | 104,793 | 1898    | 840005.24                   | 0.82         | 0.76-0.88               | 5.82E-08  |
|                |         | 121-180                  | 72,247  | 1430    | 577158.15                   | 0.82         | 0.76-0.89               | 6.32E-07  |
|                |         | >180                     | 35,008  | 795     | 278907.78                   | 0.85         | 0.78-0.93               | 4.70E-04  |

Adjusted for age at inclusion, sex, body mass index (kg/m<sup>2</sup>) at inclusion, active smoking, log-transformed weekly alcohol intake (UK units), and Townsend Deprivation Index. The analyses for caffeine from coffee were additionally adjusted for caffeine intake from tea, and the analyses for caffeine from tea were additionally adjusted for caffeine intake from coffee.

**Table S11. Associations of decaffeinated and caffeinated cups of coffee with new-onset coronary artery disease and type 2 diabetes**

| Group         | Outcome | Cups of coffee | N total | N cases | Person-time at risk (years) | Hazard Ratio | 95% Confidence interval | P value   |
|---------------|---------|----------------|---------|---------|-----------------------------|--------------|-------------------------|-----------|
| Decaffeinated | CAD     | 0              | 85,257  | 6,222   | 662436.76                   | 1            | Reference               | Reference |
|               |         | 1              | 16,340  | 1,116   | 127170.84                   | 0.95         | 0.89-1.01               | 0.10      |
|               |         | 2              | 14,932  | 928     | 116645.79                   | 0.83         | 0.78-0.89               | 3.21E-07  |
|               |         | 3              | 9,881   | 700     | 76817.509                   | 0.96         | 0.89-1.04               | 0.28      |
|               |         | 4              | 7,147   | 503     | 55563.823                   | 0.92         | 0.84-1.01               | 0.07      |
|               |         | 5              | 4,312   | 304     | 33483.425                   | 0.93         | 0.83-1.05               | 0.24      |
|               |         | 6              | 2,879   | 230     | 22278.00                    | 1.02         | 0.90-1.17               | 0.75      |
|               |         | >6             | 2,351   | 176     | 18201.01                    | 0.98         | 0.84-1.14               | 0.79      |
| Caffeinated   | CAD     | 0              | 85,257  | 6,222   | 662436.76                   | 1            | Reference               | Reference |
|               |         | 1              | 62,144  | 4,025   | 482864.61                   | 0.83         | 0.80-0.87               | <1.0E-16  |
|               |         | 2              | 60,858  | 3,718   | 474437.8                    | 0.77         | 0.74-0.80               | <1.0E-16  |
|               |         | 3              | 40,666  | 2,562   | 317174.8                    | 0.80         | 0.76-0.84               | <1.0E-16  |
|               |         | 4              | 28,098  | 1,891   | 218703.22                   | 0.83         | 0.79-0.87               | 1.84E-12  |
|               |         | 5              | 16,594  | 1,165   | 128721.25                   | 0.86         | 0.81-0.92               | 5.62E-06  |
|               |         | 6              | 11,122  | 825     | 86165.836                   | 0.85         | 0.79-0.92               | 1.56E-05  |
|               |         | >6             | 9,411   | 803     | 72635.775                   | 0.97         | 0.90-1.04               | 0.38      |
| Decaffeinated | T2D     | 0              | 85,257  | 4,689   | 669744.72                   | 1            | Reference               | Reference |
|               |         | 1              | 16,340  | 765     | 128765.31                   | 0.94         | 0.87-1.01               | 0.10      |
|               |         | 2              | 14,932  | 681     | 117636.71                   | 0.89         | 0.82-0.96               | 0.00      |
|               |         | 3              | 9,881   | 476     | 77887.652                   | 0.92         | 0.83-1.01               | 0.08      |
|               |         | 4              | 7,147   | 374     | 56086.719                   | 0.93         | 0.84-1.04               | 0.20      |
|               |         | 5              | 4,312   | 233     | 33805.93                    | 0.92         | 0.80-1.05               | 0.20      |
|               |         | 6              | 2,879   | 178     | 22489.786                   | 1.04         | 0.89-1.20               | 0.63      |
|               |         | >6             | 2,351   | 149     | 18356.787                   | 1.04         | 0.89-1.23               | 0.62      |
| Caffeinated   | T2D     | 0              | 85,257  | 4,689   | 669744.72                   | 1            | Reference               | Reference |
|               |         | 1              | 62,144  | 2,813   | 488247.68                   | 0.89         | 0.85-0.93               | 1.77E-06  |
|               |         | 2              | 60,858  | 2,691   | 479099.39                   | 0.87         | 0.83-0.91               | 1.40E-08  |
|               |         | 3              | 40,666  | 1,844   | 320263.23                   | 0.89         | 0.84-0.93               | 1.17E-05  |
|               |         | 4              | 28,098  | 1,456   | 220558.29                   | 0.94         | 0.88-1.00               | 0.04      |
|               |         | 5              | 16,594  | 916     | 129881.67                   | 0.96         | 0.89-1.03               | 0.23      |
|               |         | 6              | 11,122  | 639     | 87104.843                   | 0.91         | 0.84-0.99               | 0.03      |
|               |         | >6             | 9,411   | 635     | 73355.381                   | 1.05         | 0.97-1.14               | 0.24      |

Adjusted for age at inclusion, sex, body mass index (kg/m<sup>2</sup>) at inclusion, active smoking, log-transformed weekly alcohol intake (UK units), and Townsend Deprivation Index. Results are provided for individuals who drank decaffeinated or decaffeinated coffee per cup of coffee.



**Table S12. GWAS top SNP results for combined caffeine intake at  $P < 1.67 \times 10^{-8}$**

| SNP                      | CHR | hg19      | EFAL        | NEFAL    | EF Freq  | BETA     | SE       | P value   | Genomic Band | Nearest genes            | eQTL genes                            | DEPICT genes |
|--------------------------|-----|-----------|-------------|----------|----------|----------|----------|-----------|--------------|--------------------------|---------------------------------------|--------------|
| rs2472297                | 15  | 75027880  | C           | T        | 0.731645 | -0.10487 | 0.002616 | 2.4E-351  | q24.1        | CYP1A1                   |                                       |              |
| rs4410790                | 7   | 17284577  | T           | C        | 0.364122 | -0.08137 | 0.002412 | 1.50E-249 | p21.1        | AHR                      |                                       |              |
| rs17685                  | 7   | 75616105  | G           | A        | 0.721471 | -0.0408  | 0.002584 | 3.80E-56  | q11.23       | POR, STYXL1              | AC005077.12                           |              |
| rs56113850               | 19  | 41353107  | T           | C        | 0.421755 | -0.02649 | 0.002351 | 1.90E-29  | q13.2        | CYP2A6                   |                                       |              |
| rs2231142                | 4   | 89052323  | G           | T        | 0.886707 | 0.03913  | 0.00366  | 1.10E-26  | q22.1        | ABCG2                    |                                       |              |
| 7:73042302_GCTTT_G       | 7   | 73042302  | GCTTT       | G        | 0.866226 | -0.03591 | 0.003412 | 6.60E-26  | q11.23       | MLXIPL                   | MLXIPL                                |              |
| rs768283768              | 1   | 150701510 | A           | AC       | 0.419751 | 0.024685 | 0.002462 | 1.20E-23  | q21.3        | HORMAD1, CTSS            | CERS2, CTSS, GOLPH3L, HORMAD1, SETDB1 |              |
| rs1260326                | 2   | 27730940  | T           | C        | 0.391852 | -0.02297 | 0.002377 | 4.20E-22  | p23.3        | GCKR                     |                                       |              |
| rs6062679                | 20  | 62889991  | T           | C        | 0.534615 | -0.02278 | 0.002358 | 4.50E-22  | q13.33       | PCMTD2                   | PCMTD2                                |              |
| rs199612805              | 22  | 24843991  | T           | TGAAACCA | 0.986403 | 0.095734 | 0.01012  | 3.10E-21  | q11.23       | SPECC1L-ADORA2A, ADORA2A |                                       |              |
| rs9611527                | 22  | 41644428  | G           | A        | 0.664286 | 0.019792 | 0.002466 | 1.00E-15  | q13.2        | CHADL, RANGAP1           | RANGAP1                               |              |
| rs139797380              | 6   | 137244957 | C           | G        | 0.991601 | 0.106741 | 0.013575 | 3.70E-15  | q23.3        | PEX7, SLC35D3            |                                       |              |
| rs62332762               | 4   | 106143492 | C           | T        | 0.597585 | 0.01828  | 0.002368 | 1.20E-14  | q24          | TET2                     |                                       |              |
| rs117810762              | 10  | 135315795 | G           | A        | 0.982023 | -0.06827 | 0.008863 | 1.30E-14  | q26.3        | SPRN                     |                                       |              |
| rs531431865              | 17  | 46165234  | C           | CA       | 0.678686 | -0.01854 | 0.002537 | 2.70E-13  | q21.32       | CBX1                     |                                       |              |
| rs6265                   | 11  | 27679916  | C           | T        | 0.810755 | 0.021572 | 0.002964 | 3.40E-13  | p14.1        | BDNF                     |                                       |              |
| rs489693                 | 18  | 57882787  | C           | A        | 0.67465  | -0.01759 | 0.002478 | 1.30E-12  | q21.32       | MC4R                     |                                       |              |
| rs12514566               | 5   | 7391462   | G           | A        | 0.664698 | 0.017242 | 0.002456 | 2.20E-12  | p15.31       | ADCY2                    |                                       |              |
| rs1490384                | 6   | 126851160 | C           | T        | 0.501467 | -0.01587 | 0.002323 | 8.30E-12  | q22.32       | CENPW                    |                                       |              |
| 1:174856749_TG_T         | 1   | 174856749 | TG          | T        | 0.538714 | 0.016005 | 0.00235  | 9.70E-12  | q25.1        | RABGAP1L                 |                                       |              |
| rs61141867               | 19  | 47556375  | T           | TG       | 0.253635 | -0.01842 | 0.002725 | 1.40E-11  | q13.32       | NPAS1, TMEM160           |                                       |              |
| rs4240624                | 8   | 9184231   | G           | A        | 0.092461 | 0.02693  | 0.004012 | 1.90E-11  | p23.1        | PPP1R3B                  |                                       |              |
| rs115454798              | 3   | 142092190 | A           | G        | 0.871965 | -0.02252 | 0.003491 | 1.10E-10  | q23          | XRN1                     |                                       |              |
| 16:18776851_G_GA         | 16  | 18776851  | G           | GA       | 0.651439 | 0.017366 | 0.002727 | 1.90E-10  | p12.3        | RPS15A                   | ARL6IP1                               |              |
| rs12591786               | 15  | 60902512  | C           | T        | 0.842038 | 0.020213 | 0.00323  | 3.90E-10  | q22.2        | RORA                     |                                       |              |
| rs215601                 | 7   | 32333921  | A           | C        | 0.372618 | 0.01488  | 0.002404 | 6.00E-10  | p14.3        | PDE1C                    |                                       |              |
| rs4418728                | 10  | 94839724  | G           | T        | 0.550788 | 0.014384 | 0.002333 | 7.00E-10  | q23.33       | CYP26A1                  |                                       |              |
| rs376877108              | 12  | 112020797 | GTT         | G        | 0.201051 | 0.01783  | 0.002912 | 9.10E-10  | q24.12       | ATXN2                    |                                       |              |
| rs78456557               | 3   | 123300686 | C           | G        | 0.900201 | -0.02364 | 0.00389  | 1.20E-09  | q21.1        | PTPLB                    |                                       |              |
| 6:108876096_CAAT_C       | 6   | 108876096 | CAAT        | C        | 0.838739 | 0.018991 | 0.003165 | 2.00E-09  | q21          | FOXO3                    |                                       |              |
| rs7105462                | 11  | 112912048 | G           | A        | 0.40559  | 0.014163 | 0.002366 | 2.10E-09  | q23.2        | NCAM1                    |                                       |              |
| rs2667773                | 15  | 77872191  | A           | G        | 0.686772 | 0.014947 | 0.002506 | 2.50E-09  | q24.3        | LINGO1                   |                                       |              |
| rs754177720              | 6   | 98555544  | CA          | C        | 0.479652 | -0.01384 | 0.002358 | 4.40E-09  | q16.1        | POU3F2                   |                                       |              |
| 20:35568001_AAAAG_A      | 20  | 35568001  | AAAAG       | A        | 0.68498  | 0.014682 | 0.002513 | 5.20E-09  | q11.23       | SAMHD1                   |                                       |              |
| rs12785227               | 10  | 65262685  | A           | G        | 0.685798 | 0.014549 | 0.002507 | 6.50E-09  | q21.3        | REEP3                    |                                       |              |
| 3:50895869_ATAATAATAAT_A | 3   | 50895869  | ATAATAATAAT | A        | 0.915367 | 0.028214 | 0.004864 | 6.60E-09  | p21.2        | DOCK3                    |                                       |              |
| rs1228024                | 11  | 47951353  | C           | A        | 0.340021 | 0.013965 | 0.002453 | 1.30E-08  | p11.2        | PTPRJ                    |                                       |              |

Sentinel SNPs per locus with P values  $< 1.67 \times 10^{-8}$ . Nearest genes were the nearest protein coding gene and any additional gene within 10kb of the sentinel SNP. Abbreviations: SNP, single nucleotide polymorphism; CHR, chromosome; EFAL, effect allele; NEFAL, non-effect allele; EF Freq, effect allele frequency; SE, standard error; eQTL, expression quantitative locus; DEPICT, Data-driven Expression-Prioritized Integration for Complex Traits.

**Table S13. GWAS top SNP results for caffeine intake from coffee at  $P < 1.67 \times 10^{-8}$**

| SNP         | CHR | hg19      | EFAL | NEFAL | EF Freq  | BETA     | SE       | P value   | Genomic Band | Nearest genes | eQTL genes             | DEPICT genes |
|-------------|-----|-----------|------|-------|----------|----------|----------|-----------|--------------|---------------|------------------------|--------------|
| rs2472297   | 15  | 75027880  | C    | T     | 0.731859 | -0.06521 | 0.002587 | 3.10E-140 | q24.1        | CYP1A1        |                        |              |
| rs4410790   | 7   | 17284577  | T    | C     | 0.364412 | -0.05171 | 0.002384 | 2.80E-104 | p21.1        | AHR           |                        |              |
| rs1057868   | 7   | 75615006  | C    | T     | 0.714413 | -0.02445 | 0.002536 | 5.50E-22  | q11.23       | POR           |                        |              |
| rs201399553 | 16  | 53829963  | T    | TTC   | 0.594033 | -0.02253 | 0.002377 | 2.60E-21  | q12.2        | FTO           |                        |              |
| rs56113850  | 19  | 41353107  | T    | C     | 0.421821 | -0.02071 | 0.002323 | 4.90E-19  | q13.2        | CYP2A6        |                        |              |
| rs11127048  | 2   | 27752463  | G    | A     | 0.381191 | -0.01997 | 0.002398 | 8.10E-17  | p23.3        | GCKR          |                        |              |
| rs66723169  | 18  | 57808978  | C    | A     | 0.769043 | -0.02249 | 0.002732 | 1.80E-16  | q21.32       | MC4R          |                        |              |
| rs34060476  | 7   | 73037956  | A    | G     | 0.865581 | -0.02519 | 0.003365 | 7.10E-14  | q11.23       | MLXIPL        | MLXIPL                 |              |
| rs181251778 | 22  | 24901968  | A    | G     | 0.986146 | 0.072648 | 0.009834 | 1.50E-13  | q11.23       | UPB1          |                        |              |
| rs531431865 | 17  | 46165234  | C    | CA    | 0.678648 | -0.0171  | 0.002507 | 9.00E-12  | q21.32       | CBX1          |                        |              |
| rs7571970   | 2   | 646849    | T    | C     | 0.172823 | -0.02076 | 0.003047 | 9.40E-12  | p25.3        | TMEM18        |                        |              |
| rs1327259   | 6   | 51177811  | A    | G     | 0.614152 | 0.015707 | 0.002365 | 3.10E-11  | p12.2        | PKHD1         |                        |              |
| rs6063085   | 20  | 45840459  | A    | C     | 0.625251 | -0.01571 | 0.00237  | 3.40E-11  | q13.12       | ZMYND8        |                        |              |
| rs2726513   | 4   | 106217358 | G    | T     | 0.587077 | 0.015301 | 0.002347 | 7.00E-11  | q24          | TET2          |                        |              |
| rs4615895   | 1   | 96274668  | G    | A     | 0.259574 | -0.01705 | 0.002627 | 8.60E-11  | p21.3        | TMEM56-RWDD3  |                        |              |
| rs139937261 | 17  | 17585130  | C    | CG    | 0.487688 | -0.01491 | 0.002304 | 9.80E-11  | p11.2        | RAI1          |                        |              |
| rs2298527   | 11  | 112851961 | G    | C     | 0.405568 | 0.014947 | 0.002336 | 1.60E-10  | q23.2        | NCAM1         |                        |              |
| rs35198275  | 3   | 50536092  | A    | G     | 0.865693 | 0.020797 | 0.003387 | 8.20E-10  | p21.31       | CACNA2D2      |                        |              |
| rs12514566  | 5   | 7391462   | G    | A     | 0.664625 | 0.014831 | 0.002428 | 1.00E-09  | p15.31       | ADCY2         |                        |              |
| rs6893807   | 5   | 87965021  | A    | G     | 0.843563 | -0.01916 | 0.003159 | 1.30E-09  | q14.3        | MEF2C         |                        |              |
| rs2521501   | 15  | 91437388  | A    | T     | 0.677316 | 0.014916 | 0.002472 | 1.60E-09  | q26.1        | FES, MAN2A2   | FES                    |              |
| rs768283768 | 1   | 150701510 | A    | AC    | 0.419823 | 0.014214 | 0.002434 | 5.20E-09  | q21.3        | HORMAD1, CTSS | CTSS, GOLPH3L, HORMAD1 |              |
| rs76881016  | 10  | 134196286 | A    | G     | 0.928496 | -0.02584 | 0.004453 | 6.60E-09  | q26.3        | LRRC27        |                        |              |
| rs117810762 | 10  | 135315795 | G    | A     | 0.982047 | -0.05011 | 0.008765 | 1.10E-08  | q26.3        | SPRN          |                        |              |

Sentinel SNPs per locus with P values  $< 1.67 \times 10^{-8}$ . Nearest genes were the nearest protein coding gene and any additional gene within 10kb of the sentinel SNP. Abbreviations: SNP, single nucleotide polymorphism; CHR, chromosome; EFAL, effect allele; NEFAL, non-effect allele; EF Freq, effect allele frequency; SE, standard error; eQTL, expression quantitative locus; DEPICT, Data-driven Expression-Prioritized Integration for Complex Traits.

**Table S14. GWAS top SNP results for caffeine intake from tea at  $P < 1.67 \times 10^{-8}$**

| SNP         | CHR | hg19      | EFAL  | NEFAL  | EF Freq  | BETA     | SE       | P value   | Genomic Band | Nearest genes                     | eQTL genes       | DEPICT genes        |
|-------------|-----|-----------|-------|--------|----------|----------|----------|-----------|--------------|-----------------------------------|------------------|---------------------|
| rs2472297   | 15  | 75027880  | C     | T      | 0.732806 | -0.05411 | 0.002521 | 3.30E-102 | q24.1        | CYP1A1                            |                  | SIN3A               |
| rs4410790   | 7   | 17284577  | T     | C      | 0.36537  | -0.04033 | 0.00232  | 1.10E-67  | p21.1        | AHR                               |                  |                     |
| rs9624470   | 22  | 24820268  | G     | A      | 0.419254 | -0.02534 | 0.002272 | 6.80E-29  | q11.23       | SPECC1L, SPECC1L-ADORA2A, ADORA2A | UPB1             |                     |
| rs17685     | 7   | 75616105  | G     | A      | 0.721688 | -0.02391 | 0.002488 | 7.20E-22  | q11.23       | POR,STYXL1                        |                  |                     |
| rs2465018   | 6   | 51241140  | G     | A      | 0.769413 | -0.02211 | 0.002666 | 1.10E-16  | p12.2        | PKHD1                             |                  |                     |
| rs1481012   | 4   | 89039082  | A     | G      | 0.887297 | 0.026005 | 0.003536 | 1.90E-13  | q22.1        | ABCG2                             |                  |                     |
| rs56188862  | 1   | 174189269 | T     | C      | 0.614947 | 0.016829 | 0.002297 | 2.40E-13  | q25.1        | RABGAP1L                          |                  |                     |
| rs73053413  | 12  | 11329548  | C     | T      | 0.836535 | 0.021681 | 0.003021 | 7.10E-13  | p13.2        | PRR4, TAS2R14, TAS2R42            | PRR4, TAS2R15    |                     |
| rs140775622 | 20  | 62962869  | C     | T      | 0.830545 | -0.02262 | 0.003207 | 1.80E-12  | q13.33       | PCMTD2                            |                  |                     |
| rs4817505   | 21  | 34343828  | T     | C      | 0.607874 | -0.01512 | 0.002292 | 4.20E-11  | q22.11       | OLIG2                             |                  | OLIG2               |
| rs192084998 | 5   | 152077481 | G     | A      | 0.703764 | 0.015836 | 0.002458 | 1.20E-10  | q33.1        | NMUR2                             |                  |                     |
| rs10741694  | 11  | 16286183  | T     | C      | 0.372823 | -0.01474 | 0.002312 | 1.80E-10  | p15.1        | SOX6                              |                  | SOX6                |
| rs132919    | 22  | 41809903  | G     | C      | 0.22639  | -0.01708 | 0.002697 | 2.40E-10  | q13.2        | TEF                               |                  | TEF, ZC3H7B, SREBF2 |
| rs12591786  | 15  | 60902512  | C     | T      | 0.842256 | 0.019576 | 0.003109 | 3.00E-10  | q22.2        | RORA                              |                  |                     |
| rs11204711  | 1   | 150682115 | A     | G      | 0.616497 | -0.01444 | 0.002336 | 6.40E-10  | q21.3        | HORMAD1                           | GOLPH3L, HORMAD1 | SETDB1, RPRD2       |
| rs11022752  | 11  | 13307622  | A     | G      | 0.730907 | -0.01535 | 0.002525 | 1.20E-09  | p15.2        | ARNTL                             |                  |                     |
| rs141180025 | 7   | 39295736  | CT    | C      | 0.391273 | -0.01399 | 0.002335 | 2.10E-09  | p14.1        | POU6F2                            |                  |                     |
| rs2117137   | 3   | 89525505  | A     | G      | 0.594554 | -0.01349 | 0.002273 | 2.90E-09  | p11.1        | EPHA3                             |                  |                     |
| rs62534435  | 9   | 7042938   | C     | G      | 0.796528 | -0.01629 | 0.002776 | 4.40E-09  | p24.1        | KDM4C                             |                  |                     |
| rs28429148  | 16  | 53798319  | G     | A      | 0.565413 | 0.013189 | 0.002288 | 8.20E-09  | q12.2        | FTO                               |                  |                     |
| rs139797380 | 6   | 137244957 | C     | G      | 0.991607 | 0.075145 | 0.013059 | 8.70E-09  | q23.3        | PEX7, SLC35D3                     |                  |                     |
| rs199602679 | 16  | 63031361  | G     | GT     | 0.783938 | -0.01603 | 0.0028   | 1.00E-08  | q21          | CDH8                              |                  |                     |
| rs145755097 | 3   | 50254188  | C     | CTTTGT | 0.852979 | -0.01849 | 0.003258 | 1.40E-08  | p21.31       | GNAI2                             |                  | RBM5                |
| rs77476394  | 1   | 26757610  | CTAAA | C      | 0.208732 | -0.01572 | 0.002785 | 1.60E-08  | p36.11       | LIN28A, DHDDS                     |                  |                     |

Sentinel SNPs per locus with P values  $< 1.67 \times 10^{-8}$ . Nearest genes were the nearest protein coding gene and any additional gene within 10kb of the sentinel SNP. Abbreviations: SNP, single nucleotide polymorphism; CHR, chromosome; EFAL, effect allele; NEFAL, non-effect allele; EF Freq, effect allele frequency; SE, standard error; eQTL, expression quantitative locus; DEPICT, Data-driven Expression-Prioritized Integration for Complex Traits

**Table S15. GWAS SNP results over all caffeine traits at  $P < 1.67 \times 10^{-8}$  based on the lowest P value**

| SNP                          | CH R | hg19      | EFAL            | NEFAL   | EF Freq | INF O | BET A  | SE    | P value  | Origin   | LO CUS | LOC USID | Combined Caffeine intake |       |        |       |          | Caffeine from coffee |       |        |       |          | Caffeine from tea |       |        |       |          |
|------------------------------|------|-----------|-----------------|---------|---------|-------|--------|-------|----------|----------|--------|----------|--------------------------|-------|--------|-------|----------|----------------------|-------|--------|-------|----------|-------------------|-------|--------|-------|----------|
|                              |      |           |                 |         |         |       |        |       |          |          |        |          | EF Freq                  | INF O | BET A  | SE    | P value  | EF Freq              | INF O | BET A  | SE    | P value  | EF Freq           | INF O | BET A  | SE    | P value  |
| rs77476394                   | 1    | 26757610  | CTAA A          | C       | 0.209   | 0.970 | -0.016 | 0.003 | 1.60E-08 | Tea      | 1      | 1        | 0.209                    | 0.970 | -0.005 | 0.003 | 6.30E-02 | 0.209                | 0.970 | 0.003  | 0.003 | 2.80E-01 | 0.209             | 0.970 | -0.016 | 0.003 | 1.60E-08 |
| rs1228024                    | 11   | 47951353  | C               | A       | 0.340   | 0.986 | 0.014  | 0.002 | 1.30E-08 | Combined | 1      | 2        | 0.340                    | 0.986 | 0.014  | 0.002 | 1.30E-08 | 0.340                | 0.986 | 0.007  | 0.002 | 2.60E-03 | 0.340             | 0.986 | 0.008  | 0.002 | 1.00E-03 |
| rs199602679                  | 16   | 63031361  | G               | GT      | 0.784   | 0.936 | -0.016 | 0.003 | 1.00E-08 | Tea      | 1      | 3        | 0.784                    | 0.936 | -0.008 | 0.003 | 3.80E-03 | 0.784                | 0.936 | 0.003  | 0.003 | 2.60E-01 | 0.784             | 0.936 | -0.016 | 0.003 | 1.00E-08 |
| rs76881016                   | 10   | 134196286 | A               | G       | 0.928   | 1.000 | -0.026 | 0.004 | 6.60E-09 | Coffee   | 1      | 4        | 0.928                    | 1.000 | -0.017 | 0.005 | 1.30E-04 | 0.928                | 1.000 | -0.026 | 0.004 | 6.60E-09 | 0.929             | 1.000 | 0.004  | 0.004 | 3.70E-01 |
| rs12785227                   | 10   | 65262685  | A               | G       | 0.686   | 0.997 | 0.015  | 0.003 | 6.50E-09 | Combined | 1      | 5        | 0.686                    | 0.997 | 0.015  | 0.003 | 6.50E-09 | 0.686                | 0.997 | 0.006  | 0.002 | 1.30E-02 | 0.685             | 0.997 | 0.010  | 0.002 | 7.50E-05 |
| 20:35568001_AAAAG_A          | 20   | 35568001  | AAAA G          | A       | 0.685   | 0.989 | 0.015  | 0.003 | 5.20E-09 | Combined | 1      | 6        | 0.685                    | 0.989 | 0.015  | 0.003 | 5.20E-09 | 0.685                | 0.989 | 0.011  | 0.002 | 4.60E-06 | 0.685             | 0.989 | 0.006  | 0.002 | 1.90E-02 |
| rs62534435                   | 9    | 7042938   | C               | G       | 0.797   | 0.997 | -0.016 | 0.003 | 4.40E-09 | Tea      | 1      | 7        | 0.797                    | 0.997 | -0.010 | 0.003 | 6.80E-04 | 0.797                | 0.997 | 0.003  | 0.003 | 3.70E-01 | 0.797             | 0.997 | -0.016 | 0.003 | 4.40E-09 |
| rs754177720                  | 6    | 98555544  | CA              | C       | 0.480   | 0.972 | -0.014 | 0.002 | 4.40E-09 | Combined | 1      | 8        | 0.480                    | 0.972 | -0.014 | 0.002 | 4.40E-09 | 0.479                | 0.972 | -0.012 | 0.002 | 4.20E-07 | 0.480             | 0.972 | -0.005 | 0.002 | 1.80E-02 |
| rs2117137                    | 3    | 89525505  | A               | G       | 0.595   | 1.000 | -0.013 | 0.002 | 2.90E-09 | Tea      | 1      | 9        | 0.595                    | 1.000 | -0.004 | 0.002 | 9.50E-02 | 0.595                | 1.000 | 0.005  | 0.002 | 2.40E-02 | 0.595             | 1.000 | -0.013 | 0.002 | 2.90E-09 |
| rs2667773                    | 15   | 77872191  | A               | G       | 0.687   | 0.995 | 0.015  | 0.003 | 2.50E-09 | Combined | 1      | 10       | 0.687                    | 0.995 | 0.015  | 0.003 | 2.50E-09 | 0.687                | 0.995 | 0.010  | 0.002 | 3.40E-05 | 0.687             | 0.995 | 0.001  | 0.002 | 6.40E-01 |
| rs141180025                  | 7    | 39295736  | CT              | C       | 0.391   | 0.956 | -0.014 | 0.002 | 2.10E-09 | Tea      | 1      | 11       | 0.391                    | 0.956 | -0.004 | 0.002 | 8.70E-02 | 0.391                | 0.956 | 0.005  | 0.002 | 2.40E-02 | 0.391             | 0.956 | -0.014 | 0.002 | 2.10E-09 |
| 6:108876096_CAAT_C           | 6    | 108876096 | CAAT            | C       | 0.839   | 0.990 | 0.019  | 0.003 | 2.00E-09 | Combined | 1      | 12       | 0.839                    | 0.990 | 0.019  | 0.003 | 2.00E-09 | 0.839                | 0.990 | 0.012  | 0.003 | 7.10E-05 | 0.839             | 0.990 | 0.009  | 0.003 | 2.70E-03 |
| rs2521501                    | 15   | 91437388  | A               | T       | 0.677   | 0.983 | 0.015  | 0.002 | 1.60E-09 | Coffee   | 1      | 13       | 0.677                    | 0.983 | 0.010  | 0.002 | 4.80E-05 | 0.677                | 0.983 | 0.015  | 0.002 | 1.60E-09 | 0.677             | 0.983 | -0.005 | 0.002 | 4.40E-02 |
| rs6893807                    | 5    | 87965021  | A               | G       | 0.844   | 0.997 | -0.019 | 0.003 | 1.30E-09 | Coffee   | 1      | 14       | 0.844                    | 0.997 | -0.012 | 0.003 | 1.90E-04 | 0.844                | 0.997 | -0.019 | 0.003 | 1.30E-09 | 0.844             | 0.997 | 0.007  | 0.003 | 2.60E-02 |
| rs11022752                   | 11   | 13307622  | A               | G       | 0.731   | 0.992 | -0.015 | 0.003 | 1.20E-09 | Tea      | 1      | 15       | 0.731                    | 0.992 | -0.014 | 0.003 | 5.00E-08 | 0.731                | 0.992 | -0.003 | 0.003 | 2.30E-01 | 0.731             | 0.992 | -0.015 | 0.003 | 1.20E-09 |
| rs78456557                   | 3    | 123300686 | C               | G       | 0.900   | 0.987 | -0.024 | 0.004 | 1.20E-09 | Combined | 1      | 16       | 0.900                    | 0.987 | -0.024 | 0.004 | 1.20E-09 | 0.900                | 0.987 | -0.016 | 0.004 | 4.40E-05 | 0.900             | 0.987 | -0.011 | 0.004 | 3.10E-03 |
| rs376877108                  | 12   | 112020797 | GTT             | G       | 0.201   | 0.987 | 0.018  | 0.003 | 9.10E-10 | Combined | 1      | 17       | 0.201                    | 0.987 | 0.018  | 0.003 | 9.10E-10 | 0.201                | 0.987 | 0.007  | 0.003 | 9.80E-03 | 0.201             | 0.987 | 0.013  | 0.003 | 3.00E-06 |
| rs35198275                   | 3    | 50536092  | A               | G       | 0.866   | 0.982 | 0.021  | 0.003 | 8.20E-10 | Coffee   | 1      | 20       | 0.866                    | 0.982 | 0.019  | 0.003 | 2.40E-08 | 0.866                | 0.982 | 0.021  | 0.003 | 8.20E-10 | 0.866             | 0.982 | -0.010 | 0.003 | 3.70E-03 |
| rs145755097                  | 3    | 50254188  | C               | CTTT GT | 0.853   | 0.935 | -0.018 | 0.003 | 1.40E-08 | Tea      | 0      | 20       | 0.853                    | 0.935 | 0.000  | 0.003 | 8.90E-01 | 0.853                | 0.935 | 0.009  | 0.003 | 7.20E-03 | 0.853             | 0.935 | -0.018 | 0.003 | 1.40E-08 |
| 3:50895869_ATAATAATAAT_AAT_A | 3    | 50895869  | ATAA TAATAATAAT | A       | 0.915   | 0.735 | 0.028  | 0.005 | 6.60E-09 | Combined | 0      | 20       | 0.915                    | 0.735 | 0.028  | 0.005 | 6.60E-09 | 0.915                | 0.735 | 0.022  | 0.005 | 5.10E-06 | 0.915             | 0.735 | 0.002  | 0.005 | 6.60E-01 |
| rs4418728                    | 10   | 94839724  | G               | T       | 0.551   | 0.999 | 0.014  | 0.002 | 7.00E-10 | Combined | 1      | 21       | 0.551                    | 0.999 | 0.014  | 0.002 | 7.00E-10 | 0.551                | 0.999 | 0.006  | 0.002 | 1.10E-02 | 0.551             | 0.999 | 0.010  | 0.002 | 2.90E-06 |
| rs215601                     | 7    | 32333921  | A               | C       | 0.373   | 0.998 | 0.015  | 0.002 | 6.00E-10 | Combined | 1      | 22       | 0.373                    | 0.998 | 0.015  | 0.002 | 6.00E-10 | 0.373                | 0.998 | 0.009  | 0.002 | 8.50E-05 | 0.373             | 0.998 | 0.007  | 0.002 | 1.20E-03 |
| rs12591786                   | 15   | 60902512  | C               | T       | 0.842   | 0.967 | 0.020  | 0.003 | 3.00E-10 | Tea      | 1      | 24       | 0.842                    | 0.967 | 0.020  | 0.003 | 3.90E-10 | 0.842                | 0.967 | 0.006  | 0.003 | 7.40E-02 | 0.842             | 0.967 | 0.020  | 0.003 | 3.00E-10 |
| 16:18776851_G_GA             | 16   | 18776851  | G               | GA      | 0.651   | 0.797 | 0.017  | 0.003 | 1.90E-10 | Combined | 1      | 25       | 0.651                    | 0.797 | 0.017  | 0.003 | 1.90E-10 | 0.652                | 0.797 | 0.011  | 0.003 | 4.50E-05 | 0.651             | 0.797 | 0.008  | 0.003 | 2.20E-03 |
| rs10741694                   | 11   | 16286183  | T               | C       | 0.373   | 0.994 | -0.015 | 0.002 | 1.80E-10 | Tea      | 1      | 26       | 0.373                    | 0.994 | -0.008 | 0.002 | 4.60E-04 | 0.373                | 0.994 | 0.002  | 0.002 | 3.60E-01 | 0.373             | 0.994 | -0.015 | 0.002 | 1.80E-10 |

|                  |     |           |      |       |         |       |        |       |          |          |       |         | Combined Caffeine intake |       |        |       |          | Caffeine from coffee |       |        |       |          | Caffeine from tea |       |        |       |          |
|------------------|-----|-----------|------|-------|---------|-------|--------|-------|----------|----------|-------|---------|--------------------------|-------|--------|-------|----------|----------------------|-------|--------|-------|----------|-------------------|-------|--------|-------|----------|
| SNP              | CHR | hg19      | EFAL | NEFAL | EF Freq | INFO  | BETA   | SE    | P value  | Origin   | LOCUS | LOCUSID | EF Freq                  | INFO  | BETA   | SE    | P value  | EF Freq              | INFO  | BETA   | SE    | P value  | EF Freq           | INFO  | BETA   | SE    | P value  |
| rs2298527        | 11  | 112851961 | G    | C     | 0.406   | 0.996 | 0.015  | 0.002 | 1.60E-10 | Coffee   | 1     | 28      | 0.406                    | 0.996 | 0.014  | 0.002 | 2.40E-09 | 0.406                | 0.996 | 0.015  | 0.002 | 1.60E-10 | 0.405             | 0.996 | -0.002 | 0.002 | 4.10E-01 |
| rs7105462        | 11  | 112912048 | G    | A     | 0.406   | 0.993 | 0.014  | 0.002 | 2.10E-09 | Combined | 0     | 28      | 0.406                    | 0.993 | 0.014  | 0.002 | 2.10E-09 | 0.406                | 0.993 | 0.015  | 0.002 | 1.90E-10 | 0.405             | 0.993 | -0.002 | 0.002 | 4.30E-01 |
| rs192084998      | 5   | 152077481 | G    | A     | 0.704   | 0.989 | 0.016  | 0.002 | 1.20E-10 | Tea      | 1     | 29      | 0.704                    | 0.989 | 0.009  | 0.003 | 4.40E-04 | 0.704                | 0.989 | -0.002 | 0.003 | 5.30E-01 | 0.704             | 0.989 | 0.016  | 0.002 | 1.20E-10 |
| rs115454798      | 3   | 142092190 | A    | G     | 0.872   | 0.990 | -0.023 | 0.003 | 1.10E-10 | Combined | 1     | 30      | 0.872                    | 0.990 | -0.023 | 0.003 | 1.10E-10 | 0.872                | 0.990 | -0.013 | 0.003 | 1.60E-04 | 0.872             | 0.990 | -0.010 | 0.003 | 4.30E-03 |
| rs139937261      | 17  | 17585130  | C    | CG    | 0.488   | 0.988 | -0.015 | 0.002 | 9.80E-11 | Coffee   | 1     | 31      | 0.488                    | 0.988 | -0.009 | 0.002 | 1.00E-04 | 0.488                | 0.988 | -0.015 | 0.002 | 9.80E-11 | 0.488             | 0.988 | 0.006  | 0.002 | 7.60E-03 |
| rs4615895        | 1   | 96274668  | G    | A     | 0.260   | 0.991 | -0.017 | 0.003 | 8.60E-11 | Coffee   | 1     | 32      | 0.260                    | 0.991 | -0.009 | 0.003 | 8.10E-04 | 0.260                | 0.991 | -0.017 | 0.003 | 8.60E-11 | 0.260             | 0.991 | 0.005  | 0.003 | 5.00E-02 |
| rs4817505        | 21  | 34343828  | T    | C     | 0.608   | 0.993 | -0.015 | 0.002 | 4.20E-11 | Tea      | 1     | 33      | 0.608                    | 0.993 | -0.003 | 0.002 | 1.80E-01 | 0.608                | 0.993 | 0.008  | 0.002 | 3.20E-04 | 0.608             | 0.993 | -0.015 | 0.002 | 4.20E-11 |
| rs6063085        | 20  | 45840459  | A    | C     | 0.625   | 1.000 | -0.016 | 0.002 | 3.40E-11 | Coffee   | 1     | 34      | 0.625                    | 1.000 | -0.007 | 0.002 | 3.20E-03 | 0.625                | 1.000 | -0.016 | 0.002 | 3.40E-11 | 0.625             | 1.000 | 0.008  | 0.002 | 8.40E-04 |
| rs4240624        | 8   | 9184231   | G    | A     | 0.092   | 0.999 | 0.027  | 0.004 | 1.90E-11 | Combined | 1     | 35      | 0.092                    | 0.999 | 0.027  | 0.004 | 1.90E-11 | 0.092                | 0.999 | 0.016  | 0.004 | 6.40E-05 | 0.092             | 0.999 | 0.013  | 0.004 | 5.90E-04 |
| rs61141867       | 19  | 47556375  | T    | TG    | 0.254   | 0.955 | -0.018 | 0.003 | 1.40E-11 | Combined | 1     | 36      | 0.254                    | 0.955 | -0.018 | 0.003 | 1.40E-11 | 0.253                | 0.955 | -0.011 | 0.003 | 4.20E-05 | 0.254             | 0.955 | -0.008 | 0.003 | 1.70E-03 |
| rs7571970        | 2   | 646849    | T    | C     | 0.173   | 0.990 | -0.021 | 0.003 | 9.40E-12 | Coffee   | 1     | 37      | 0.173                    | 0.990 | -0.017 | 0.003 | 4.10E-08 | 0.173                | 0.990 | -0.021 | 0.003 | 9.40E-12 | 0.174             | 0.990 | 0.007  | 0.003 | 2.00E-02 |
| rs1490384        | 6   | 126851160 | C    | T     | 0.501   | 1.000 | -0.016 | 0.002 | 8.30E-12 | Combined | 1     | 38      | 0.501                    | 1.000 | -0.016 | 0.002 | 8.30E-12 | 0.502                | 1.000 | -0.009 | 0.002 | 2.10E-04 | 0.502             | 1.000 | -0.008 | 0.002 | 2.20E-04 |
| rs12514566       | 5   | 7391462   | G    | A     | 0.665   | 0.998 | 0.017  | 0.002 | 2.20E-12 | Combined | 1     | 40      | 0.665                    | 0.998 | 0.017  | 0.002 | 2.20E-12 | 0.665                | 0.998 | 0.015  | 0.002 | 1.00E-09 | 0.664             | 0.998 | 0.004  | 0.002 | 7.60E-02 |
| rs73053413       | 12  | 11329548  | C    | T     | 0.837   | 0.997 | 0.022  | 0.003 | 7.10E-13 | Tea      | 1     | 41      | 0.836                    | 0.997 | 0.005  | 0.003 | 9.10E-02 | 0.836                | 0.997 | -0.015 | 0.003 | 1.20E-06 | 0.837             | 0.997 | 0.022  | 0.003 | 7.10E-13 |
| rs6265           | 11  | 27679916  | C    | T     | 0.811   | 1.000 | 0.022  | 0.003 | 3.40E-13 | Combined | 1     | 42      | 0.811                    | 1.000 | 0.022  | 0.003 | 3.40E-13 | 0.811                | 1.000 | 0.015  | 0.003 | 5.60E-07 | 0.811             | 1.000 | 0.012  | 0.003 | 3.20E-05 |
| rs531431865      | 17  | 46165234  | C    | CA    | 0.679   | 0.959 | -0.019 | 0.003 | 2.70E-13 | Combined | 1     | 44      | 0.679                    | 0.959 | -0.019 | 0.003 | 2.70E-13 | 0.679                | 0.959 | -0.017 | 0.003 | 9.00E-12 | 0.679             | 0.959 | -0.003 | 0.002 | 2.70E-01 |
| rs56188862       | 1   | 174189269 | T    | C     | 0.615   | 0.998 | 0.017  | 0.002 | 2.40E-13 | Tea      | 1     | 46      | 0.615                    | 0.998 | 0.015  | 0.002 | 5.10E-10 | 0.615                | 0.998 | 0.001  | 0.002 | 7.80E-01 | 0.615             | 0.998 | 0.017  | 0.002 | 2.40E-13 |
| l:174856749_TG_T | 1   | 174856749 | TG   | T     | 0.539   | 0.980 | 0.016  | 0.002 | 9.70E-12 | Combined | 0     | 46      | 0.539                    | 0.980 | 0.016  | 0.002 | 9.70E-12 | 0.538                | 0.980 | 0.003  | 0.002 | 2.50E-01 | 0.539             | 0.980 | 0.015  | 0.002 | 5.90E-11 |
| rs117810762      | 10  | 135315795 | G    | A     | 0.982   | 0.987 | -0.068 | 0.009 | 1.30E-14 | Combined | 1     | 48      | 0.982                    | 0.987 | -0.068 | 0.009 | 1.30E-14 | 0.982                | 0.987 | -0.050 | 0.009 | 1.10E-08 | 0.982             | 0.987 | -0.025 | 0.009 | 3.10E-03 |
| rs62332762       | 4   | 106143492 | C    | T     | 0.598   | 0.998 | 0.018  | 0.002 | 1.20E-14 | Combined | 1     | 50      | 0.598                    | 0.998 | 0.018  | 0.002 | 1.20E-14 | 0.598                | 0.998 | 0.015  | 0.002 | 1.20E-10 | 0.598             | 0.998 | 0.005  | 0.002 | 3.80E-02 |
| rs2726513        | 4   | 106217358 | G    | T     | 0.587   | 0.984 | 0.015  | 0.002 | 7.00E-11 | Coffee   | 0     | 50      | 0.587                    | 0.984 | 0.018  | 0.002 | 2.60E-14 | 0.587                | 0.984 | 0.015  | 0.002 | 7.00E-11 | 0.587             | 0.984 | 0.004  | 0.002 | 1.00E-01 |
| rs139797380      | 6   | 137244957 | C    | G     | 0.992   | 0.867 | 0.107  | 0.014 | 3.70E-15 | Combined | 1     | 52      | 0.992                    | 0.867 | 0.107  | 0.014 | 3.70E-15 | 0.992                | 0.867 | 0.056  | 0.013 | 2.60E-05 | 0.992             | 0.867 | 0.075  | 0.013 | 8.70E-09 |
| rs9611527        | 22  | 41644428  | G    | A     | 0.664   | 0.994 | 0.020  | 0.002 | 1.00E-15 | Combined | 1     | 54      | 0.664                    | 0.994 | 0.020  | 0.002 | 1.00E-15 | 0.664                | 0.994 | 0.009  | 0.002 | 1.70E-04 | 0.664             | 0.994 | 0.015  | 0.002 | 3.60E-10 |
| rs132919         | 22  | 41809903  | G    | C     | 0.226   | 0.980 | -0.017 | 0.003 | 2.40E-10 | Tea      | 0     | 54      | 0.226                    | 0.980 | -0.019 | 0.003 | 3.90E-12 | 0.226                | 0.980 | -0.006 | 0.003 | 4.60E-02 | 0.226             | 0.980 | -0.017 | 0.003 | 2.40E-10 |
| rs66723169       | 18  | 57808978  | C    | A     | 0.769   | 0.992 | -0.022 | 0.003 | 1.80E-16 | Coffee   | 1     | 56      | 0.769                    | 0.992 | -0.019 | 0.003 | 3.90E-12 | 0.769                | 0.992 | -0.022 | 0.003 | 1.80E-16 | 0.769             | 0.992 | 0.002  | 0.003 | 3.60E-01 |
| rs489693         | 18  | 57882787  | C    | A     | 0.675   | 1.000 | -0.018 | 0.002 | 1.30E-12 | Combined | 0     | 56      | 0.675                    | 1.000 | -0.018 | 0.002 | 1.30E-12 | 0.674                | 1.000 | -0.016 | 0.002 | 4.30E-11 | 0.674             | 1.000 | -0.003 | 0.002 | 2.10E-01 |
| rs2465018        | 6   | 51241140  | G    | A     | 0.769   | 0.987 | -0.022 | 0.003 | 1.10E-16 | Tea      | 1     | 58      | 0.770                    | 0.987 | -0.001 | 0.003 | 6.00E-01 | 0.770                | 0.987 | 0.016  | 0.003 | 2.20E-09 | 0.769             | 0.987 | -0.022 | 0.003 | 1.10E-16 |

| SNP                | CHR | hg19      | EFAL | NEFAL        | EF Freq | INFO  | BETA   | SE    | P value   | Origin   | LOCUS | LOCUSID | Combined Caffeine intake |       |        |       |           | Caffeine from coffee |       |        |       |           | Caffeine from tea |       |       |       |           |
|--------------------|-----|-----------|------|--------------|---------|-------|--------|-------|-----------|----------|-------|---------|--------------------------|-------|--------|-------|-----------|----------------------|-------|--------|-------|-----------|-------------------|-------|-------|-------|-----------|
|                    |     |           |      |              |         |       |        |       |           |          |       |         | EF Freq                  | INFO  | BETA   | SE    | P value   | EF Freq              | INFO  | BETA   | SE    | P value   | EF Freq           | INFO  | BETA  | SE    | P value   |
| rs1327259          | 6   | 51177811  | A    | G            | 0.614   | 0.992 | 0.016  | 0.002 | 3.10E-11  | Coffee   | 0     | 58      | 0.614                    | 0.992 | 0.004  | 0.002 | 1.10E-01  | 0.614                | 0.992 | 0.016  | 0.002 | 3.10E-11  | 0.614             | 0.992 | -     | 0.002 | 5.50E-08  |
| rs201399553        | 16  | 53829963  | T    | TTC          | 0.594   | 0.965 | -0.023 | 0.002 | 2.60E-21  | Coffee   | 1     | 60      | 0.594                    | 0.965 | -0.011 | 0.002 | 9.00E-06  | 0.594                | 0.965 | -0.023 | 0.002 | 2.60E-21  | 0.594             | 0.965 | 0.011 | 0.002 | 4.30E-06  |
| rs28429148         | 16  | 53798319  | G    | A            | 0.565   | 0.970 | 0.013  | 0.002 | 8.20E-09  | Tea      | 0     | 60      | 0.565                    | 0.970 | -0.008 | 0.002 | 1.20E-03  | 0.565                | 0.970 | -0.021 | 0.002 | 8.50E-19  | 0.565             | 0.970 | 0.013 | 0.002 | 8.20E-09  |
| rs6062679          | 20  | 62889991  | T    | C            | 0.535   | 0.973 | -0.023 | 0.002 | 4.50E-22  | Combined | 1     | 62      | 0.535                    | 0.973 | -0.023 | 0.002 | 4.50E-22  | 0.535                | 0.973 | -0.013 | 0.002 | 2.00E-08  | 0.535             | 0.973 | -     | 0.002 | 2.60E-10  |
| rs140775622        | 20  | 62962869  | C    | T            | 0.831   | 0.859 | -0.023 | 0.003 | 1.80E-12  | Tea      | 0     | 62      | 0.830                    | 0.859 | -0.025 | 0.003 | 1.20E-13  | 0.830                | 0.859 | -0.012 | 0.003 | 4.70E-04  | 0.831             | 0.859 | -     | 0.003 | 1.80E-12  |
| rs1260326          | 2   | 27730940  | T    | C            | 0.392   | 1.000 | -0.023 | 0.002 | 4.20E-22  | Combined | 1     | 64      | 0.392                    | 1.000 | -0.023 | 0.002 | 4.20E-22  | 0.392                | 1.000 | -0.020 | 0.002 | 1.00E-16  | 0.392             | 1.000 | -     | 0.002 | 1.30E-02  |
| rs11127048         | 2   | 27752463  | G    | A            | 0.381   | 0.968 | -0.020 | 0.002 | 8.10E-17  | Coffee   | 0     | 64      | 0.381                    | 0.968 | -0.023 | 0.002 | 1.20E-20  | 0.381                | 0.968 | -0.020 | 0.002 | 8.10E-17  | 0.382             | 0.968 | -     | 0.002 | 5.00E-02  |
| rs768283768        | 1   | 150701510 | A    | AC           | 0.420   | 0.913 | 0.025  | 0.002 | 1.20E-23  | Combined | 1     | 67      | 0.420                    | 0.913 | 0.025  | 0.002 | 1.20E-23  | 0.420                | 0.913 | 0.014  | 0.002 | 5.20E-09  | 0.420             | 0.913 | 0.014 | 0.002 | 2.80E-09  |
| rs11204711         | 1   | 150682115 | A    | G            | 0.616   | 0.964 | -0.014 | 0.002 | 6.40E-10  | Tea      | 0     | 67      | 0.617                    | 0.964 | -0.023 | 0.002 | 9.00E-21  | 0.616                | 0.964 | -0.012 | 0.002 | 2.30E-07  | 0.616             | 0.964 | -     | 0.002 | 6.40E-10  |
| 7:73042302_GCTTT_G | 7   | 73042302  | GCTT | G            | 0.866   | 0.994 | -0.036 | 0.003 | 6.60E-26  | Combined | 1     | 69      | 0.866                    | 0.994 | -0.036 | 0.003 | 6.60E-26  | 0.866                | 0.994 | -0.025 | 0.003 | 8.70E-14  | 0.867             | 0.994 | -     | 0.003 | 1.20E-03  |
| rs34060476         | 7   | 73037956  | A    | G            | 0.866   | 0.995 | -0.025 | 0.003 | 7.10E-14  | Coffee   | 0     | 69      | 0.866                    | 0.995 | -0.035 | 0.003 | 2.90E-25  | 0.866                | 0.995 | -0.025 | 0.003 | 7.10E-14  | 0.866             | 0.995 | -     | 0.003 | 2.30E-03  |
| rs2231142          | 4   | 89052323  | G    | T            | 0.887   | 1.000 | 0.039  | 0.004 | 1.10E-26  | Combined | 1     | 71      | 0.887                    | 1.000 | 0.039  | 0.004 | 1.10E-26  | 0.887                | 1.000 | 0.019  | 0.004 | 1.10E-07  | 0.886             | 1.000 | 0.026 | 0.004 | 2.40E-13  |
| rs1481012          | 4   | 89039082  | A    | G            | 0.887   | 0.994 | 0.026  | 0.004 | 1.90E-13  | Tea      | 0     | 71      | 0.888                    | 0.994 | 0.039  | 0.004 | 2.70E-26  | 0.888                | 0.994 | 0.019  | 0.004 | 2.00E-07  | 0.887             | 0.994 | 0.026 | 0.004 | 1.90E-13  |
| rs9624470          | 22  | 24820268  | G    | A            | 0.419   | 0.989 | -0.025 | 0.002 | 6.80E-29  | Tea      | 1     | 74      | 0.419                    | 0.989 | -0.019 | 0.002 | 3.40E-16  | 0.419                | 0.989 | 0.003  | 0.002 | 2.20E-01  | 0.419             | 0.989 | -     | 0.002 | 6.80E-29  |
| rs199612805        | 22  | 24843991  | T    | TGAA<br>ACCA | 0.986   | 0.984 | 0.096  | 0.010 | 3.10E-21  | Combined | 0     | 74      | 0.986                    | 0.984 | 0.096  | 0.010 | 3.10E-21  | 0.986                | 0.984 | 0.073  | 0.010 | 2.40E-13  | 0.986             | 0.984 | 0.035 | 0.010 | 3.10E-04  |
| rs181251778        | 22  | 24901968  | A    | G            | 0.986   | 0.992 | 0.073  | 0.010 | 1.50E-13  | Coffee   | 0     | 74      | 0.986                    | 0.992 | 0.093  | 0.010 | 7.00E-21  | 0.986                | 0.992 | 0.073  | 0.010 | 1.50E-13  | 0.986             | 0.992 | 0.034 | 0.010 | 3.30E-04  |
| rs56113850         | 19  | 41353107  | T    | C            | 0.422   | 0.994 | -0.026 | 0.002 | 1.90E-29  | Combined | 1     | 76      | 0.422                    | 0.994 | -0.026 | 0.002 | 1.90E-29  | 0.422                | 0.994 | -0.021 | 0.002 | 4.90E-19  | 0.422             | 0.994 | -     | 0.002 | 3.50E-04  |
| rs17685            | 7   | 75616105  | G    | A            | 0.721   | 1.000 | -0.041 | 0.003 | 3.80E-56  | Combined | 1     | 79      | 0.721                    | 1.000 | -0.041 | 0.003 | 3.80E-56  | 0.721                | 1.000 | -0.024 | 0.003 | 9.20E-22  | 0.722             | 1.000 | -     | 0.002 | 7.20E-22  |
| rs1057868          | 7   | 75615006  | C    | T            | 0.714   | 1.000 | -0.024 | 0.003 | 5.50E-22  | Coffee   | 0     | 79      | 0.714                    | 1.000 | -0.040 | 0.003 | 9.00E-56  | 0.714                | 1.000 | -0.024 | 0.003 | 5.50E-22  | 0.715             | 1.000 | -     | 0.002 | 2.70E-21  |
| rs4410790          | 7   | 17284577  | T    | C            | 0.364   | 1.000 | -0.081 | 0.002 | 1.50E-249 | Combined | 1     | 82      | 0.364                    | 1.000 | -0.081 | 0.002 | 1.50E-249 | 0.364                | 1.000 | -0.052 | 0.002 | 2.80E-104 | 0.365             | 1.000 | -     | 0.002 | 1.10E-67  |
| rs2472297          | 15  | 75027880  | C    | T            | 0.732   | 1.000 | -0.105 | 0.003 | 2.4E-351  | Combined | 1     | 85      | 0.732                    | 1.000 | -0.105 | 0.003 | 2.4E-351  | 0.732                | 1.000 | -0.065 | 0.003 | 3.10E-140 | 0.733             | 1.000 | -     | 0.003 | 3.30E-102 |

Sentinel SNPs at each locus over all traits combined based on lowest P value are indicated by a 1 in the LOCUS column. Non-sentinel SNPs are indicated by a 0 in the LOCUS column. The trait corresponding with the SNP's lowest P value is indicated in the Origin column. Details for each SNP are provided for all three traits. Abbreviations: SNP, single nucleotide polymorphism; CHR, chromosome; EFAL, effect allele; NEFAL, non-effect allele; EF Freq, effect allele frequency; SE, standard error

**Table S16. Previously reported SNPs associated with caffeine intake or coffee consumption**

| Study                                                                                                                                    | Author                                  | Year | PMID                     | Population        | SNPs      | Chr | hg19      | EFAL/NEFAL | Beta (SE)       | P value  | Comment                                      | Within 1MB of sentinel SNP | Sentinel SNP       | Sentinel SNP GWAS                                          |
|------------------------------------------------------------------------------------------------------------------------------------------|-----------------------------------------|------|--------------------------|-------------------|-----------|-----|-----------|------------|-----------------|----------|----------------------------------------------|----------------------------|--------------------|------------------------------------------------------------|
| Non-additive genome-wide association scan reveals a new gene associated with habitual coffee consumption.                                | Pirastu                                 | 2016 | <a href="#">27561104</a> | Italian           | rs2216084 | 6   | 107553312 | T/C        | 0.082 (0.014)   | 9.25E-09 | Only significant in discovery stage          | No                         |                    |                                                            |
|                                                                                                                                          |                                         |      |                          |                   | rs6942255 | 6   | 107555018 | A/G        | 0.082 (0.014)   | 9.79E-09 | Only significant in discovery stage          | No                         |                    |                                                            |
|                                                                                                                                          |                                         |      |                          |                   | rs7745311 | 6   | 107565060 | C/T        | 0.082 (0.014)   | 1.23E-08 | Only significant in discovery stage          | No                         |                    |                                                            |
|                                                                                                                                          |                                         |      |                          |                   | rs7754744 | 6   | 107551281 | G/A        | 0.082 (0.014)   | 8.80E-09 | Only significant in discovery stage          | No                         |                    |                                                            |
|                                                                                                                                          |                                         |      |                          |                   | rs9386630 | 6   | 107562914 | G/T        | 0.082 (0.014)   | 1.07E-08 | Only significant in discovery stage          | No                         |                    |                                                            |
| Genome-wide meta-analysis identifies six novel loci associated with habitual coffee consumption.                                         | Coffee and Caffeine Genetics Consortium | 2015 | <a href="#">25288136</a> | European/African  | rs6968554 | 7   | 17287106  | A/G        | -0.07 (0.01)    | 2.78E-10 | Significant in stage 2                       | Yes, not sentinel SNP      | rs4410790          | Caffeine combined, Caffeine from Coffee, Caffeine from Tea |
|                                                                                                                                          |                                         |      |                          |                   | rs2470893 | 15  | 75019449  | T/C        | 0.09 (0.01)     | 9.92E-11 | Significant in stage 2                       | Yes, not sentinel SNP      | rs2472297          | Caffeine combined, Caffeine from Coffee, Caffeine from Tea |
|                                                                                                                                          |                                         |      |                          |                   | rs2472297 | 15  | 75027880  | T/C        | 0.11 (0.01)     | 3.26E-16 | Significant in stage 2                       | Yes, sentinel SNP          | rs2472297          | Caffeine combined, Caffeine from Coffee, Caffeine from Tea |
|                                                                                                                                          |                                         |      |                          |                   | rs4410790 | 7   | 17284577  | T/C        | -0.14 (0.01)    | 1.48E-57 | Significant in stage 1                       | Yes, sentinel SNP          | rs4410790          | Caffeine combined, Caffeine from Coffee, Caffeine from Tea |
|                                                                                                                                          |                                         |      |                          |                   | rs7800944 | 7   | 73035857  | T/C        | -0.05 (0.01)    | 7.82E-09 | Significant in stage 1                       | Yes, not sentinel SNP      | 7:73042302_GCTTT_G | Caffeine combined, Caffeine from Coffee                    |
|                                                                                                                                          |                                         |      |                          |                   | rs17685   | 7   | 75616105  | A/G        | 0.07 (0.01)     | 9.06E-14 | Significant in stage 1                       | Yes, sentinel SNP          | rs17685            | Caffeine combined, Caffeine from Coffee, Caffeine from Tea |
|                                                                                                                                          |                                         |      |                          |                   | rs2470893 | 15  | 75019449  | T/C        | 0.0675 (0.010)  | 2.39E-08 | Meta-analysis results                        | Yes, not sentinel SNP      | rs2472297          | Caffeine combined, Caffeine from Coffee, Caffeine from Tea |
| Genome-wide association analysis of coffee drinking suggests association with CYP1A1/CYP1A2 and NRCAM                                    | Amin                                    | 2012 | <a href="#">21876539</a> | Northern European | rs2470893 | 15  | 75019449  | T/C        | 0.0675 (0.010)  | 2.39E-08 | Meta-analysis results                        | Yes, not sentinel SNP      | rs2472297          | Caffeine combined, Caffeine from Coffee, Caffeine from Tea |
|                                                                                                                                          |                                         |      |                          |                   | rs2472297 | 15  | 75027880  | T/C        | 0.076 (0.011)   | 2.70E-11 | Meta-analysis results                        | Yes, sentinel SNP          | rs2472297          | Caffeine combined, Caffeine from Coffee, Caffeine from Tea |
|                                                                                                                                          |                                         |      |                          |                   | rs6495122 | 15  | 75125645  | C/A        | -0.05 (0.008)   | 7.10E-09 | Meta-analysis results                        | Yes, not sentinel SNP      | rs2472297          | Caffeine combined, Caffeine from Coffee, Caffeine from Tea |
|                                                                                                                                          |                                         |      |                          |                   | rs382140  | 7   | 107782200 | A/G        | 0.079 (0.014)   | 3.90E-09 | Meta-analysis results                        | No                         |                    |                                                            |
| Sequence variants at CYP1A1–CYP1A2 and AHR associate with coffee consumption                                                             | Sulem                                   | 2011 | <a href="#">21357676</a> | European          | rs2472297 | 15  | 75027880  | T/C        | NA              | 5.40E-14 | No effect size reported in combined analysis | Yes, sentinel SNP          | rs2472297          | Caffeine combined, Caffeine from Coffee, Caffeine from Tea |
|                                                                                                                                          |                                         |      |                          |                   | rs6968865 | 7   | 17287269  | T/A        | NA              | 2.30E-11 | No effect size reported in combined analysis | Yes, not sentinel SNP      | rs4410790          | Caffeine combined, Caffeine from Coffee, Caffeine from Tea |
| A genome-wide association study in the Japanese population identifies the 12q24 locus for habitual coffee consumption: The J-MICC Study. | Nakagawa-Senda                          | 2018 | <a href="#">29367735</a> | Japanese          | rs2074356 | 12  | 112645401 | A/G        | 0.1920 (0.0234) | 2.20E-16 | NA                                           | Yes, not sentinel SNP      | rs376877108        | Caffeine combined                                          |

| Study                                                                                                                                        | Author   | Year | PMID                     | Population                 | SNPs       | Chr | hg19     | EFAL/<br>NEFAL | Beta (SE)    | P value  | Comment                  | Within 1MB<br>of sentinel<br>SNP | Sentinel<br>SNP | Sentinel SNP GWAS                                          |
|----------------------------------------------------------------------------------------------------------------------------------------------|----------|------|--------------------------|----------------------------|------------|-----|----------|----------------|--------------|----------|--------------------------|----------------------------------|-----------------|------------------------------------------------------------|
| Genome-wide meta-analysis identifies regions on 7p21 (AHR) and 15q24 (CYP1A2) as determinants of habitual caffeine consumption.              | Cornelis | 2011 | <a href="#">21490707</a> | European descent in the US | rs4410790  | 7   | 17284577 | T/C            | -0.15 (0.02) | 2.40E-19 | NA                       | Yes, sentinel SNP                | rs4410790       | Caffeine combined, Caffeine from Coffee, Caffeine from Tea |
|                                                                                                                                              |          |      |                          |                            | rs2470893  | 15  | 75019449 | T/C            | 0.12 (0.02)  | 5.20E-14 | NA                       | Yes, not sentinel SNP            | rs2472297       | Caffeine combined, Caffeine from Coffee, Caffeine from Tea |
| Genome-wide association study of caffeine metabolites provides new insights to caffeine metabolism and dietary caffeine-consumption behavior | Cornelis | 2016 | <a href="#">27702941</a> | European ancestry          | rs4410790  | 7   | 17284577 | T/C            | NA           | 1.80E-13 | Significant for caffeine | Yes, sentinel SNP                | rs4410790       | Caffeine combined, Caffeine from Coffee, Caffeine from Tea |
|                                                                                                                                              |          |      |                          |                            | rs6968554  | 7   | 17287106 | A/G            | NA           | 5.40E-13 | Significant for caffeine | Yes, not sentinel SNP            | rs4410790       | Caffeine combined, Caffeine from Coffee, Caffeine from Tea |
|                                                                                                                                              |          |      |                          |                            | rs10275488 | 7   | 17303778 | T/C            | NA           | 4.80E-09 | Significant for caffeine | Yes, not sentinel SNP            | rs4410790       | Caffeine combined, Caffeine from Coffee, Caffeine from Tea |
|                                                                                                                                              |          |      |                          |                            | rs12909047 | 15  | 74782356 | A/G            | NA           | 1.30E-11 | Significant for caffeine | Yes, not sentinel SNP            | rs2472297       | Caffeine combined, Caffeine from Coffee, Caffeine from Tea |
|                                                                                                                                              |          |      |                          |                            | rs35107470 | 15  | 74817689 | A/G            | NA           | 2.40E-16 | Significant for caffeine | Yes, not sentinel SNP            | rs2472297       | Caffeine combined, Caffeine from Coffee, Caffeine from Tea |
|                                                                                                                                              |          |      |                          |                            | rs62005807 | 15  | 74890981 | C/G            | NA           | 3.20E-09 | Significant for caffeine | Yes, not sentinel SNP            | rs2472297       | Caffeine combined, Caffeine from Coffee, Caffeine from Tea |
|                                                                                                                                              |          |      |                          |                            | rs2470893  | 15  | 75019449 | T/C            | NA           | 5.30E-18 | Significant for caffeine | Yes, not sentinel SNP            | rs2472297       | Caffeine combined, Caffeine from Coffee, Caffeine from Tea |
|                                                                                                                                              |          |      |                          |                            | rs2472297  | 15  | 75027880 | T/C            | NA           | 1.00E-20 | Significant for caffeine | Yes, sentinel SNP                | rs2472297       | Caffeine combined, Caffeine from Coffee, Caffeine from Tea |

Previously reported SNPs associated with caffeine intake or coffee consumption. Only SNPs that reached  $P < 5 \times 10^{-8}$  were included. Abbreviations: SNP, single nucleotide polymorphism; CHR, chromosome; EFAL, effect allele; NEFAL, non-effect allele; EF Freq, effect allele frequency; SE, standard error



**Table S17. Cups of different coffee type relating to one unit change in genetically determined caffeine intake from coffee**

| <b>Type of coffee usually drunk</b> | <b>N</b> | <b>Median caffeine intake (IQR)</b> | <b>Beta</b> | <b>SE</b> | <b>95% confidence interval</b> | <b>P value</b> |
|-------------------------------------|----------|-------------------------------------|-------------|-----------|--------------------------------|----------------|
| Decaffeinated coffee                | 58,060   | 6 (3-12)                            | 1.47        | 0.10      | 1.26-1.67                      | <0.001         |
| Instant coffee                      | 167,923  | 180 (60-240)                        | 2.10        | 0.06      | 1.97-2.22                      | <0.001         |
| Ground coffee                       | 61,859   | 170 (85-255)                        | 1.73        | 0.08      | 1.57-1.90                      | <0.001         |

Linear regression estimates adjusted for genotyping chip, age at inclusion, sex, and the first 30 principal components

**Table S18. DEPICT tissue and cell type enrichment results for caffeine intake SNPs**

| MeSH term                               | Name                     | MeSH first level term | MeSH second level term   | Combined Caffeine intake |                      | Caffeine from Coffee |                      | Caffeine from Tea |                      |
|-----------------------------------------|--------------------------|-----------------------|--------------------------|--------------------------|----------------------|----------------------|----------------------|-------------------|----------------------|
|                                         |                          |                       |                          | Nominal P value          | False discovery rate | Nominal P value      | False discovery rate | Nominal P value   | False discovery rate |
| A08.186.211.132                         | Brain Stem               | Nervous System        | Central Nervous System   | 2.78E-03                 | <0.05                | 8.96E-03             | >=0.20               | 9.64E-04          | <0.01                |
| A08.186.211.132.810.428.200             | Cerebellum               | Nervous System        | Central Nervous System   | 4.60E-04                 | <0.05                | 6.13E-03             | >=0.20               | 3.65E-04          | <0.01                |
| A08.186.211.865.428                     | Metencephalon            | Nervous System        | Central Nervous System   | 7.06E-04                 | <0.05                | 5.21E-03             | >=0.20               | 3.87E-04          | <0.01                |
| A09.371.729                             | Retina                   | Sense Organs          | Eye                      | 3.40E-03                 | <0.05                | 4.12E-03             | >=0.20               | 5.80E-04          | <0.01                |
| A08.186.211.865                         | Rhombencephalon          | Nervous System        | Central Nervous System   | 7.06E-04                 | <0.05                | 5.21E-03             | >=0.20               | 3.87E-04          | <0.01                |
| A08.186.211                             | Brain                    | Nervous System        | Central Nervous System   | 0.04                     | >=0.20               | 6.83E-03             | >=0.20               | 8.76E-04          | <0.01                |
| A08.186                                 | Central Nervous System   | Nervous System        | Central Nervous System   | 0.04                     | >=0.20               | 6.53E-03             | >=0.20               | 8.67E-04          | <0.01                |
| A08.186.211.464.405                     | Hippocampus              | Nervous System        | Central Nervous System   | 8.37E-03                 | <0.20                | 2.96E-03             | >=0.20               | 1.28E-03          | <0.05                |
| A08.186.211.464                         | Limbic System            | Nervous System        | Central Nervous System   | 0.02                     | >=0.20               | 3.22E-03             | >=0.20               | 2.40E-03          | <0.05                |
| A08.186.211.730.885.287.500.57<br>1.735 | Visual Cortex            | Nervous System        | Central Nervous System   | 0.01                     | <0.20                | 0.01                 | >=0.20               | 8.99E-03          | <0.20                |
| A08.186.211.730.885.287.500             | Cerebral Cortex          | Nervous System        | Central Nervous System   | 0.02                     | >=0.20               | 4.25E-03             | >=0.20               | 3.26E-03          | <0.20                |
| A08.186.211.730.885.287                 | Cerebrum                 | Nervous System        | Central Nervous System   | 0.02                     | >=0.20               | 6.24E-03             | >=0.20               | 3.78E-03          | <0.20                |
| A08.186.211.464.710.225                 | Entorhinal Cortex        | Nervous System        | Central Nervous System   | 0.03                     | >=0.20               | 4.03E-03             | >=0.20               | 3.14E-03          | <0.20                |
| A10.272.497                             | Epidermis                | Tissues               | Epithelium               | 0.27                     | >=0.20               | 0.84                 | >=0.20               | 0.01              | <0.20                |
| A11.872.653                             | Neural Stem Cells        | Cells                 | Stem Cells               | 0.22                     | >=0.20               | 0.18                 | >=0.20               | 3.63E-03          | <0.20                |
| A08.186.211.730.885.287.500.57<br>1     | Occipital Lobe           | Nervous System        | Central Nervous System   | 0.01                     | >=0.20               | 0.01                 | >=0.20               | 7.79E-03          | <0.20                |
| A08.186.211.464.710                     | Parahippocampal Gyrus    | Nervous System        | Central Nervous System   | 0.03                     | >=0.20               | 4.03E-03             | >=0.20               | 3.14E-03          | <0.20                |
| A08.186.211.730                         | Prosencephalon           | Nervous System        | Central Nervous System   | 0.03                     | >=0.20               | 8.28E-03             | >=0.20               | 6.68E-03          | <0.20                |
| A08.186.211.730.885                     | Telencephalon            | Nervous System        | Central Nervous System   | 0.02                     | >=0.20               | 6.47E-03             | >=0.20               | 3.80E-03          | <0.20                |
| A08.186.211.730.885.287.500.86<br>3     | Temporal Lobe            | Nervous System        | Central Nervous System   | 0.04                     | >=0.20               | 5.27E-03             | >=0.20               | 4.01E-03          | <0.20                |
| A06.407.071                             | Adrenal Glands           | Endocrine System      | Endocrine Glands         | 2.35E-03                 | <0.05                | 0.16                 | >=0.20               | 0.35              | >=0.20               |
| A06.407.071.140                         | Adrenal Cortex           | Endocrine System      | Endocrine Glands         | 4.35E-03                 | <0.20                | 0.25                 | >=0.20               | 0.4               | >=0.20               |
| A10.165.114.830.500                     | Abdominal Fat            | Tissues               | Connective Tissue        | 0.68                     | >=0.20               | 0.56                 | >=0.20               | 0.26              | >=0.20               |
| A11.329.114                             | Adipocytes               | Cells                 | Connective Tissue Cells  | 0.45                     | >=0.20               | 0.81                 | >=0.20               | 0.66              | >=0.20               |
| A10.165.114                             | Adipose Tissue           | Tissues               | Connective Tissue        | 0.61                     | >=0.20               | 0.59                 | >=0.20               | 0.28              | >=0.20               |
| A10.165.114.830                         | Adipose Tissue White     | Tissues               | Connective Tissue        | 0.6                      | >=0.20               | 0.55                 | >=0.20               | 0.23              | >=0.20               |
| A05.360.319.114                         | Adnexa Uteri             | Urogenital System     | Genitalia                | 0.14                     | >=0.20               | 0.37                 | >=0.20               | 0.24              | >=0.20               |
| A11.872.040                             | Adult Stem Cells         | Cells                 | Stem Cells               | 0.44                     | >=0.20               | 0.88                 | >=0.20               | 0.62              | >=0.20               |
| A09.371.060                             | Anterior Eye Segment     | Sense Organs          | Eye                      | 0.78                     | >=0.20               | 0.98                 | >=0.20               | 0.36              | >=0.20               |
| A11.063                                 | Antibody Producing Cells | Cells                 | Antibody-Producing Cells | 0.79                     | >=0.20               | 0.08                 | >=0.20               | 0.98              | >=0.20               |
| A11.066                                 | Antigen Presenting Cells | Cells                 | Antigen-Presenting Cells | 0.99                     | >=0.20               | 0.43                 | >=0.20               | 0.64              | >=0.20               |

| MeSH term                       | Name                       | MeSH first level term    | MeSH second level term  | Combined Caffeine intake |                      | Caffeine from Coffee |                      | Caffeine from Tea |                      |
|---------------------------------|----------------------------|--------------------------|-------------------------|--------------------------|----------------------|----------------------|----------------------|-------------------|----------------------|
|                                 |                            |                          |                         | Nominal P value          | False discovery rate | Nominal P value      | False discovery rate | Nominal P value   | False discovery rate |
| A07.541.510.110                 | Aortic Valve               | Cardiovascular System    | Heart                   | 0.14                     | >=0.20               | 0.35                 | >=0.20               | 0.11              | >=0.20               |
| A07.231.114                     | Arteries                   | Cardiovascular System    | Blood Vessels           | 0.86                     | >=0.20               | 0.99                 | >=0.20               | 0.53              | >=0.20               |
| A07.541.358.100                 | Atrial Appendage           | Cardiovascular System    | Heart                   | 0.3                      | >=0.20               | 0.13                 | >=0.20               | 0.58              | >=0.20               |
| A11.118.637.555.567.562         | B Lymphocytes              | Cells                    | Blood Cells             | 0.79                     | >=0.20               | 0.08                 | >=0.20               | 0.98              | >=0.20               |
| A08.186.211.730.885.287.249     | Basal Ganglia              | Nervous System           | Central Nervous System  | 0.13                     | >=0.20               | 0.35                 | >=0.20               | 0.1               | >=0.20               |
| A15.145                         | Blood                      | Hemic and Immune Systems | Blood                   | 0.92                     | >=0.20               | 0.08                 | >=0.20               | 0.93              | >=0.20               |
| A15.145.229                     | Blood Cells                | Hemic and Immune Systems | Blood                   | 0.97                     | >=0.20               | 0.08                 | >=0.20               | 0.94              | >=0.20               |
| A15.145.229.188                 | Blood Platelets            | Hemic and Immune Systems | Blood                   | 0.86                     | >=0.20               | 0.13                 | >=0.20               | 1                 | >=0.20               |
| A07.231                         | Blood Vessels              | Cardiovascular System    | Blood Vessels           | 0.95                     | >=0.20               | 0.98                 | >=0.20               | 0.87              | >=0.20               |
| A02.835.232                     | Bone and Bones             | Musculoskeletal System   | Skeleton                | 0.98                     | >=0.20               | 0.21                 | >=0.20               | 0.95              | >=0.20               |
| A15.382.216                     | Bone Marrow                | Hemic and Immune Systems | Immune System           | 0.97                     | >=0.20               | 0.18                 | >=0.20               | 0.95              | >=0.20               |
| A15.378.316                     | Bone Marrow Cells          | Hemic and Immune Systems | Hematopoietic System    | 1                        | >=0.20               | 0.48                 | >=0.20               | 0.93              | >=0.20               |
| A02.835.232.043                 | Bones of Lower Extremity   | Musculoskeletal System   | Skeleton                | 0.76                     | >=0.20               | 0.97                 | >=0.20               | 0.41              | >=0.20               |
| A02.165                         | Cartilage                  | Musculoskeletal System   | Cartilage               | 0.2                      | >=0.20               | 0.73                 | >=0.20               | 0.62              | >=0.20               |
| A15.145.229.637.555.567.569.200 | CD4 Positive T Lymphocytes | Hemic and Immune Systems | Blood                   | 0.29                     | >=0.20               | 0.11                 | >=0.20               | 0.41              | >=0.20               |
| A03.556.249.249.209             | Cecum                      | Digestive System         | Gastrointestinal Tract  | 0.31                     | >=0.20               | 0.57                 | >=0.20               | 0.71              | >=0.20               |
| A02.835.232.834.151             | Cervical Vertebrae         | Musculoskeletal System   | Skeleton                | 0.36                     | >=0.20               | 0.75                 | >=0.20               | 0.46              | >=0.20               |
| A05.360.319.679.256             | Cervix Uteri               | Urogenital System        | Genitalia               | 0.74                     | >=0.20               | 0.46                 | >=0.20               | 0.96              | >=0.20               |
| A11.329.171                     | Chondrocytes               | Cells                    | Connective Tissue Cells | 0.53                     | >=0.20               | 0.9                  | >=0.20               | 0.89              | >=0.20               |
| A10.615.284.473                 | Chorion                    | Tissues                  | Membranes               | 0.64                     | >=0.20               | 0.97                 | >=0.20               | 0.93              | >=0.20               |
| A10.165.450.300                 | Cicatrix                   | Tissues                  | Connective Tissue       | 0.86                     | >=0.20               | 0.81                 | >=0.20               | 0.66              | >=0.20               |
| A03.556.249.249.356             | Colon                      | Digestive System         | Gastrointestinal Tract  | 0.28                     | >=0.20               | 0.78                 | >=0.20               | 0.69              | >=0.20               |
| A03.556.249.249.356.668         | Colon Sigmoid              | Digestive System         | Gastrointestinal Tract  | 0.31                     | >=0.20               | 0.45                 | >=0.20               | 0.56              | >=0.20               |
| A09.371.337.168                 | Conjunctiva                | Sense Organs             | Eye                     | 0.76                     | >=0.20               | 0.98                 | >=0.20               | 0.36              | >=0.20               |
| A10.165                         | Connective Tissue          | Tissues                  | Connective Tissue       | 0.98                     | >=0.20               | 0.22                 | >=0.20               | 0.95              | >=0.20               |
| A11.329                         | Connective Tissue Cells    | Cells                    | Connective Tissue Cells | 0.98                     | >=0.20               | 0.98                 | >=0.20               | 0.84              | >=0.20               |
| A08.186.211.730.885.287.249.487 | Corpus Striatum            | Nervous System           | Central Nervous System  | 0.09                     | >=0.20               | 0.47                 | >=0.20               | 0.09              | >=0.20               |
| A06.407.312.497.535.300.500     | Cumulus Cells              | Endocrine System         | Endocrine Glands        | 0.09                     | >=0.20               | 0.36                 | >=0.20               | 0.99              | >=0.20               |
| A15.382.812.260                 | Dendritic Cells            | Hemic and Immune Systems | Immune System           | 0.99                     | >=0.20               | 0.43                 | >=0.20               | 0.64              | >=0.20               |
| A14.549.167                     | Dentition                  | Stomatognathic System    | Mouth                   | 0.97                     | >=0.20               | 0.92                 | >=0.20               | 0.85              | >=0.20               |
| A08.186.211.730.317             | Diencephalon               | Nervous System           | Central Nervous System  | 0.55                     | >=0.20               | 0.21                 | >=0.20               | 0.5               | >=0.20               |
| A11.872.190.260                 | Embryoid Bodies            | Cells                    | Stem Cells              | 0.87                     | >=0.20               | 0.99                 | >=0.20               | 0.98              | >=0.20               |
| A11.872.190                     | Embryonic Stem Cells       | Cells                    | Stem Cells              | 0.45                     | >=0.20               | 0.82                 | >=0.20               | 0.25              | >=0.20               |
| A11.382                         | Endocrine Cells            | Cells                    | Endocrine Cells         | 0.07                     | >=0.20               | 0.69                 | >=0.20               | 0.92              | >=0.20               |
| A06.407                         | Endocrine Glands           | Endocrine System         | Endocrine Glands        | 0.05                     | >=0.20               | 0.38                 | >=0.20               | 0.24              | >=0.20               |
| A05.360.319.679.490             | Endometrium                | Urogenital System        | Genitalia               | 0.13                     | >=0.20               | 0.55                 | >=0.20               | 0.26              | >=0.20               |
| A11.436.275                     | Endothelial Cells          | Cells                    | Epithelial Cells        | 0.9                      | >=0.20               | 0.98                 | >=0.20               | 0.69              | >=0.20               |
| A11.382.625                     | Enteroendocrine Cells      | Cells                    | Endocrine Cells         | 0.28                     | >=0.20               | 0.95                 | >=0.20               | 0.39              | >=0.20               |

| MeSH term                       | Name                                    | MeSH first level term    | MeSH second level term  | Combined Caffeine intake |                      | Caffeine from Coffee |                      | Caffeine from Tea |                      |
|---------------------------------|-----------------------------------------|--------------------------|-------------------------|--------------------------|----------------------|----------------------|----------------------|-------------------|----------------------|
|                                 |                                         |                          |                         | Nominal P value          | False discovery rate | Nominal P value      | False discovery rate | Nominal P value   | False discovery rate |
| A11.436                         | Epithelial Cells                        | Cells                    | Epithelial Cells        | 0.86                     | >=0.20               | 1                    | >=0.20               | 0.77              | >=0.20               |
| A10.272                         | Epithelium                              | Tissues                  | Epithelium              | 0.21                     | >=0.20               | 0.92                 | >=0.20               | 0.09              | >=0.20               |
| A15.145.229.334                 | Erythrocytes                            | Hemic and Immune Systems | Blood                   | 0.91                     | >=0.20               | 0.56                 | >=0.20               | 0.96              | >=0.20               |
| A11.443                         | Erythroid Cells                         | Cells                    | Erythroid Cells         | 0.92                     | >=0.20               | 0.57                 | >=0.20               | 0.96              | >=0.20               |
| A15.378.316.378.590.837.250     | Erythroid Precursor Cells               | Hemic and Immune Systems | Hematopoietic System    | 0.79                     | >=0.20               | 0.82                 | >=0.20               | 0.37              | >=0.20               |
| A03.556.875.500                 | Esophagus                               | Digestive System         | Gastrointestinal Tract  | 0.31                     | >=0.20               | 0.89                 | >=0.20               | 0.67              | >=0.20               |
| A10.336                         | Exocrine Glands                         | Tissues                  | Exocrine Glands         | 0.11                     | >=0.20               | 0.97                 | >=0.20               | 0.58              | >=0.20               |
| A10.615.284                     | Extraembryonic Membranes                | Tissues                  | Membranes               | 0.64                     | >=0.20               | 0.97                 | >=0.20               | 0.93              | >=0.20               |
| A09.371                         | Eye                                     | Sense Organs             | Eye                     | 0.29                     | >=0.20               | 0.23                 | >=0.20               | 0.05              | >=0.20               |
| A09.371.337                     | Eyelids                                 | Sense Organs             | Eye                     | 0.76                     | >=0.20               | 0.98                 | >=0.20               | 0.36              | >=0.20               |
| A05.360.319.114.373             | Fallopian Tubes                         | Urogenital System        | Genitalia               | 0.19                     | >=0.20               | 0.36                 | >=0.20               | 0.12              | >=0.20               |
| A15.145.300                     | Fetal Blood                             | Hemic and Immune Systems | Blood                   | 0.98                     | >=0.20               | 0.18                 | >=0.20               | 0.96              | >=0.20               |
| A11.329.228                     | Fibroblasts                             | Cells                    | Connective Tissue Cells | 0.27                     | >=0.20               | 0.94                 | >=0.20               | 0.83              | >=0.20               |
| A02.835.232.043.300             | Foot Bones                              | Musculoskeletal System   | Skeleton                | 0.76                     | >=0.20               | 0.97                 | >=0.20               | 0.41              | >=0.20               |
| A05.360.444.492.362             | Foreskin                                | Urogenital System        | Genitalia               | 0.35                     | >=0.20               | 1                    | >=0.20               | 0.75              | >=0.20               |
| A08.186.211.730.885.287.500.270 | Frontal Lobe                            | Nervous System           | Central Nervous System  | 0.39                     | >=0.20               | 0.12                 | >=0.20               | 0.29              | >=0.20               |
| A03.556                         | Gastrointestinal Tract                  | Digestive System         | Gastrointestinal Tract  | 0.47                     | >=0.20               | 0.93                 | >=0.20               | 0.81              | >=0.20               |
| A05.360                         | Genitalia                               | Urogenital System        | Genitalia               | 0.08                     | >=0.20               | 0.82                 | >=0.20               | 0.37              | >=0.20               |
| A05.360.319                     | Genitalia Female                        | Urogenital System        | Genitalia               | 0.13                     | >=0.20               | 0.45                 | >=0.20               | 0.24              | >=0.20               |
| A05.360.444                     | Genitalia Male                          | Urogenital System        | Genitalia               | 0.1                      | >=0.20               | 0.98                 | >=0.20               | 0.57              | >=0.20               |
| A05.360.490                     | Germ Cells                              | Urogenital System        | Genitalia               | 0.32                     | >=0.20               | 0.99                 | >=0.20               | 0.91              | >=0.20               |
| A11.436.294.064                 | Glucagon Secreting Cells                | Cells                    | Epithelial Cells        | 0.28                     | >=0.20               | 0.95                 | >=0.20               | 0.39              | >=0.20               |
| A06.407.312                     | Gonads                                  | Endocrine System         | Endocrine Glands        | 0.13                     | >=0.20               | 0.44                 | >=0.20               | 0.26              | >=0.20               |
| A10.165.450                     | Granulation Tissue                      | Tissues                  | Connective Tissue       | 0.86                     | >=0.20               | 0.81                 | >=0.20               | 0.66              | >=0.20               |
| A11.872.378.590.635             | Granulocyte Macrophage Progenitor Cells | Cells                    | Stem Cells              | 1                        | >=0.20               | 0.76                 | >=0.20               | 0.99              | >=0.20               |
| A11.627.340.360                 | Granulocyte Precursor Cells             | Cells                    | Myeloid Cells           | 0.98                     | >=0.20               | 0.55                 | >=0.20               | 0.6               | >=0.20               |
| A11.118.637.415                 | Granulocytes                            | Cells                    | Blood Cells             | 0.96                     | >=0.20               | 0.42                 | >=0.20               | 0.77              | >=0.20               |
| A11.436.329                     | Granulosa Cells                         | Cells                    | Epithelial Cells        | 0.09                     | >=0.20               | 0.36                 | >=0.20               | 0.99              | >=0.20               |
| A07.541                         | Heart                                   | Cardiovascular System    | Heart                   | 0.77                     | >=0.20               | 0.55                 | >=0.20               | 0.78              | >=0.20               |
| A07.541.358                     | Heart Atria                             | Cardiovascular System    | Heart                   | 0.35                     | >=0.20               | 0.16                 | >=0.20               | 0.65              | >=0.20               |
| A07.541.510                     | Heart Valves                            | Cardiovascular System    | Heart                   | 0.14                     | >=0.20               | 0.35                 | >=0.20               | 0.11              | >=0.20               |
| A07.541.560                     | Heart Ventricles                        | Cardiovascular System    | Heart                   | 0.83                     | >=0.20               | 0.6                  | >=0.20               | 0.83              | >=0.20               |
| A11.872.378                     | Hematopoietic Stem Cells                | Cells                    | Stem Cells              | 0.99                     | >=0.20               | 0.7                  | >=0.20               | 0.85              | >=0.20               |
| A15.378                         | Hematopoietic System                    | Hemic and Immune Systems | Hematopoietic System    | 1                        | >=0.20               | 0.48                 | >=0.20               | 0.93              | >=0.20               |
| A11.436.348                     | Hepatocytes                             | Cells                    | Epithelial Cells        | 0.48                     | >=0.20               | 0.87                 | >=0.20               | 0.82              | >=0.20               |
| A08.186.211.730.317.357.352.435 | Hypothalamo Hypophyseal System          | Nervous System           | Central Nervous System  | 0.27                     | >=0.20               | 0.17                 | >=0.20               | 0.54              | >=0.20               |
| A08.186.211.730.317.357         | Hypothalamus                            | Nervous System           | Central Nervous System  | 0.34                     | >=0.20               | 0.18                 | >=0.20               | 0.53              | >=0.20               |
| A08.186.211.730.317.357.352     | Hypothalamus Middle                     | Nervous System           | Central Nervous System  | 0.27                     | >=0.20               | 0.17                 | >=0.20               | 0.54              | >=0.20               |
| A03.556.249.124                 | Ileum                                   | Digestive System         | Gastrointestinal Tract  | 0.3                      | >=0.20               | 0.76                 | >=0.20               | 0.69              | >=0.20               |

| MeSH term               | Name                                     | MeSH first level term    | MeSH second level term  | Combined Caffeine intake |                      | Caffeine from Coffee |                      | Caffeine from Tea |                      |
|-------------------------|------------------------------------------|--------------------------|-------------------------|--------------------------|----------------------|----------------------|----------------------|-------------------|----------------------|
|                         |                                          |                          |                         | Nominal P value          | False discovery rate | Nominal P value      | False discovery rate | Nominal P value   | False discovery rate |
| A15.382                 | Immune System                            | Hemic and Immune Systems | Immune System           | 0.99                     | >=0.20               | 0.13                 | >=0.20               | 0.96              | >=0.20               |
| A11.872.700.500         | Induced Pluripotent Stem Cells           | Cells                    | Stem Cells              | 0.41                     | >=0.20               | 0.83                 | >=0.20               | 0.35              | >=0.20               |
| A03.556.124.369         | Intestinal Mucosa                        | Digestive System         | Gastrointestinal Tract  | 0.63                     | >=0.20               | 0.99                 | >=0.20               | 0.71              | >=0.20               |
| A03.556.249.249         | Intestine Large                          | Digestive System         | Gastrointestinal Tract  | 0.3                      | >=0.20               | 0.76                 | >=0.20               | 0.74              | >=0.20               |
| A03.556.124.684         | Intestine Small                          | Digestive System         | Gastrointestinal Tract  | 0.52                     | >=0.20               | 0.62                 | >=0.20               | 0.95              | >=0.20               |
| A03.556.124             | Intestines                               | Digestive System         | Gastrointestinal Tract  | 0.37                     | >=0.20               | 0.86                 | >=0.20               | 0.76              | >=0.20               |
| A03.734.414             | Islets of Langerhans                     | Digestive System         | Pancreas                | 0.32                     | >=0.20               | 0.97                 | >=0.20               | 0.47              | >=0.20               |
| A02.835.583.443         | Joint Capsule                            | Musculoskeletal System   | Skeleton                | 0.38                     | >=0.20               | 0.65                 | >=0.20               | 0.98              | >=0.20               |
| A02.835.583             | Joints                                   | Musculoskeletal System   | Skeleton                | 0.38                     | >=0.20               | 0.65                 | >=0.20               | 0.98              | >=0.20               |
| A10.165.450.300.425     | Keloid                                   | Tissues                  | Connective Tissue       | 0.89                     | >=0.20               | 0.86                 | >=0.20               | 0.53              | >=0.20               |
| A11.436.397             | Keratinocytes                            | Cells                    | Epithelial Cells        | 0.99                     | >=0.20               | 1                    | >=0.20               | 0.83              | >=0.20               |
| A05.810.453             | Kidney                                   | Urogenital System        | Urinary Tract           | 0.15                     | >=0.20               | 0.31                 | >=0.20               | 0.52              | >=0.20               |
| A05.810.453.324         | Kidney Cortex                            | Urogenital System        | Urinary Tract           | 0.2                      | >=0.20               | 0.39                 | >=0.20               | 0.89              | >=0.20               |
| A15.382.490.555.567.537 | Killer Cells Natural                     | Hemic and Immune Systems | Immune System           | 0.47                     | >=0.20               | 0.22                 | >=0.20               | 0.67              | >=0.20               |
| A11.118.637             | Leukocytes                               | Cells                    | Blood Cells             | 0.98                     | >=0.20               | 0.13                 | >=0.20               | 0.97              | >=0.20               |
| A15.145.229.637.555     | Leukocytes Mononuclear                   | Hemic and Immune Systems | Blood                   | 0.96                     | >=0.20               | 0.09                 | >=0.20               | 0.98              | >=0.20               |
| A03.620                 | Liver                                    | Digestive System         | Liver                   | 0.05                     | >=0.20               | 0.37                 | >=0.20               | 0.4               | >=0.20               |
| A03.556.249             | Lower Gastrointestinal Tract             | Digestive System         | Gastrointestinal Tract  | 0.3                      | >=0.20               | 0.76                 | >=0.20               | 0.75              | >=0.20               |
| A04.411                 | Lung                                     | Respiratory System       | Lung                    | 0.15                     | >=0.20               | 0.74                 | >=0.20               | 0.42              | >=0.20               |
| A10.549.400             | Lymph Nodes                              | Tissues                  | Lymphoid Tissue         | 0.84                     | >=0.20               | 0.04                 | >=0.20               | 0.8               | >=0.20               |
| A15.382.520             | Lymphatic System                         | Hemic and Immune Systems | Immune System           | 0.76                     | >=0.20               | 0.04                 | >=0.20               | 0.74              | >=0.20               |
| A15.382.490.555.567     | Lymphocytes                              | Hemic and Immune Systems | Immune System           | 0.76                     | >=0.20               | 0.04                 | >=0.20               | 0.95              | >=0.20               |
| A15.382.490.555.567.622 | Lymphocytes Null                         | Hemic and Immune Systems | Immune System           | 0.91                     | >=0.20               | 0.58                 | >=0.20               | 0.49              | >=0.20               |
| A11.872.378.294         | Lymphoid Progenitor Cells                | Cells                    | Stem Cells              | 0.29                     | >=0.20               | 0.06                 | >=0.20               | 0.23              | >=0.20               |
| A10.549                 | Lymphoid Tissue                          | Tissues                  | Lymphoid Tissue         | 0.76                     | >=0.20               | 0.04                 | >=0.20               | 0.74              | >=0.20               |
| A15.382.812.522         | Macrophages                              | Hemic and Immune Systems | Immune System           | 1                        | >=0.20               | 0.88                 | >=0.20               | 0.66              | >=0.20               |
| A11.329.372.600         | Macrophages Alveolar                     | Cells                    | Connective Tissue Cells | 1                        | >=0.20               | 0.79                 | >=0.20               | 0.13              | >=0.20               |
| A11.872.378.590.817     | Megakaryocyte Erythroid Progenitor Cells | Cells                    | Stem Cells              | 0.79                     | >=0.20               | 0.82                 | >=0.20               | 0.37              | >=0.20               |
| A10.615                 | Membranes                                | Tissues                  | Membranes               | 0.45                     | >=0.20               | 1                    | >=0.20               | 0.54              | >=0.20               |
| A08.186.211.653         | Mesencephalon                            | Nervous System           | Central Nervous System  | 0.49                     | >=0.20               | 0.32                 | >=0.20               | 0.26              | >=0.20               |
| A11.872.580             | Mesenchymal Stem Cells                   | Cells                    | Stem Cells              | 0.37                     | >=0.20               | 0.78                 | >=0.20               | 0.87              | >=0.20               |
| A11.627.624.249         | Monocyte Macrophage Precursor Cells      | Cells                    | Myeloid Cells           | 1                        | >=0.20               | 0.78                 | >=0.20               | 1                 | >=0.20               |
| A15.378.316.580         | Monocytes                                | Hemic and Immune Systems | Hematopoietic System    | 1                        | >=0.20               | 0.55                 | >=0.20               | 0.97              | >=0.20               |
| A15.382.812             | Mononuclear Phagocyte System             | Hemic and Immune Systems | Immune System           | 1                        | >=0.20               | 0.62                 | >=0.20               | 0.84              | >=0.20               |
| A14.549                 | Mouth                                    | Stomatognathic System    | Mouth                   | 0.8                      | >=0.20               | 0.99                 | >=0.20               | 0.81              | >=0.20               |
| A10.615.550.599         | Mouth Mucosa                             | Tissues                  | Membranes               | 0.46                     | >=0.20               | 0.96                 | >=0.20               | 0.38              | >=0.20               |
| A10.615.550             | Mucous Membrane                          | Tissues                  | Membranes               | 0.47                     | >=0.20               | 0.99                 | >=0.20               | 0.4               | >=0.20               |
| A10.690.552.500         | Muscle Skeletal                          | Tissues                  | Muscles                 | 0.84                     | >=0.20               | 0.27                 | >=0.20               | 0.92              | >=0.20               |

| MeSH term                       | Name                       | MeSH first level term    | MeSH second level term  | Combined Caffeine intake |                      | Caffeine from Coffee |                      | Caffeine from Tea |                      |
|---------------------------------|----------------------------|--------------------------|-------------------------|--------------------------|----------------------|----------------------|----------------------|-------------------|----------------------|
|                                 |                            |                          |                         | Nominal P value          | False discovery rate | Nominal P value      | False discovery rate | Nominal P value   | False discovery rate |
| A10.690.467                     | Muscle Smooth              | Tissues                  | Muscles                 | 0.99                     | >=0.20               | 0.99                 | >=0.20               | 0.95              | >=0.20               |
| A10.690.552                     | Muscle Striated            | Tissues                  | Muscles                 | 0.84                     | >=0.20               | 0.27                 | >=0.20               | 0.92              | >=0.20               |
| A11.620                         | Muscle Cells               | Cells                    | Muscle Cells            | 1                        | >=0.20               | 1                    | >=0.20               | 0.99              | >=0.20               |
| A10.690                         | Muscles                    | Tissues                  | Muscles                 | 0.93                     | >=0.20               | 0.49                 | >=0.20               | 0.96              | >=0.20               |
| A11.627                         | Myeloid Cells              | Cells                    | Myeloid Cells           | 1                        | >=0.20               | 0.61                 | >=0.20               | 0.87              | >=0.20               |
| A11.627.635                     | Myeloid Progenitor Cells   | Cells                    | Myeloid Cells           | 0.99                     | >=0.20               | 0.82                 | >=0.20               | 0.92              | >=0.20               |
| A11.620.520                     | Myocytes Smooth Muscle     | Cells                    | Muscle Cells            | 1                        | >=0.20               | 1                    | >=0.20               | 0.99              | >=0.20               |
| A05.360.319.679.690             | Myometrium                 | Urogenital System        | Genitalia               | 0.04                     | >=0.20               | 0.26                 | >=0.20               | 0.16              | >=0.20               |
| A04.531.520                     | Nasal Mucosa               | Respiratory System       | Nose                    | 0.22                     | >=0.20               | 0.84                 | >=0.20               | 0.23              | >=0.20               |
| A14.724.557                     | Nasopharynx                | Stomatognathic System    | Pharynx                 | 1                        | >=0.20               | 0.8                  | >=0.20               | 0.51              | >=0.20               |
| A08.713                         | Neurosecretory Systems     | Nervous System           | Neurosecretory Systems  | 0.27                     | >=0.20               | 0.17                 | >=0.20               | 0.54              | >=0.20               |
| A15.382.490.315.583             | Neutrophils                | Hemic and Immune Systems | Immune System           | 0.95                     | >=0.20               | 0.41                 | >=0.20               | 0.76              | >=0.20               |
| A09.531                         | Nose                       | Sense Organs             | Nose                    | 0.22                     | >=0.20               | 0.84                 | >=0.20               | 0.23              | >=0.20               |
| A11.497.497.600                 | Oocytes                    | Cells                    | Germ Cells              | 0.12                     | >=0.20               | 0.95                 | >=0.20               | 0.75              | >=0.20               |
| A04.623.603                     | Oropharynx                 | Respiratory System       | Pharynx                 | 0.75                     | >=0.20               | 0.1                  | >=0.20               | 0.61              | >=0.20               |
| A11.329.629                     | Osteoblasts                | Cells                    | Connective Tissue Cells | 0.54                     | >=0.20               | 0.63                 | >=0.20               | 0.55              | >=0.20               |
| A05.360.319.114.630.535         | Ovarian Follicle           | Urogenital System        | Genitalia               | 0.09                     | >=0.20               | 0.36                 | >=0.20               | 0.99              | >=0.20               |
| A05.360.319.114.630             | Ovary                      | Urogenital System        | Genitalia               | 0.14                     | >=0.20               | 0.37                 | >=0.20               | 0.24              | >=0.20               |
| A05.360.490.690                 | Ovum                       | Urogenital System        | Genitalia               | 0.12                     | >=0.20               | 0.95                 | >=0.20               | 0.75              | >=0.20               |
| A15.382.520.604.800             | Palatine Tonsil            | Hemic and Immune Systems | Immune System           | 0.75                     | >=0.20               | 0.1                  | >=0.20               | 0.61              | >=0.20               |
| A03.734                         | Pancreas                   | Digestive System         | Pancreas                | 0.19                     | >=0.20               | 0.75                 | >=0.20               | 0.28              | >=0.20               |
| A08.186.211.730.885.287.500.670 | Parietal Lobe              | Nervous System           | Central Nervous System  | 0.08                     | >=0.20               | 9.67E-03             | >=0.20               | 0.12              | >=0.20               |
| A03.556.500.760.464             | Parotid Gland              | Digestive System         | Gastrointestinal Tract  | 0.52                     | >=0.20               | 0.73                 | >=0.20               | 0.97              | >=0.20               |
| A05.360.444.492                 | Penis                      | Urogenital System        | Genitalia               | 0.34                     | >=0.20               | 1                    | >=0.20               | 0.75              | >=0.20               |
| A14.549.167.646                 | Periodontium               | Stomatognathic System    | Mouth                   | 0.92                     | >=0.20               | 0.89                 | >=0.20               | 0.8               | >=0.20               |
| A15.382.680                     | Phagocytes                 | Hemic and Immune Systems | Immune System           | 1                        | >=0.20               | 0.59                 | >=0.20               | 0.87              | >=0.20               |
| A14.724                         | Pharynx                    | Stomatognathic System    | Pharynx                 | 1                        | >=0.20               | 0.54                 | >=0.20               | 0.57              | >=0.20               |
| A15.145.693                     | Plasma                     | Hemic and Immune Systems | Blood                   | 0.87                     | >=0.20               | 0.15                 | >=0.20               | 0.99              | >=0.20               |
| A15.145.229.637.555.567.562.725 | Plasma Cells               | Hemic and Immune Systems | Blood                   | 0.87                     | >=0.20               | 0.16                 | >=0.20               | 0.99              | >=0.20               |
| A11.872.700                     | Pluripotent Stem Cells     | Cells                    | Stem Cells              | 0.41                     | >=0.20               | 0.83                 | >=0.20               | 0.35              | >=0.20               |
| A07.231.908.670                 | Portal System              | Cardiovascular System    | Blood Vessels           | 0.89                     | >=0.20               | 0.95                 | >=0.20               | 0.53              | >=0.20               |
| A11.118.637.555.567.562.440     | Precursor Cells B Lymphoid | Cells                    | Blood Cells             | 0.29                     | >=0.20               | 0.06                 | >=0.20               | 0.23              | >=0.20               |
| A10.336.707                     | Prostate                   | Tissues                  | Exocrine Glands         | 0.11                     | >=0.20               | 0.96                 | >=0.20               | 0.53              | >=0.20               |
| A02.633.567.850                 | Quadriceps Muscle          | Musculoskeletal System   | Muscles                 | 0.85                     | >=0.20               | 0.26                 | >=0.20               | 0.93              | >=0.20               |
| A03.556.124.526.767             | Rectum                     | Digestive System         | Gastrointestinal Tract  | 0.58                     | >=0.20               | 0.51                 | >=0.20               | 0.98              | >=0.20               |
| A10.615.550.760                 | Respiratory Mucosa         | Tissues                  | Membranes               | 0.22                     | >=0.20               | 0.84                 | >=0.20               | 0.23              | >=0.20               |
| A03.556.500.760                 | Salivary Glands            | Digestive System         | Gastrointestinal Tract  | 0.6                      | >=0.20               | 0.73                 | >=0.20               | 0.98              | >=0.20               |
| A10.615.789                     | Serous Membrane            | Tissues                  | Membranes               | 0.39                     | >=0.20               | 0.69                 | >=0.20               | 0.61              | >=0.20               |
| A15.145.846                     | Serum                      | Hemic and Immune Systems | Blood                   | 0.92                     | >=0.20               | 0.95                 | >=0.20               | 0.85              | >=0.20               |

| MeSH term                       | Name                         | MeSH first level term    | MeSH second level term  | Combined Caffeine intake |                      | Caffeine from Coffee |                      | Caffeine from Tea |                      |
|---------------------------------|------------------------------|--------------------------|-------------------------|--------------------------|----------------------|----------------------|----------------------|-------------------|----------------------|
|                                 |                              |                          |                         | Nominal P value          | False discovery rate | Nominal P value      | False discovery rate | Nominal P value   | False discovery rate |
| A02.835                         | Skeleton                     | Musculoskeletal System   | Skeleton                | 0.98                     | >=0.20               | 0.21                 | >=0.20               | 0.96              | >=0.20               |
| A17.815                         | Skin                         | Integumentary System     | Skin                    | 0.28                     | >=0.20               | 0.99                 | >=0.20               | 0.25              | >=0.20               |
| A02.835.232.834                 | Spine                        | Musculoskeletal System   | Skeleton                | 0.36                     | >=0.20               | 0.75                 | >=0.20               | 0.48              | >=0.20               |
| A15.382.520.604.700             | Spleen                       | Hemic and Immune Systems | Immune System           | 0.1                      | >=0.20               | 0.19                 | >=0.20               | 0.4               | >=0.20               |
| A11.872                         | Stem Cells                   | Cells                    | Stem Cells              | 0.81                     | >=0.20               | 0.79                 | >=0.20               | 0.66              | >=0.20               |
| A03.556.875.875                 | Stomach                      | Digestive System         | Gastrointestinal Tract  | 0.35                     | >=0.20               | 0.64                 | >=0.20               | 0.71              | >=0.20               |
| A11.329.830                     | Stromal Cells                | Cells                    | Connective Tissue Cells | 0.49                     | >=0.20               | 0.94                 | >=0.20               | 0.87              | >=0.20               |
| A10.165.114.830.750             | Subcutaneous Fat             | Tissues                  | Connective Tissue       | 0.6                      | >=0.20               | 0.55                 | >=0.20               | 0.23              | >=0.20               |
| A10.165.114.830.500.750         | Subcutaneous Fat Abdominal   | Tissues                  | Connective Tissue       | 0.68                     | >=0.20               | 0.56                 | >=0.20               | 0.26              | >=0.20               |
| A02.835.583.443.800.800         | Synovial Fluid               | Musculoskeletal System   | Skeleton                | 0.72                     | >=0.20               | 0.2                  | >=0.20               | 0.84              | >=0.20               |
| A02.835.583.443.800             | Synovial Membrane            | Musculoskeletal System   | Skeleton                | 0.38                     | >=0.20               | 0.65                 | >=0.20               | 0.98              | >=0.20               |
| A11.118.637.555.567.569         | T Lymphocytes                | Cells                    | Blood Cells             | 0.6                      | >=0.20               | 0.08                 | >=0.20               | 0.68              | >=0.20               |
| A11.118.637.555.567.569.200.700 | T Lymphocytes Regulatory     | Cells                    | Blood Cells             | 0.23                     | >=0.20               | 0.1                  | >=0.20               | 0.24              | >=0.20               |
| A02.835.232.043.300.710         | Tarsal Bones                 | Musculoskeletal System   | Skeleton                | 0.76                     | >=0.20               | 0.97                 | >=0.20               | 0.41              | >=0.20               |
| A06.407.312.782                 | Testis                       | Endocrine System         | Endocrine Glands        | 0.31                     | >=0.20               | 0.93                 | >=0.20               | 0.57              | >=0.20               |
| A06.407.900                     | Thyroid Gland                | Endocrine System         | Endocrine Glands        | 0.16                     | >=0.20               | 0.23                 | >=0.20               | 0.41              | >=0.20               |
| A14.549.885                     | Tongue                       | Stomatognathic System    | Mouth                   | 0.98                     | >=0.20               | 0.99                 | >=0.20               | 0.98              | >=0.20               |
| A07.231.908.670.874             | Umbilical Veins              | Cardiovascular System    | Blood Vessels           | 0.89                     | >=0.20               | 0.95                 | >=0.20               | 0.53              | >=0.20               |
| A03.556.875                     | Upper Gastrointestinal Tract | Digestive System         | Gastrointestinal Tract  | 0.39                     | >=0.20               | 0.75                 | >=0.20               | 0.77              | >=0.20               |
| A05.810.890                     | Urinary Bladder              | Urogenital System        | Urinary Tract           | 0.65                     | >=0.20               | 0.47                 | >=0.20               | 0.83              | >=0.20               |
| A05.810                         | Urinary Tract                | Urogenital System        | Urinary Tract           | 0.16                     | >=0.20               | 0.32                 | >=0.20               | 0.54              | >=0.20               |
| A05.360.319.679                 | Uterus                       | Urogenital System        | Genitalia               | 0.16                     | >=0.20               | 0.53                 | >=0.20               | 0.37              | >=0.20               |
| A07.231.908                     | Veins                        | Cardiovascular System    | Blood Vessels           | 0.92                     | >=0.20               | 0.95                 | >=0.20               | 0.65              | >=0.20               |
| A05.360.319.887                 | Vulva                        | Urogenital System        | Genitalia               | 0.83                     | >=0.20               | 0.99                 | >=0.20               | 0.56              | >=0.20               |

**Table S19. Functional eQTL genes associated with caffeine intake**

| GWAS SNP           | Caffeine Trait       | probe ID           | Probe Chr | Gene    | Probe position | eQTL SNP    | eQTL SNP Chr | eQTL SNP position | EF AL | NE FA L | EF Freq  | Beta GWAS | SE GWA S   | P GW AS  | Beta eQTL | SE eQT L  | P eQT L   | Beta SMR   | SE SMR     | P SM R   | P HEID I   | eQTL repository                         |
|--------------------|----------------------|--------------------|-----------|---------|----------------|-------------|--------------|-------------------|-------|---------|----------|-----------|------------|----------|-----------|-----------|-----------|------------|------------|----------|------------|-----------------------------------------|
| rs768283768        | Combined Caffeine    | ENSG00000143452.11 | 1         | HORMAD1 | 150681950      | rs11587444  | 1            | 150722844         | G     | A       | 0.396321 | 0.0234978 | 0.00237896 | 5.20E-23 | 1.1957    | 0.0565677 | 3.60E-99  | 0.0196519  | 0.0021961  | 3.60E-19 | 0.1070597  | GTEEx - Nerve Tibial                    |
| rs768283768        | Combined Caffeine    | ENSG00000143452.11 | 1         | HORMAD1 | 150681950      | rs11204717  | 1            | 150709129         | A     | T       | 0.394263 | 0.0231968 | 0.00237641 | 1.70E-22 | 1.10797   | 0.0508788 | 3.86E-105 | 0.0209363  | 0.00235045 | 5.23E-19 | 0.2278421  | GTEEx - Skin Sun Exposed Lower leg      |
| rs768283768        | Combined Caffeine    | ENSG00000143452.11 | 1         | HORMAD1 | 150681950      | rs11204718  | 1            | 150709785         | G     | C       | 0.394263 | 0.0231956 | 0.00237643 | 1.70E-22 | 1.12726   | 0.0529239 | 1.14E-100 | 0.020577   | 0.00231896 | 7.10E-19 | 0.1377202  | GTEEx - Esophagus Mucosa                |
| rs768283768        | Combined Caffeine    | ENSG00000143457.6  | 1         | GOLPH3L | 150644165      | rs11587444  | 1            | 150722844         | G     | A       | 0.396321 | 0.0234978 | 0.00237896 | 5.20E-23 | 0.88578   | 0.0470777 | 5.66E-79  | 0.0265278  | 0.00303331 | 2.22E-18 | 0.1119635  | GTEEx - Nerve Tibial                    |
| rs768283768        | Combined Caffeine    | ENSG00000143452.11 | 1         | HORMAD1 | 150681950      | rs7529194   | 1            | 150622620         | A     | T       | 0.394    | 0.0230701 | 0.00237586 | 2.70E-22 | 1.06836   | 0.0572195 | 8.48E-78  | 0.0215939  | 0.0025066  | 7.00E-18 | 0.147406   | GTEEx - Skin Not Sun Exposed Suprapubic |
| rs768283768        | Combined Caffeine    | ENSG00000143457.6  | 1         | GOLPH3L | 150644165      | rs1134067   | 1            | 150721175         | T     | G       | 0.39639  | 0.0235077 | 0.00237826 | 4.90E-23 | 0.788672  | 0.0455441 | 3.52E-67  | 0.0298067  | 0.0034722  | 9.13E-18 | 0.1489021  | GTEEx - Skin Sun Exposed Lower leg      |
| rs768283768        | Combined Caffeine    | ENSG00000143452.11 | 1         | HORMAD1 | 150681950      | rs111842513 | 1            | 150712926         | A     | G       | 0.394263 | 0.0232029 | 0.0023766  | 1.60E-22 | 0.921119  | 0.0574382 | 7.08E-58  | 0.0251899  | 0.00302065 | 7.48E-17 | 0.3795036  | GTEEx - Adipose Subcutaneous            |
| rs768283768        | Combined Caffeine    | ENSG00000143452.11 | 1         | HORMAD1 | 150681950      | rs72704603  | 1            | 150707992         | T     | C       | 0.394263 | 0.0232622 | 0.00237665 | 1.30E-22 | 0.950796  | 0.0623663 | 1.77E-52  | 0.024466   | 0.00297046 | 1.77E-16 | 0.2328227  | GTEEx - Cells Transformed fibroblasts   |
| 7:73042302_GCTTT_G | Combined Caffeine    | ENSG00000009950.11 | 7         | MLXIP L | 73023198       | rs34060476  | 7            | 73037956          | G     | A       | 0.146685 | 0.0353479 | 0.00340377 | 2.90E-25 | 0.796108  | 0.0658142 | 1.10E-33  | 0.0444009  | 0.00563502 | 3.29E-15 | 0.07818656 | GTEEx - Skin Sun Exposed Lower leg      |
| 7:73042302_GCTTT_G | Combined Caffeine    | ENSG00000009950.11 | 7         | MLXIP L | 73023198       | rs34060476  | 7            | 73037956          | G     | A       | 0.146685 | 0.0353479 | 0.00340377 | 2.90E-25 | 0.753091  | 0.0680875 | 1.95E-28  | 0.0469371  | 0.0061997  | 3.71E-14 | 0.1286897  | GTEEx - Thyroid                         |
| rs6062679          | Combined Caffeine    | ENSG00000203880.7  | 20        | PCMTD2  | 62906974       | rs1808056   | 20           | 62890932          | A     | G       | 0.457023 | 0.0227612 | 0.00235819 | 4.80E-22 | -0.27819  | 0.0258003 | 4.17E-27  | -0.0818189 | 0.0113771  | 6.41E-13 | 0.6371555  | GTEEx - Thyroid                         |
| rs768283768        | Combined Caffeine    | ENSG00000143452.11 | 1         | HORMAD1 | 150681950      | rs11204698  | 1            | 150659545         | A     | G       | 0.394    | 0.0230793 | 0.00237565 | 2.60E-22 | 0.756408  | 0.0835393 | 1.37E-19  | 0.0305117  | 0.00460645 | 3.50E-11 | 0.3133836  | GTEEx - Breast Mammary Tissue           |
| rs768283768        | Combined Caffeine    | ENSG00000143452.11 | 1         | HORMAD1 | 150681950      | rs7533678   | 1            | 150699586         | C     | T       | 0.40527  | 0.0227913 | 0.00236385 | 5.30E-22 | 0.550309  | 0.0612163 | 2.48E-19  | 0.0414155  | 0.00629891 | 4.86E-11 | 0.05189475 | GTEEx - Thyroid                         |
| rs768283768        | Combined Caffeine    | ENSG00000143457.6  | 1         | GOLPH3L | 150644165      | rs6685702   | 1            | 150656307         | G     | A       | 0.405    | 0.0227773 | 0.00236378 | 5.60E-22 | 0.250716  | 0.0279988 | 3.41E-19  | 0.090849   | 0.01385    | 5.40E-11 | 0.07505418 | GTEEx - Esophagus Mucosa                |
| 7:73042302_GCTTT_G | Combined Caffeine    | ENSG00000009950.11 | 7         | MLXIP L | 73023198       | rs34763247  | 7            | 72866616          | T     | A       | 0.139333 | 0.0340615 | 0.0035132  | 3.20E-22 | 0.666216  | 0.0777223 | 1.02E-17  | 0.0511268  | 0.00796144 | 1.35E-10 | 0.2345691  | GTEEx - Pancreas                        |
| rs768283768        | Combined Caffeine    | ENSG00000163131.6  | 1         | CTSS    | 150720552      | rs868751    | 1            | 150669414         | G     | T       | 0.394    | 0.023091  | 0.00237564 | 2.50E-22 | 0.416326  | 0.0487067 | 1.26E-17  | 0.0554637  | 0.00864091 | 1.37E-10 | 0.1221481  | GTEEx - Liver                           |
| rs34060476         | Caffeine from Coffee | ENSG00000009950.11 | 7         | MLXIP L | 73023198       | rs34060476  | 7            | 73037956          | G     | A       | 0.146685 | 0.0251884 | 0.00336487 | 7.10E-14 | 0.796108  | 0.0658142 | 1.10E-33  | 0.0316394  | 0.00497052 | 1.95E-10 | 0.120355   | GTEEx - Skin Sun Exposed Lower leg      |
| 7:73042302_GCTTT_G | Combined Caffeine    | ENSG00000009950.11 | 7         | MLXIP L | 73023198       | rs13235543  | 7            | 73013901          | T     | C       | 0.141667 | 0.0343207 | 0.00344971 | 2.60E-23 | 0.541017  | 0.0662661 | 3.23E-16  | 0.0634374  | 0.0100515  | 2.77E-10 | 0.09963132 | GTEEx - Esophagus Muscularis            |
| rs6062679          | Combined Caffeine    | ENSG00000203880.7  | 20        | PCMTD2  | 62906974       | rs1808056   | 20           | 62890932          | A     | G       | 0.457023 | 0.0227612 | 0.00235819 | 4.80E-22 | -0.263918 | 0.0320418 | 1.77E-16  | -0.0862435 | 0.013765   | 3.72E-10 | 0.3796367  | GTEEx - Esophagus Muscularis            |
| rs9624470          | Caffeine from Tea    | ENSG00000100024    | 22        | UPB1    | 24893782       | rs1041750   | 22           | 24847606          | A     | T       | 0.611333 | 0.0235842 | 0.00228676 | 6.10E-25 | -0.550949 | 0.0698889 | 3.19E-15  | -0.0428065 | 0.0068347  | 3.77E-10 | 0.1232167  | Brain-eMeta                             |
| rs9624470          | Caffeine from Tea    | ENSG00000100024.10 | 22        | UPB1    | 24893782       | rs1041750   | 22           | 24847606          | A     | T       | 0.611333 | 0.0235842 | 0.00228676 | 6.10E-25 | -0.550949 | 0.0698889 | 3.19E-15  | -0.0428065 | 0.0068347  | 3.77E-10 | 0.1232167  | GTEEx Brain                             |
| rs768283768        | Combined Caffeine    | ENSG00000143452.11 | 1         | HORMAD1 | 150681950      | rs7524620   | 1            | 150616699         | G     | A       | 0.406774 | 0.0229777 | 0.00236672 | 2.80E-22 | 1.00072   | 0.123587  | 5.62E-16  | 0.0229612  | 0.00369246 | 5.02E-10 | 0.0695423  | GTEEx - Vagina                          |
| rs34060476         | Caffeine from Coffee | ENSG00000009950.11 | 7         | MLXIP L | 73023198       | rs34060476  | 7            | 73037956          | G     | A       | 0.146685 | 0.0251884 | 0.00336487 | 7.10E-14 | 0.753091  | 0.0680875 | 1.95E-28  | 0.0334467  | 0.00539518 | 5.67E-10 | 0.1378098  | GTEEx - Thyroid                         |
| rs6062679          | Combined Caffeine    | ENSG00000203880.7  | 20        | PCMTD2  | 62906974       | rs1808056   | 20           | 62890932          | A     | G       | 0.457023 | 0.0227612 | 0.00235819 | 4.80E-22 | -0.229143 | 0.0286915 | 1.39E-15  | -0.0993319 | 0.0161433  | 7.60E-10 | 0.3140653  | GTEEx - Adipose Subcutaneous            |



| GWAS SNP         | Caffeine Trait       | probe ID           | Probe Chr | Gene    | Probe position | eQTL SNP    | eQTL SNP Chr | eQTL SNP position | EF AL | NE FA L | EF Freq  | Beta GWAS  | SE GWA S   | P GW AS  | Beta eQTL | SE eQT L  | P eQT L   | Beta SMR   | SE SMR     | P SM R   | P HEID I   | eQTL repository                             |
|------------------|----------------------|--------------------|-----------|---------|----------------|-------------|--------------|-------------------|-------|---------|----------|------------|------------|----------|-----------|-----------|-----------|------------|------------|----------|------------|---------------------------------------------|
| rs768283768      | Combined Caffeine    | ENSG00000143418.15 | 1         | CERS2   | 150941903      | rs2867300   | 1            | 150666990         | C     | G       | 0.405    | 0.0227913  | 0.0023639  | 5.30E-22 | 0.46562   | 0.0585626 | 1.85E-15  | 0.0489483  | 0.00797972 | 8.57E-10 | 0.1157918  | GTEEx - Brain Cerebellum                    |
| rs6062679        | Combined Caffeine    | ENSG00000203880.7  | 20        | PCMTD2  | 62906974       | rs1808056   | 20           | 62890932          | A     | G       | 0.457023 | 0.0227612  | 0.00235819 | 4.80E-22 | -0.326626 | 0.0435156 | 6.10E-14  | -0.0696858 | 0.011761   | 3.12E-09 | 0.3331977  | GTEEx - Esophagus Gastroesophageal Junction |
| rs2521501        | Caffeine from Coffee | ILMN_1693650       | 15        | FES     | 91438855       | rs2521501   | 15           | 91437388          | T     | A       | 0.339029 | -0.0149164 | 0.002472   | 1.60E-09 | -0.457456 | 0.0196169 | 2.81E-120 | 0.0326073  | 0.00558178 | 5.17E-09 | 0.8210296  | Westra                                      |
| rs768283768      | Combined Caffeine    | ENSG00000143418.15 | 1         | CERS2   | 150941903      | rs17658705  | 1            | 150678071         | T     | G       | 0.405    | 0.022792   | 0.00236378 | 5.30E-22 | 0.169654  | 0.0232326 | 2.83E-13  | 0.134344   | 0.0230778  | 5.84E-09 | 0.0773745  | GTEEx - Adipose Subcutaneous                |
| rs768283768      | Combined Caffeine    | ENSG00000143452.11 | 1         | HORMAD1 | 150681950      | rs11204705  | 1            | 150672223         | T     | G       | 0.405    | 0.0227919  | 0.00236378 | 5.30E-22 | 0.393616  | 0.0547792 | 6.70E-13  | 0.0579039  | 0.01005    | 8.33E-09 | 0.06568804 | GTEEx - Muscle Skeletal                     |
| rs9624470        | Caffeine from Tea    | ENSG00000100024.10 | 22        | UPB1    | 24893782       | rs1008932   | 22           | 24855182          | T     | C       | 0.613    | 0.0234215  | 0.00228758 | 1.30E-24 | -0.282294 | 0.0411528 | 6.90E-12  | -0.0829685 | 0.0145588  | 1.21E-08 | 0.1022363  | GTEEx - Lung                                |
| rs11204711       | Caffeine from Tea    | ENSG00000143452.11 | 1         | HORMAD1 | 150681950      | rs7529194   | 1            | 150622620         | A     | T       | 0.394    | 0.0136362  | 0.00228609 | 2.40E-09 | 1.06836   | 0.0572195 | 8.48E-78  | 0.0127637  | 0.00224635 | 1.33E-08 | 0.06575839 | GTEEx - Skin Not Sun Exposed Suprapubic     |
| rs11204711       | Caffeine from Tea    | ENSG00000143452.11 | 1         | HORMAD1 | 150681950      | rs11204717  | 1            | 150709129         | A     | T       | 0.394263 | 0.0134274  | 0.00228667 | 4.30E-09 | 1.10797   | 0.0508788 | 3.86E-105 | 0.0121189  | 0.00213755 | 1.43E-08 | 0.1723868  | GTEEx - Skin Sun Exposed Lower leg          |
| rs11204711       | Caffeine from Tea    | ENSG00000143452.11 | 1         | HORMAD1 | 150681950      | rs11204718  | 1            | 150709785         | G     | C       | 0.394263 | 0.0134292  | 0.00228668 | 4.30E-09 | 1.12726   | 0.0529239 | 1.14E-100 | 0.0119131  | 0.00210422 | 1.50E-08 | 0.07798458 | GTEEx - Esophagus Mucosa                    |
| rs11204711       | Caffeine from Tea    | ENSG00000143457.6  | 1         | GOLPH3L | 150644165      | rs1134067   | 1            | 150721175         | T     | G       | 0.39639  | 0.0136748  | 0.00228844 | 2.30E-09 | 0.788672  | 0.0455441 | 3.52E-67  | 0.017339   | 0.00306954 | 1.62E-08 | 0.09304391 | GTEEx - Skin Sun Exposed Lower leg          |
| rs9624470        | Caffeine from Tea    | ENSG00000100024.10 | 22        | UPB1    | 24893782       | rs9624470   | 22           | 24820268          | A     | G       | 0.579127 | 0.0253437  | 0.00227204 | 6.80E-29 | -0.300833 | 0.0459905 | 6.10E-11  | -0.0842451 | 0.0149303  | 1.68E-08 | 0.2396185  | GTEEx - Muscle Skeletal                     |
| rs9611527        | Combined Caffeine    | ENSG00000100401.15 | 22        | RANGAP1 | 41661935       | rs6002310   | 22           | 41675126          | G     | A       | 0.344043 | -0.0193024 | 0.00246584 | 5.00E-15 | -0.219437 | 0.0269815 | 4.19E-16  | 0.0879633  | 0.0155966  | 1.70E-08 | 0.2792009  | GTEEx - Esophagus Mucosa                    |
| rs9624470        | Caffeine from Tea    | ENSG00000100024.10 | 22        | UPB1    | 24893782       | rs11703648  | 22           | 24843886          | G     | C       | 0.584    | 0.0249661  | 0.00226437 | 2.90E-28 | -0.603932 | 0.0936659 | 1.14E-10  | -0.0413393 | 0.00742728 | 2.61E-08 | 0.2119155  | GTEEx - Brain Putamen basal ganglia         |
| rs11204711       | Caffeine from Tea    | ENSG00000143452.11 | 1         | HORMAD1 | 150681950      | rs111842513 | 1            | 150712926         | A     | G       | 0.394263 | 0.0134291  | 0.00228685 | 4.30E-09 | 0.921119  | 0.0574382 | 7.08E-58  | 0.0145791  | 0.0026439  | 3.50E-08 | 0.1929549  | GTEEx - Adipose Subcutaneous                |
| 16:18776851_G_GA | Combined Caffeine    | ILMN_1708416       | 16        | ARL6IP1 | 18803495       | rs11640850  | 16           | 18823607          | A     | G       | 0.378333 | -0.013592  | 0.0023763  | 1.10E-08 | -0.568952 | 0.0282008 | 1.62E-90  | 0.0238895  | 0.00434124 | 3.74E-08 | 0.7615016  | CAGE                                        |
| rs11204711       | Caffeine from Tea    | ENSG00000143452.11 | 1         | HORMAD1 | 150681950      | rs72704603  | 1            | 150707992         | T     | C       | 0.394263 | 0.0134578  | 0.00228692 | 4.00E-09 | 0.950796  | 0.0623663 | 1.77E-52  | 0.0141542  | 0.00257824 | 4.02E-08 | 0.1913184  | GTEEx - Cells Transformed fibroblasts       |
| rs768283768      | Caffeine from Coffee | ILMN_1743032       | 1         | CTSS    | 150702936      | rs2867301   | 1            | 150653795         | T     | C       | 0.405    | 0.0129773  | 0.00233671 | 2.80E-08 | 0.496667  | 0.0185951 | 3.64E-157 | 0.0261288  | 0.00480541 | 5.41E-08 | 0.367449   | Westra                                      |
| rs6062679        | Combined Caffeine    | ENSG00000203880.7  | 20        | PCMTD2  | 62906974       | rs6062679   | 20           | 62889991          | C     | T       | 0.456993 | 0.0227779  | 0.00235823 | 4.50E-22 | -0.344557 | 0.05249   | 5.23E-11  | -0.0661078 | 0.0121765  | 5.66E-08 | 0.6792679  | GTEEx - Pancreas                            |
| rs768283768      | Caffeine from Coffee | ILMN_1743032       | 1         | CTSS    | 150702936      | rs1977715   | 1            | 150675147         | G     | A       | 0.405    | 0.0129724  | 0.00233671 | 2.80E-08 | 0.630879  | 0.0283742 | 1.60E-109 | 0.0205624  | 0.00381761 | 7.20E-08 | 0.06656519 | CAGE                                        |
| rs34060476       | Caffeine from Coffee | ENSG0000009950.11  | 7         | MLXIP L | 73023198       | rs34763247  | 7            | 72866616          | T     | A       | 0.139333 | 0.0240415  | 0.00347404 | 4.50E-12 | 0.666216  | 0.0777223 | 1.02E-17  | 0.0360866  | 0.00670191 | 7.26E-08 | 0.2448739  | GTEEx - Pancreas                            |
| rs73053413       | Caffeine from Tea    | ENSG00000111215.7  | 12        | PRR4    | 11150885       | rs10772395  | 12           | 11128666          | T     | C       | 0.831333 | 0.0206226  | 0.00299459 | 5.70E-12 | -0.710679 | 0.0829164 | 1.03E-17  | -0.0290182 | 0.00540533 | 7.94E-08 | 0.1335246  | GTEEx - Cells Transformed fibroblasts       |
| rs73053413       | Caffeine from Tea    | ENSG00000212125.2  | 12        | TAS2R15 | 11117487       | rs1669411   | 12           | 11338614          | G     | A       | 0.833667 | 0.0215404  | 0.0030102  | 8.30E-13 | -0.583853 | 0.0720713 | 5.45E-16  | -0.0368935 | 0.00687911 | 8.18E-08 | 0.2270893  | GTEEx - Nerve Tibial                        |

| GWAS SNP           | Caffeine Trait       | probe ID           | Probe Chr | Gene        | Probe position | eQTL SNP    | eQTL SNP Chr | eQTL SNP position | EF AL | NE FAL | EF Freq  | Beta GWAS  | SE GWA S   | P GW AS  | Beta eQTL | SE eQT L  | P eQT L   | Beta SMR   | SE SMR     | P SM R   | P HEIDI    | eQTL repository                             |
|--------------------|----------------------|--------------------|-----------|-------------|----------------|-------------|--------------|-------------------|-------|--------|----------|------------|------------|----------|-----------|-----------|-----------|------------|------------|----------|------------|---------------------------------------------|
| rs73053413         | Caffeine from Tea    | ENSG00000212125.2  | 12        | TAS2R15     | 11117487       | rs187328    | 12           | 11331479          | C     | T      | 0.833889 | 0.0215481  | 0.00301052 | 8.20E-13 | -0.570406 | 0.0713309 | 1.28E-15  | -0.0377768 | 0.00708328 | 9.65E-08 | 0.1048308  | GTEEx - Lung                                |
| rs768283768        | Combined Caffeine    | ENSG00000143452.11 | 1         | HORMAD1     | 150681950      | rs11204694  | 1            | 150653391         | A     | G      | 0.394    | 0.0231206  | 0.00237574 | 2.20E-22 | 0.593578  | 0.0935545 | 2.23E-10  | 0.0389512  | 0.0073286  | 1.07E-07 | 0.07874566 | GTEEx - Colon Sigmoid                       |
| rs768283768        | Combined Caffeine    | ENSG00000143452.11 | 1         | HORMAD1     | 150681950      | rs6685702   | 1            | 150656307         | G     | A      | 0.405    | 0.0227773  | 0.00236378 | 5.60E-22 | 0.462113  | 0.0725196 | 1.86E-10  | 0.0492895  | 0.00927337 | 1.07E-07 | 0.2066777  | GTEEx - Esophagus Muscularis                |
| rs34060476         | Caffeine from Coffee | ENSG00000009950.11 | 7         | MLXIP L     | 73023198       | rs13235543  | 7            | 73013901          | T     | C      | 0.141667 | 0.0238165  | 0.00341046 | 2.90E-12 | 0.541017  | 0.0662661 | 3.23E-16  | 0.0440217  | 0.00829525 | 1.12E-07 | 0.09238904 | GTEEx - Esophagus Muscularis                |
| rs768283768        | Caffeine from Coffee | ENSG00000143457.6  | 1         | GOLP H3L    | 150644165      | rs1134067   | 1            | 150721175         | T     | G      | 0.39639  | 0.0131067  | 0.00235125 | 2.50E-08 | 0.788672  | 0.0455441 | 3.52E-67  | 0.0166187  | 0.00313194 | 1.12E-07 | 0.6084519  | GTEEx - Skin Sun Exposed Lower leg          |
| 7:73042302_GCTTT_G | Combined Caffeine    | ENSG00000009950.11 | 7         | MLXIP L     | 73023198       | rs13246993  | 7            | 73022746          | A     | G      | 0.142667 | 0.0347445  | 0.00345425 | 8.40E-24 | 0.506704  | 0.0815321 | 5.14E-10  | 0.0685696  | 0.0129695  | 1.24E-07 | 0.265909   | GTEEx - Esophagus Gastroesophageal Junction |
| rs768283768        | Caffeine from Coffee | ENSG00000143452.11 | 1         | HORMAD1     | 150681950      | rs11204717  | 1            | 150709129         | A     | T      | 0.394263 | 0.0127784  | 0.00234937 | 5.40E-08 | 1.10797   | 0.0508788 | 3.86E-105 | 0.0115332  | 0.00218557 | 1.31E-07 | 0.5859677  | GTEEx - Skin Sun Exposed Lower leg          |
| rs768283768        | Caffeine from Coffee | ENSG00000143452.11 | 1         | HORMAD1     | 150681950      | rs11204718  | 1            | 150709785         | G     | C      | 0.394263 | 0.0127732  | 0.00234939 | 5.40E-08 | 1.12726   | 0.0529239 | 1.14E-100 | 0.0113312  | 0.00215098 | 1.38E-07 | 0.6964135  | GTEEx - Esophagus Mucosa                    |
| rs768283768        | Combined Caffeine    | ENSG00000143452.11 | 1         | HORMAD1     | 150681950      | rs11583636  | 1            | 150694777         | G     | A      | 0.405    | 0.0227894  | 0.0023638  | 5.40E-22 | 0.732626  | 0.117162  | 4.02E-10  | 0.0311065  | 0.00592929 | 1.55E-07 | 0.07462922 | GTEEx - Cells EBV-transformed lymphocytes   |
| rs768283768        | Combined Caffeine    | ENSG00000143379.8  | 1         | SETDB1      | 150917976      | rs17658705  | 1            | 150678071         | T     | G      | 0.405    | 0.022792   | 0.00236378 | 5.30E-22 | -0.243504 | 0.038968  | 4.14E-10  | -0.0936001 | 0.0178493  | 1.57E-07 | 0.2054016  | GTEEx - Skin Not Sun Exposed Suprapubic     |
| rs2521501          | Caffeine from Coffee | ENSG00000182511.7  | 15        | FES         | 91432965       | rs7497304   | 15           | 91429176          | T     | G      | 0.343    | -0.0142403 | 0.00244464 | 5.70E-09 | -0.5141   | 0.0436416 | 4.95E-32  | 0.0276995  | 0.00530479 | 1.77E-07 | 0.5628922  | GTEEx - Thyroid                             |
| rs768283768        | Combined Caffeine    | ENSG00000143452.11 | 1         | HORMAD1     | 150681950      | rs17658705  | 1            | 150678071         | T     | G      | 0.405    | 0.022792   | 0.00236378 | 5.30E-22 | 0.580348  | 0.0935432 | 5.50E-10  | 0.039273   | 0.00752736 | 1.81E-07 | 0.2153355  | GTEEx - Esophagus Gastroesophageal Junction |
| rs17685            | Combined Caffeine    | ENSG00000227038.2  | 7         | AC005077.12 | 75728923       | rs1057868   | 7            | 75615006          | T     | C      | 0.305333 | 0.0403552  | 0.00256502 | 9.00E-56 | 0.290964  | 0.0530468 | 4.13E-08  | 0.138695   | 0.0267787  | 2.23E-07 | 0.8782062  | GTEEx - Testis                              |
| rs768283768        | Caffeine from Coffee | ENSG00000143457.6  | 1         | GOLP H3L    | 150644165      | rs1134067   | 1            | 150721175         | T     | G      | 0.39639  | 0.0131067  | 0.00235125 | 2.50E-08 | 0.621831  | 0.0458045 | 5.58E-42  | 0.0210776  | 0.00408752 | 2.52E-07 | 0.6080412  | GTEEx - Skin Not Sun Exposed Suprapubic     |
| rs768283768        | Caffeine from Coffee | ENSG00000143452.11 | 1         | HORMAD1     | 150681950      | rs7529194   | 1            | 150622620         | A     | T      | 0.394    | 0.0125987  | 0.00234883 | 8.10E-08 | 1.06836   | 0.0572195 | 8.48E-78  | 0.0117926  | 0.00228746 | 2.53E-07 | 0.5178539  | GTEEx - Skin Not Sun Exposed Suprapubic     |
| rs768283768        | Caffeine from Coffee | ENSG00000143452.11 | 1         | HORMAD1     | 150681950      | rs111842513 | 1            | 150712926         | A     | G      | 0.394263 | 0.0127876  | 0.00234956 | 5.30E-08 | 0.921119  | 0.0574382 | 7.08E-58  | 0.0138827  | 0.00269366 | 2.55E-07 | 0.6394203  | GTEEx - Adipose Subcutaneous                |
| rs768283768        | Caffeine from Coffee | ENSG00000143452.11 | 1         | HORMAD1     | 150681950      | rs72704603  | 1            | 150707992         | T     | C      | 0.394263 | 0.0128283  | 0.00234961 | 4.80E-08 | 0.950796  | 0.0623663 | 1.77E-52  | 0.0134922  | 0.00262489 | 2.75E-07 | 0.5119789  | GTEEx - Cells Transformed fibroblasts       |

eQTL gene mapping was performed using a SMR approach in data repositories from GTEx V7, GTEx brain, Brain-eMeta eQTL and blood eQTL (Westra and CAGE). eQTL genes were considered candidate causal genes if they passed the SMR test with Bonferroni-corrected P value  $<2.7 \times 10^{-7}$ , passed the HEIDI test with  $P > 0.05$ , and if the lead SNP of the eQTL gene was in LD ( $R^2 > 0.8$ ) with the queried caffeine intake SNPs. Abbreviations: SNP, single nucleotide polymorphism; CHR, chromosome; EFAL, effect allele; NEFAL, non-effect allele; EF Freq, effect allele frequency; SE, standard error; eQTL, expression quantitative trait locus; SMR, summary-data-based MR; HEIDI, Heterogeneity in Dependent Instruments test; GTEx, Genotype-Tissue Expression

**Table S20. SNPs and proxies for Mendelian Randomization analyses for combined caffeine intake on coronary artery disease**

| SNP         | CHR | BP        | ALLELE1 | ALLELE0 | A1FREQ   | BETA     | SE       | P value   | Proxy for           | R <sup>2</sup> |
|-------------|-----|-----------|---------|---------|----------|----------|----------|-----------|---------------------|----------------|
| rs7412396   | 1   | 150666797 | G       | A       | 0.597491 | -0.02279 | 0.002364 | 5.50E-22  | rs768283768         | 0.930744       |
| rs2987869   | 1   | 174789407 | G       | T       | 0.458638 | -0.01562 | 0.002332 | 2.10E-11  | 1:174856749_TG_T    | 0.998626       |
| rs1260326   | 2   | 27730940  | T       | C       | 0.391852 | -0.02297 | 0.002377 | 4.20E-22  |                     |                |
| rs78456557  | 3   | 123300686 | C       | G       | 0.900201 | -0.02364 | 0.00389  | 1.20E-09  |                     |                |
| rs114066728 | 3   | 142022265 | T       | C       | 0.870043 | -0.02127 | 0.003456 | 7.50E-10  | rs115454798         | 0.991139       |
| rs2231142   | 4   | 89052323  | G       | T       | 0.886707 | 0.03913  | 0.00366  | 1.10E-26  |                     |                |
| rs62332762  | 4   | 106143492 | C       | T       | 0.597585 | 0.01828  | 0.002368 | 1.20E-14  |                     |                |
| rs12514566  | 5   | 7391462   | G       | A       | 0.664698 | 0.017242 | 0.002456 | 2.20E-12  |                     |                |
| rs1872841   | 6   | 98576688  | C       | A       | 0.483724 | -0.01316 | 0.002328 | 1.60E-08  | rs754177720         | 0.902704       |
| rs9486902   | 6   | 108878052 | C       | T       | 0.837869 | 0.018849 | 0.00315  | 2.20E-09  | 6:108876096_CAAT_C  | 0.997488       |
| rs1490384   | 6   | 126851160 | C       | T       | 0.501467 | -0.01587 | 0.002323 | 8.30E-12  |                     |                |
| rs139797380 | 6   | 137244957 | C       | G       | 0.991601 | 0.106741 | 0.013575 | 3.70E-15  |                     |                |
| rs4410790   | 7   | 17284577  | T       | C       | 0.364122 | -0.08137 | 0.002412 | 1.50E-249 |                     |                |
| rs215601    | 7   | 32333921  | A       | C       | 0.372618 | 0.01488  | 0.002404 | 6.00E-10  |                     |                |
| rs34060476  | 7   | 73037956  | A       | G       | 0.865587 | -0.03535 | 0.003404 | 2.90E-25  | 7:73042302_GCTTT_G  | 0.99198        |
| rs17685     | 7   | 75616105  | G       | A       | 0.721471 | -0.0408  | 0.002584 | 3.80E-56  |                     |                |
| rs4240624   | 8   | 9184231   | G       | A       | 0.092461 | 0.02693  | 0.004012 | 1.90E-11  |                     |                |
| rs12785227  | 10  | 65262685  | A       | G       | 0.685798 | 0.014549 | 0.002507 | 6.50E-09  |                     |                |
| rs4418728   | 10  | 94839724  | G       | T       | 0.550788 | 0.014384 | 0.002333 | 7.00E-10  |                     |                |
| rs117810762 | 10  | 135315795 | G       | A       | 0.982023 | -0.06827 | 0.008863 | 1.30E-14  |                     |                |
| rs6265      | 11  | 27679916  | C       | T       | 0.810755 | 0.021572 | 0.002964 | 3.40E-13  |                     |                |
| rs1228024   | 11  | 47951353  | C       | A       | 0.340021 | 0.013965 | 0.002453 | 1.30E-08  |                     |                |
| rs7105462   | 11  | 112912048 | G       | A       | 0.40559  | 0.014163 | 0.002366 | 2.10E-09  |                     |                |
| rs595529    | 12  | 112000648 | A       | T       | 0.796265 | -0.01662 | 0.002882 | 8.10E-09  | rs376877108         | 0.993627       |
| rs12591786  | 15  | 60902512  | C       | T       | 0.842038 | 0.020213 | 0.00323  | 3.90E-10  |                     |                |
| rs2472297   | 15  | 75027880  | C       | T       | 0.731645 | -0.10487 | 0.002616 | 2.4E-351  |                     |                |
| rs2667773   | 15  | 77872191  | A       | G       | 0.686772 | 0.014947 | 0.002506 | 2.50E-09  |                     |                |
| rs59681738  | 16  | 18788186  | A       | G       | 0.618174 | 0.013733 | 0.002417 | 1.30E-08  | 16:18776851_G_GA    | 0.934833       |
| rs489693    | 18  | 57882787  | C       | A       | 0.67465  | -0.01759 | 0.002478 | 1.30E-12  |                     |                |
| rs56113850  | 19  | 41353107  | T       | C       | 0.421755 | -0.02649 | 0.002351 | 1.90E-29  |                     |                |
| rs138761767 | 19  | 47559089  | T       | C       | 0.25755  | -0.01627 | 0.002695 | 1.60E-09  | rs61141867          | 0.90578        |
| rs1291145   | 20  | 35528475  | T       | C       | 0.313259 | -0.01456 | 0.002506 | 6.30E-09  | 20:35568001_AAAAG_A | 0.998402       |
| rs6062679   | 20  | 62889991  | T       | C       | 0.534615 | -0.02278 | 0.002358 | 4.50E-22  |                     |                |
| rs190800998 | 22  | 24666292  | T       | C       | 0.985779 | 0.090577 | 0.009889 | 5.20E-20  | rs199612805         | 1              |
| rs9611527   | 22  | 41644428  | G       | A       | 0.664286 | 0.019792 | 0.002466 | 1.00E-15  |                     |                |

Sentinel single nucleotide polymorphisms (SNPs) and proxies used are provided for the Mendelian randomization analyses. In case a proxy was used, the original sentinel SNP is provided in the "Proxy for" column and the R<sup>2</sup> between them in the "R<sup>2</sup>" column. No proxy with R<sup>2</sup>>0.8 was available for 3:50895869\_ATAATAATAAT\_A and rs531431865, which were therefore excluded from analyses.

**Table S21. SNPs and proxies for Mendelian Randomization analyses for caffeine from coffee on coronary artery disease**

| SNP         | CHR | BP        | ALLELE1 | ALLELE0 | A1FREQ   | BETA     | SE       | P value   | Proxy for   | R <sup>2</sup> |
|-------------|-----|-----------|---------|---------|----------|----------|----------|-----------|-------------|----------------|
| rs4615895   | 1   | 96274668  | G       | A       | 0.259574 | -0.01705 | 0.002627 | 8.60E-11  |             |                |
| rs7412396   | 1   | 150666797 | G       | A       | 0.597371 | -0.01297 | 0.002337 | 2.90E-08  | rs768283768 | 0.930744       |
| rs7571957   | 2   | 646803    | T       | C       | 0.170688 | -0.02056 | 0.003047 | 1.50E-11  | rs7571970   | 0.99315        |
| rs11127048  | 2   | 27752463  | G       | A       | 0.381191 | -0.01997 | 0.002398 | 8.10E-17  |             |                |
| rs35198275  | 3   | 50536092  | A       | G       | 0.865693 | 0.020797 | 0.003387 | 8.20E-10  |             |                |
| rs2726513   | 4   | 106217358 | G       | T       | 0.587077 | 0.015301 | 0.002347 | 7.00E-11  |             |                |
| rs12514566  | 5   | 7391462   | G       | A       | 0.664625 | 0.014831 | 0.002428 | 1.00E-09  |             |                |
| rs6893807   | 5   | 87965021  | A       | G       | 0.843563 | -0.01916 | 0.003159 | 1.30E-09  |             |                |
| rs1327259   | 6   | 51177811  | A       | G       | 0.614152 | 0.015707 | 0.002365 | 3.10E-11  |             |                |
| rs4410790   | 7   | 17284577  | T       | C       | 0.364412 | -0.05171 | 0.002384 | 2.80E-104 |             |                |
| rs34060476  | 7   | 73037956  | A       | G       | 0.865581 | -0.02519 | 0.003365 | 7.10E-14  |             |                |
| rs1057868   | 7   | 75615006  | C       | T       | 0.714413 | -0.02445 | 0.002536 | 5.50E-22  |             |                |
| rs76881016  | 10  | 134196286 | A       | G       | 0.928496 | -0.02584 | 0.004453 | 6.60E-09  |             |                |
| rs117810762 | 10  | 135315795 | G       | A       | 0.982047 | -0.05011 | 0.008765 | 1.10E-08  |             |                |
| rs2298527   | 11  | 112851961 | G       | C       | 0.405568 | 0.014947 | 0.002336 | 1.60E-10  |             |                |
| rs2472297   | 15  | 75027880  | C       | T       | 0.731859 | -0.06521 | 0.002587 | 3.10E-140 |             |                |
| rs2521501   | 15  | 91437388  | A       | T       | 0.677316 | 0.014916 | 0.002472 | 1.60E-09  |             |                |
| rs28567725  | 16  | 53826028  | T       | C       | 0.5877   | -0.02172 | 0.002331 | 1.20E-20  | rs201399553 | 0.945928       |
| rs2350633   | 17  | 17587395  | A       | G       | 0.486877 | -0.01469 | 0.002296 | 1.60E-10  | rs139937261 | 0.997277       |
| rs66723169  | 18  | 57808978  | C       | A       | 0.769043 | -0.02249 | 0.002732 | 1.80E-16  |             |                |
| rs56113850  | 19  | 41353107  | T       | C       | 0.421821 | -0.02071 | 0.002323 | 4.90E-19  |             |                |
| rs6063085   | 20  | 45840459  | A       | C       | 0.625251 | -0.01571 | 0.00237  | 3.40E-11  |             |                |
| rs181251778 | 22  | 24901968  | A       | G       | 0.986146 | 0.072648 | 0.009834 | 1.50E-13  |             |                |

Sentinel single nucleotide polymorphisms (SNPs) and proxies used are provided for the Mendelian randomization analyses. In case a proxy was used, the original sentinel SNP is provided in the "Proxy for" column and the R<sup>2</sup> between them in the "R<sup>2</sup>" column. No proxy with R<sup>2</sup>>0.8 was available for rs1962201, which was therefore excluded from analyses.

**Table S22. SNPs and proxies for Mendelian Randomization analyses for caffeine from tea on coronary artery disease**

| SNP         | CHR | BP        | ALLELE1 | ALLELE0 | A1FREQ   | BETA     | SE       | P value   | Proxy for   | R <sup>2</sup> |
|-------------|-----|-----------|---------|---------|----------|----------|----------|-----------|-------------|----------------|
| rs9438624   | 1   | 26758044  | C       | T       | 0.19273  | -0.01535 | 0.002844 | 6.70E-08  | rs77476394  | 0.887444       |
| rs11204708  | 1   | 150682095 | C       | G       | 0.619872 | -0.01428 | 0.002349 | 1.20E-09  | rs11204711  | 0.998421       |
| rs56188862  | 1   | 174189269 | T       | C       | 0.614947 | 0.016829 | 0.002297 | 2.40E-13  |             |                |
| rs78020607  | 3   | 50254624  | A       | G       | 0.887096 | -0.01866 | 0.003527 | 1.20E-07  | rs145755097 | 0.869438       |
| rs2117137   | 3   | 89525505  | A       | G       | 0.594554 | -0.01349 | 0.002273 | 2.90E-09  |             |                |
| rs1481012   | 4   | 89039082  | A       | G       | 0.887297 | 0.026005 | 0.003536 | 1.90E-13  |             |                |
| rs192084998 | 5   | 152077481 | G       | A       | 0.703764 | 0.015836 | 0.002458 | 1.20E-10  |             |                |
| rs2465018   | 6   | 51241140  | G       | A       | 0.769413 | -0.02211 | 0.002666 | 1.10E-16  |             |                |
| rs139797380 | 6   | 137244957 | C       | G       | 0.991607 | 0.075145 | 0.013059 | 8.70E-09  |             |                |
| rs4410790   | 7   | 17284577  | T       | C       | 0.36537  | -0.04033 | 0.00232  | 1.10E-67  |             |                |
| rs6462899   | 7   | 39296489  | T       | A       | 0.375354 | -0.01259 | 0.002312 | 5.10E-08  | rs141180025 | 0.943469       |
| rs17685     | 7   | 75616105  | G       | A       | 0.721688 | -0.02391 | 0.002488 | 7.20E-22  |             |                |
| rs62534435  | 9   | 7042938   | C       | G       | 0.796528 | -0.01629 | 0.002776 | 4.40E-09  |             |                |
| rs11022752  | 11  | 13307622  | A       | G       | 0.730907 | -0.01535 | 0.002525 | 1.20E-09  |             |                |
| rs10741694  | 11  | 16286183  | T       | C       | 0.372823 | -0.01474 | 0.002312 | 1.80E-10  |             |                |
| rs73053413  | 12  | 11329548  | C       | T       | 0.836535 | 0.021681 | 0.003021 | 7.10E-13  |             |                |
| rs12591786  | 15  | 60902512  | C       | T       | 0.842256 | 0.019576 | 0.003109 | 3.00E-10  |             |                |
| rs2472297   | 15  | 75027880  | C       | T       | 0.732806 | -0.05411 | 0.002521 | 3.30E-102 |             |                |
| rs28429148  | 16  | 53798319  | G       | A       | 0.565413 | 0.013189 | 0.002288 | 8.20E-09  |             |                |
| rs153328    | 16  | 63025865  | C       | G       | 0.782673 | -0.01445 | 0.002718 | 1.10E-07  | rs199602679 | 0.976937       |
| rs140775622 | 20  | 62962869  | C       | T       | 0.830545 | -0.02262 | 0.003207 | 1.80E-12  |             |                |
| rs4817505   | 21  | 34343828  | T       | C       | 0.607874 | -0.01512 | 0.002292 | 4.20E-11  |             |                |
| rs9624470   | 22  | 24820268  | G       | A       | 0.419254 | -0.02534 | 0.002272 | 6.80E-29  |             |                |
| rs132919    | 22  | 41809903  | G       | C       | 0.22639  | -0.01708 | 0.002697 | 2.40E-10  |             |                |

Sentinel single nucleotide polymorphisms (SNPs) and proxies used are provided for the Mendelian randomization analyses. In case a proxy was used, the original sentinel SNP is provided in the "Proxy for" column and the R<sup>2</sup> between them in the "R<sup>2</sup>" column.

**Table S23. F-statistics of all instruments for the Mendelian Randomization analyses between caffeine intake and CAD or T2D**

| GWAS trait               | SNP         | CHR | hg19      | EFAL | NEFAL | EF Freq  | BETA     | SE       | R <sup>2</sup> | N      | F Statistic | P STATA   | P GWAS    | MR  |
|--------------------------|-------------|-----|-----------|------|-------|----------|----------|----------|----------------|--------|-------------|-----------|-----------|-----|
| Combined caffeine intake | rs7412396   | 1   | 150666797 | G    | A     | 0.597491 | -0.02279 | 0.002364 | 0.014067       | 362316 | 5169.384    | 1.73E-21  | 5.50E-22  | CAD |
| Combined caffeine intake | rs2987869   | 1   | 174789407 | G    | T     | 0.458638 | -0.01562 | 0.002332 | 0.013936       | 362316 | 5120.384    | 3.91E-11  | 2.10E-11  | CAD |
| Combined caffeine intake | rs1260326   | 2   | 27730940  | T    | C     | 0.391852 | -0.02297 | 0.002377 | 0.014068       | 362316 | 5169.591    | 8.45E-22  | 4.20E-22  | CAD |
| Combined caffeine intake | rs78456557  | 3   | 123300686 | C    | G     | 0.900201 | -0.02364 | 0.00389  | 0.013912       | 362316 | 5111.729    | 3.18E-09  | 1.20E-09  | CAD |
| Combined caffeine intake | rs114066728 | 3   | 142022265 | T    | C     | 0.870043 | -0.02127 | 0.003456 | 0.013924       | 362316 | 5115.983    | 4.60E-10  | 7.50E-10  | CAD |
| Combined caffeine intake | rs2231142   | 4   | 89052323  | G    | T     | 0.886707 | 0.03913  | 0.00366  | 0.014118       | 362316 | 5188.382    | 4.78E-26  | 1.10E-26  | CAD |
| Combined caffeine intake | rs62332762  | 4   | 106143492 | C    | T     | 0.597585 | 0.01828  | 0.002368 | 0.013985       | 362316 | 5138.959    | 6.20E-15  | 1.20E-14  | CAD |
| Combined caffeine intake | rs12514566  | 5   | 7391462   | G    | A     | 0.664698 | 0.017242 | 0.002456 | 0.013963       | 362316 | 5130.563    | 2.59E-13  | 2.20E-12  | CAD |
| Combined caffeine intake | rs1872841   | 6   | 98576688  | C    | A     | 0.483724 | -0.01316 | 0.002328 | 0.013899       | 362316 | 5106.653    | 4.52E-08  | 1.60E-08  | CAD |
| Combined caffeine intake | rs9486902   | 6   | 108878052 | C    | T     | 0.837869 | 0.018849 | 0.00315  | 0.013912       | 362316 | 5111.45     | 4.20E-09  | 2.20E-09  | CAD |
| Combined caffeine intake | rs1490384   | 6   | 126851160 | C    | T     | 0.501467 | -0.01587 | 0.002323 | 0.013936       | 362316 | 5120.626    | 3.76E-11  | 8.30E-12  | CAD |
| Combined caffeine intake | rs139797380 | 6   | 137244957 | C    | G     | 0.991601 | 0.106741 | 0.013575 | 0.013989       | 362316 | 5140.392    | 5.51E-16  | 3.70E-15  | CAD |
| Combined caffeine intake | rs4410790   | 7   | 17284577  | T    | C     | 0.364122 | -0.08137 | 0.002412 | 0.016873       | 362316 | 6218.187    | 4.90E-248 | 1.50E-249 | CAD |
| Combined caffeine intake | rs215601    | 7   | 32333921  | A    | C     | 0.372618 | 0.01488  | 0.002404 | 0.013919       | 362316 | 5114.316    | 9.96E-10  | 6.00E-10  | CAD |
| Combined caffeine intake | rs34060476  | 7   | 73037956  | A    | G     | 0.865587 | -0.03535 | 0.003404 | 0.014101       | 362316 | 5182.065    | 7.21E-24  | 2.90E-25  | CAD |
| Combined caffeine intake | rs17685     | 7   | 75616105  | G    | A     | 0.721471 | -0.0408  | 0.002584 | 0.014481       | 362316 | 5323.936    | 2.32E-54  | 3.80E-56  | CAD |
| Combined caffeine intake | rs4240624   | 8   | 9184231   | G    | A     | 0.092461 | 0.02693  | 0.004012 | 0.01394        | 362316 | 5122.161    | 2.03E-11  | 1.90E-11  | CAD |
| Combined caffeine intake | rs12785227  | 10  | 65262685  | A    | G     | 0.685798 | 0.014549 | 0.002507 | 0.0139         | 362316 | 5107.326    | 3.26E-08  | 6.50E-09  | CAD |
| Combined caffeine intake | rs4418728   | 10  | 94839724  | G    | T     | 0.550788 | 0.014384 | 0.002333 | 0.013924       | 362316 | 5116.012    | 3.88E-10  | 7.00E-10  | CAD |
| Combined caffeine intake | rs117810762 | 10  | 135315795 | G    | A     | 0.982023 | -0.06827 | 0.008863 | 0.013972       | 362316 | 5134.15     | 4.37E-14  | 1.30E-14  | CAD |
| Combined caffeine intake | rs6265      | 11  | 27679916  | C    | T     | 0.810755 | 0.021572 | 0.002964 | 0.013957       | 362316 | 5128.536    | 7.83E-13  | 3.40E-13  | CAD |
| Combined caffeine intake | rs1228024   | 11  | 47951353  | C    | A     | 0.340021 | 0.013965 | 0.002453 | 0.013901       | 362316 | 5107.388    | 3.28E-08  | 1.30E-08  | CAD |
| Combined caffeine intake | rs7105462   | 11  | 112912048 | G    | A     | 0.40559  | 0.014163 | 0.002366 | 0.013919       | 362316 | 5114.38     | 9.50E-10  | 2.10E-09  | CAD |
| Combined caffeine intake | rs595529    | 12  | 112000648 | A    | T     | 0.796265 | -0.01662 | 0.002882 | 0.013909       | 362316 | 5110.631    | 5.94E-09  | 8.10E-09  | CAD |
| Combined caffeine intake | rs12591786  | 15  | 60902512  | C    | T     | 0.842038 | 0.020213 | 0.00323  | 0.013914       | 362316 | 5112.39     | 2.27E-09  | 3.90E-10  | CAD |
| Combined caffeine intake | rs2472297   | 15  | 75027880  | C    | T     | 0.731645 | -0.10487 | 0.002616 | 0.01816        | 362316 | 6701.501    | 0         | 2.4E-351  | CAD |
| Combined caffeine intake | rs2667773   | 15  | 77872191  | A    | G     | 0.686772 | 0.014947 | 0.002506 | 0.013912       | 362316 | 5111.556    | 3.88E-09  | 2.50E-09  | CAD |
| Combined caffeine intake | rs59681738  | 16  | 18788186  | A    | G     | 0.618174 | 0.013733 | 0.002417 | 0.013904       | 362316 | 5108.777    | 1.57E-08  | 1.30E-08  | CAD |
| Combined caffeine intake | rs489693    | 18  | 57882787  | C    | A     | 0.67465  | -0.01759 | 0.002478 | 0.013947       | 362316 | 5124.483    | 6.86E-12  | 1.30E-12  | CAD |
| Combined caffeine intake | rs56113850  | 19  | 41353107  | T    | C     | 0.421755 | -0.02649 | 0.002351 | 0.01416        | 362316 | 5203.96     | 3.48E-29  | 1.90E-29  | CAD |
| Combined caffeine intake | rs138761767 | 19  | 47559089  | T    | C     | 0.25755  | -0.01627 | 0.002695 | 0.013915       | 362316 | 5112.586    | 2.17E-09  | 1.60E-09  | CAD |
| Combined caffeine intake | rs1291145   | 20  | 35528475  | T    | C     | 0.313259 | -0.01456 | 0.002506 | 0.013905       | 362316 | 5108.846    | 1.53E-08  | 6.30E-09  | CAD |
| Combined caffeine intake | rs6062679   | 20  | 62889991  | T    | C     | 0.534615 | -0.02278 | 0.002358 | 0.014074       | 362316 | 5172.107    | 3.00E-22  | 4.50E-22  | CAD |
| Combined caffeine intake | rs190800998 | 22  | 24666292  | T    | C     | 0.985779 | 0.090577 | 0.009889 | 0.014057       | 362316 | 5165.523    | 3.22E-20  | 5.20E-20  | CAD |
| Combined caffeine intake | rs9611527   | 22  | 41644428  | G    | A     | 0.664286 | 0.019792 | 0.002466 | 0.013997       | 362316 | 5143.193    | 6.20E-16  | 1.00E-15  | CAD |
| Combined caffeine intake | rs7412396   | 1   | 150666797 | G    | A     | 0.597491 | -0.02279 | 0.002364 | 0.014067       | 362316 | 5169.384    | 1.73E-21  | 5.50E-22  | T2D |
| Combined caffeine intake | rs2987869   | 1   | 174789407 | G    | T     | 0.458638 | -0.01562 | 0.002332 | 0.013936       | 362316 | 5120.384    | 3.91E-11  | 2.10E-11  | T2D |
| Combined caffeine intake | rs1260326   | 2   | 27730940  | T    | C     | 0.391852 | -0.02297 | 0.002377 | 0.014068       | 362316 | 5169.591    | 8.45E-22  | 4.20E-22  | T2D |
| Combined caffeine intake | rs78456557  | 3   | 123300686 | C    | G     | 0.900201 | -0.02364 | 0.00389  | 0.013912       | 362316 | 5111.729    | 3.18E-09  | 1.20E-09  | T2D |
| Combined caffeine intake | rs114066728 | 3   | 142022265 | T    | C     | 0.870043 | -0.02127 | 0.003456 | 0.013924       | 362316 | 5115.983    | 4.60E-10  | 7.50E-10  | T2D |
| Combined caffeine intake | rs2231142   | 4   | 89052323  | G    | T     | 0.886707 | 0.03913  | 0.00366  | 0.014118       | 362316 | 5188.382    | 4.78E-26  | 1.10E-26  | T2D |
| Combined caffeine intake | rs62332762  | 4   | 106143492 | C    | T     | 0.597585 | 0.01828  | 0.002368 | 0.013985       | 362316 | 5138.959    | 6.20E-15  | 1.20E-14  | T2D |
| Combined caffeine intake | rs12514566  | 5   | 7391462   | G    | A     | 0.664698 | 0.017242 | 0.002456 | 0.013963       | 362316 | 5130.563    | 2.59E-13  | 2.20E-12  | T2D |
| Combined caffeine intake | rs1872841   | 6   | 98576688  | C    | A     | 0.483724 | -0.01316 | 0.002328 | 0.013899       | 362316 | 5106.653    | 4.52E-08  | 1.60E-08  | T2D |

| GWAS trait               | SNP         | CHR | hg19      | EFAL | NEFAL | EF Freq  | BETA     | SE       | R <sup>2</sup> | N      | F Statistic | P STATA   | P GWAS    | MR  |
|--------------------------|-------------|-----|-----------|------|-------|----------|----------|----------|----------------|--------|-------------|-----------|-----------|-----|
| Combined caffeine intake | rs9486902   | 6   | 108878052 | C    | T     | 0.837869 | 0.018849 | 0.00315  | 0.013912       | 362316 | 5111.45     | 4.20E-09  | 2.20E-09  | T2D |
| Combined caffeine intake | rs1490384   | 6   | 126851160 | C    | T     | 0.501467 | -0.01587 | 0.002323 | 0.013936       | 362316 | 5120.626    | 3.76E-11  | 8.30E-12  | T2D |
| Combined caffeine intake | rs139797380 | 6   | 137244957 | C    | G     | 0.991601 | 0.106741 | 0.013575 | 0.013989       | 362316 | 5140.392    | 5.51E-16  | 3.70E-15  | T2D |
| Combined caffeine intake | rs4410790   | 7   | 17284577  | T    | C     | 0.364122 | -0.08137 | 0.002412 | 0.016873       | 362316 | 6218.187    | 4.90E-248 | 1.50E-249 | T2D |
| Combined caffeine intake | rs215601    | 7   | 32333921  | A    | C     | 0.372618 | 0.01488  | 0.002404 | 0.013919       | 362316 | 5114.316    | 9.96E-10  | 6.00E-10  | T2D |
| Combined caffeine intake | rs34060476  | 7   | 73037956  | A    | G     | 0.865587 | -0.03535 | 0.003404 | 0.014101       | 362316 | 5182.065    | 7.21E-24  | 2.90E-25  | T2D |
| Combined caffeine intake | rs17685     | 7   | 75616105  | G    | A     | 0.721471 | -0.0408  | 0.002584 | 0.014481       | 362316 | 5323.936    | 2.32E-54  | 3.80E-56  | T2D |
| Combined caffeine intake | rs4240624   | 8   | 9184231   | G    | A     | 0.092461 | 0.02693  | 0.004012 | 0.01394        | 362316 | 5122.161    | 2.03E-11  | 1.90E-11  | T2D |
| Combined caffeine intake | rs12785227  | 10  | 65262685  | A    | G     | 0.685798 | 0.014549 | 0.002507 | 0.0139         | 362316 | 5107.326    | 3.26E-08  | 6.50E-09  | T2D |
| Combined caffeine intake | rs4418728   | 10  | 94839724  | G    | T     | 0.550788 | 0.014384 | 0.002333 | 0.013924       | 362316 | 5116.012    | 3.88E-10  | 7.00E-10  | T2D |
| Combined caffeine intake | rs117810762 | 10  | 135315795 | G    | A     | 0.982023 | -0.06827 | 0.008863 | 0.013972       | 362316 | 5134.15     | 4.37E-14  | 1.30E-14  | T2D |
| Combined caffeine intake | rs6265      | 11  | 27679916  | C    | T     | 0.810755 | 0.021572 | 0.002964 | 0.013957       | 362316 | 5128.536    | 7.83E-13  | 3.40E-13  | T2D |
| Combined caffeine intake | rs1228024   | 11  | 47951353  | C    | A     | 0.340021 | 0.013965 | 0.002453 | 0.013901       | 362316 | 5107.388    | 3.28E-08  | 1.30E-08  | T2D |
| Combined caffeine intake | rs7105462   | 11  | 112912048 | G    | A     | 0.40559  | 0.014163 | 0.002366 | 0.013919       | 362316 | 5114.38     | 9.50E-10  | 2.10E-09  | T2D |
| Combined caffeine intake | rs607316    | 12  | 111969448 | C    | T     | 0.795666 | -0.01678 | 0.002878 | 0.013911       | 362316 | 5111.429    | 3.96E-09  | 5.50E-09  | T2D |
| Combined caffeine intake | rs12591786  | 15  | 60902512  | C    | T     | 0.842038 | 0.020213 | 0.00323  | 0.013914       | 362316 | 5112.39     | 2.27E-09  | 3.90E-10  | T2D |
| Combined caffeine intake | rs2472297   | 15  | 75027880  | C    | T     | 0.731645 | -0.10487 | 0.002616 | 0.01816        | 362316 | 6701.501    | 0         | 2.4E-351  | T2D |
| Combined caffeine intake | rs2667773   | 15  | 77872191  | A    | G     | 0.686772 | 0.014947 | 0.002506 | 0.013912       | 362316 | 5111.556    | 3.88E-09  | 2.50E-09  | T2D |
| Combined caffeine intake | rs3965574   | 16  | 18789966  | A    | G     | 0.61805  | 0.013716 | 0.002416 | 0.013904       | 362316 | 5108.739    | 1.60E-08  | 1.40E-08  | T2D |
| Combined caffeine intake | rs489693    | 18  | 57882787  | C    | A     | 0.67465  | -0.01759 | 0.002478 | 0.013947       | 362316 | 5124.483    | 6.86E-12  | 1.30E-12  | T2D |
| Combined caffeine intake | rs56113850  | 19  | 41353107  | T    | C     | 0.421755 | -0.02649 | 0.002351 | 0.01416        | 362316 | 5203.96     | 3.48E-29  | 1.90E-29  | T2D |
| Combined caffeine intake | rs61599759  | 19  | 47557472  | A    | G     | 0.245811 | -0.01741 | 0.002732 | 0.013926       | 362316 | 5116.85     | 2.45E-10  | 1.80E-10  | T2D |
| Combined caffeine intake | rs1291145   | 20  | 35528475  | T    | C     | 0.313259 | -0.01456 | 0.002506 | 0.013905       | 362316 | 5108.846    | 1.53E-08  | 6.30E-09  | T2D |
| Combined caffeine intake | rs6062679   | 20  | 62889991  | T    | C     | 0.534615 | -0.02278 | 0.002358 | 0.014074       | 362316 | 5172.107    | 3.00E-22  | 4.50E-22  | T2D |
| Combined caffeine intake | rs138019862 | 22  | 24821154  | G    | T     | 0.986106 | 0.093407 | 0.009925 | 0.014071       | 362316 | 5171.046    | 2.18E-21  | 4.90E-21  | T2D |
| Combined caffeine intake | rs9611527   | 22  | 41644428  | G    | A     | 0.664286 | 0.019792 | 0.002466 | 0.013997       | 362316 | 5143.193    | 6.20E-16  | 1.00E-15  | T2D |
| Caffeine from coffee     | rs4615895   | 1   | 96274668  | G    | A     | 0.259574 | -0.01705 | 0.002627 | 0.011992       | 373522 | 4533.705    | 1.92E-10  | 8.60E-11  | CAD |
| Caffeine from coffee     | rs7412396   | 1   | 150666797 | G    | A     | 0.597371 | -0.01297 | 0.002337 | 0.01197        | 373522 | 4525.166    | 1.35E-08  | 2.90E-08  | CAD |
| Caffeine from coffee     | rs7571957   | 2   | 646803    | T    | C     | 0.170688 | -0.02056 | 0.003047 | 0.01201        | 373522 | 4540.678    | 4.81E-12  | 1.50E-11  | CAD |
| Caffeine from coffee     | rs11127048  | 2   | 27752463  | G    | A     | 0.381191 | -0.01997 | 0.002398 | 0.012081       | 373522 | 4567.802    | 6.74E-18  | 8.10E-17  | CAD |
| Caffeine from coffee     | rs35198275  | 3   | 50536092  | A    | G     | 0.865693 | 0.020797 | 0.003387 | 0.011987       | 373522 | 4531.599    | 4.48E-10  | 8.20E-10  | CAD |
| Caffeine from coffee     | rs2726513   | 4   | 106217358 | G    | T     | 0.587077 | 0.015301 | 0.002347 | 0.011987       | 373522 | 4531.666    | 5.18E-10  | 7.00E-11  | CAD |
| Caffeine from coffee     | rs12514566  | 5   | 7391462   | G    | A     | 0.664625 | 0.014831 | 0.002428 | 0.011991       | 373522 | 4533.052    | 2.31E-10  | 1.00E-09  | CAD |
| Caffeine from coffee     | rs6893807   | 5   | 87965021  | A    | G     | 0.843563 | -0.01916 | 0.003159 | 0.011983       | 373522 | 4530.283    | 9.38E-10  | 1.30E-09  | CAD |
| Caffeine from coffee     | rs1327259   | 6   | 51177811  | A    | G     | 0.614152 | 0.015707 | 0.002365 | 0.011995       | 373522 | 4534.635    | 1.14E-10  | 3.10E-11  | CAD |
| Caffeine from coffee     | rs4410790   | 7   | 17284577  | T    | C     | 0.364412 | -0.05171 | 0.002384 | 0.013193       | 373522 | 4993.793    | 6.01E-110 | 2.80E-104 | CAD |
| Caffeine from coffee     | rs34060476  | 7   | 73037956  | A    | G     | 0.865581 | -0.02519 | 0.003365 | 0.012032       | 373522 | 4549.021    | 1.47E-13  | 7.10E-14  | CAD |
| Caffeine from coffee     | rs1057868   | 7   | 75615006  | C    | T     | 0.714413 | -0.02445 | 0.002536 | 0.012128       | 373522 | 4585.517    | 9.77E-22  | 5.50E-22  | CAD |
| Caffeine from coffee     | rs76881016  | 10  | 134196286 | A    | G     | 0.928496 | -0.02584 | 0.004453 | 0.011957       | 373522 | 4520.214    | 1.39E-07  | 6.60E-09  | CAD |
| Caffeine from coffee     | rs117810762 | 10  | 135315795 | G    | A     | 0.982047 | -0.05011 | 0.008765 | 0.011989       | 373522 | 4532.505    | 3.50E-10  | 1.10E-08  | CAD |
| Caffeine from coffee     | rs2298527   | 11  | 112851961 | G    | C     | 0.405568 | 0.014947 | 0.002336 | 0.011978       | 373522 | 4528.319    | 2.77E-09  | 1.60E-10  | CAD |
| Caffeine from coffee     | rs2472297   | 15  | 75027880  | C    | T     | 0.731859 | -0.06521 | 0.002587 | 0.013586       | 373522 | 5144.517    | 1.83E-138 | 3.10E-140 | CAD |
| Caffeine from coffee     | rs2521501   | 15  | 91437388  | A    | T     | 0.677316 | 0.014916 | 0.002472 | 0.011971       | 373522 | 4525.774    | 1.02E-08  | 1.60E-09  | CAD |
| Caffeine from coffee     | rs28567725  | 16  | 53826028  | T    | C     | 0.5877   | -0.02172 | 0.002331 | 0.012113       | 373522 | 4579.932    | 1.89E-20  | 1.20E-20  | CAD |
| Caffeine from coffee     | rs2350633   | 17  | 17587395  | A    | G     | 0.486877 | -0.01469 | 0.002296 | 0.012003       | 373522 | 4537.946    | 1.77E-11  | 1.60E-10  | CAD |

| GWAS trait           | SNP         | CHR | hg19      | EFAL | NEFAL | EF Freq  | BETA     | SE       | R <sup>2</sup> | N      | F Statistic | P STATA   | P GWAS    | MR  |
|----------------------|-------------|-----|-----------|------|-------|----------|----------|----------|----------------|--------|-------------|-----------|-----------|-----|
| Caffeine from coffee | rs66723169  | 18  | 57808978  | C    | A     | 0.769043 | -0.02249 | 0.002732 | 0.012045       | 373522 | 4553.886    | 1.26E-14  | 1.80E-16  | CAD |
| Caffeine from coffee | rs56113850  | 19  | 41353107  | T    | C     | 0.421821 | -0.02071 | 0.002323 | 0.012076       | 373522 | 4565.758    | 1.95E-17  | 4.90E-19  | CAD |
| Caffeine from coffee | rs6063085   | 20  | 45840459  | A    | C     | 0.625251 | -0.01571 | 0.00237  | 0.011992       | 373522 | 4533.476    | 1.88E-10  | 3.40E-11  | CAD |
| Caffeine from coffee | rs181251778 | 22  | 24901968  | A    | G     | 0.986146 | 0.072648 | 0.009834 | 0.012039       | 373522 | 4551.664    | 1.53E-14  | 1.50E-13  | CAD |
| Caffeine from coffee | rs4615895   | 1   | 96274668  | G    | A     | 0.259574 | -0.01705 | 0.002627 | 0.011992       | 373522 | 4533.705    | 1.92E-10  | 8.60E-11  | T2D |
| Caffeine from coffee | rs7412396   | 1   | 150666797 | G    | A     | 0.597371 | -0.01297 | 0.002337 | 0.01197        | 373522 | 4525.166    | 1.35E-08  | 2.90E-08  | T2D |
| Caffeine from coffee | rs7561317   | 2   | 644953    | A    | G     | 0.171158 | -0.02037 | 0.003043 | 0.01201        | 373522 | 4540.321    | 5.84E-12  | 2.20E-11  | T2D |
| Caffeine from coffee | rs11127048  | 2   | 27752463  | G    | A     | 0.381191 | -0.01997 | 0.002398 | 0.012081       | 373522 | 4567.802    | 6.74E-18  | 8.10E-17  | T2D |
| Caffeine from coffee | rs35198275  | 3   | 50536092  | A    | G     | 0.865693 | 0.020797 | 0.003387 | 0.011987       | 373522 | 4531.599    | 4.48E-10  | 8.20E-10  | T2D |
| Caffeine from coffee | rs2726513   | 4   | 106217358 | G    | T     | 0.587077 | 0.015301 | 0.002347 | 0.011987       | 373522 | 4531.666    | 5.18E-10  | 7.00E-11  | T2D |
| Caffeine from coffee | rs12514566  | 5   | 7391462   | G    | A     | 0.664625 | 0.014831 | 0.002428 | 0.011991       | 373522 | 4533.052    | 2.31E-10  | 1.00E-09  | T2D |
| Caffeine from coffee | rs6893807   | 5   | 87965021  | A    | G     | 0.843563 | -0.01916 | 0.003159 | 0.011983       | 373522 | 4530.283    | 9.38E-10  | 1.30E-09  | T2D |
| Caffeine from coffee | rs1327259   | 6   | 51177811  | A    | G     | 0.614152 | 0.015707 | 0.002365 | 0.011995       | 373522 | 4534.635    | 1.14E-10  | 3.10E-11  | T2D |
| Caffeine from coffee | rs4410790   | 7   | 17284577  | T    | C     | 0.364412 | -0.05171 | 0.002384 | 0.013193       | 373522 | 4993.793    | 6.01E-110 | 2.80E-104 | T2D |
| Caffeine from coffee | rs34060476  | 7   | 73037956  | A    | G     | 0.865581 | -0.02519 | 0.003365 | 0.012032       | 373522 | 4549.021    | 1.47E-13  | 7.10E-14  | T2D |
| Caffeine from coffee | rs1057868   | 7   | 75615006  | C    | T     | 0.714413 | -0.02445 | 0.002536 | 0.012128       | 373522 | 4585.517    | 9.77E-22  | 5.50E-22  | T2D |
| Caffeine from coffee | rs76881016  | 10  | 134196286 | A    | G     | 0.928496 | -0.02584 | 0.004453 | 0.011957       | 373522 | 4520.214    | 1.39E-07  | 6.60E-09  | T2D |
| Caffeine from coffee | rs117810762 | 10  | 135315795 | G    | A     | 0.982047 | -0.05011 | 0.008765 | 0.011989       | 373522 | 4532.505    | 3.50E-10  | 1.10E-08  | T2D |
| Caffeine from coffee | rs2298527   | 11  | 112851961 | G    | C     | 0.405568 | 0.014947 | 0.002336 | 0.011978       | 373522 | 4528.319    | 2.77E-09  | 1.60E-10  | T2D |
| Caffeine from coffee | rs2472297   | 15  | 75027880  | C    | T     | 0.731859 | -0.06521 | 0.002587 | 0.013586       | 373522 | 5144.517    | 1.83E-138 | 3.10E-140 | T2D |
| Caffeine from coffee | rs2521501   | 15  | 91437388  | A    | T     | 0.677316 | 0.014916 | 0.002472 | 0.011971       | 373522 | 4525.774    | 1.02E-08  | 1.60E-09  | T2D |
| Caffeine from coffee | rs28567725  | 16  | 53826028  | T    | C     | 0.5877   | -0.02172 | 0.002331 | 0.012113       | 373522 | 4579.932    | 1.89E-20  | 1.20E-20  | T2D |
| Caffeine from coffee | rs2350633   | 17  | 17587395  | A    | G     | 0.486877 | -0.01469 | 0.002296 | 0.012003       | 373522 | 4537.946    | 1.77E-11  | 1.60E-10  | T2D |
| Caffeine from coffee | rs66723169  | 18  | 57808978  | C    | A     | 0.769043 | -0.02249 | 0.002732 | 0.012045       | 373522 | 4553.886    | 1.26E-14  | 1.80E-16  | T2D |
| Caffeine from coffee | rs56113850  | 19  | 41353107  | T    | C     | 0.421821 | -0.02071 | 0.002323 | 0.012076       | 373522 | 4565.758    | 1.95E-17  | 4.90E-19  | T2D |
| Caffeine from coffee | rs6063085   | 20  | 45840459  | A    | C     | 0.625251 | -0.01571 | 0.00237  | 0.011992       | 373522 | 4533.476    | 1.88E-10  | 3.40E-11  | T2D |
| Caffeine from coffee | rs181251778 | 22  | 24901968  | A    | G     | 0.986146 | 0.072648 | 0.009834 | 0.012039       | 373522 | 4551.664    | 1.53E-14  | 1.50E-13  | T2D |
| Caffeine from tea    | rs9438624   | 1   | 26758044  | C    | T     | 0.19273  | -0.01535 | 0.002844 | 0.011885       | 373522 | 4492.773    | 4.63E-01  | 6.70E-08  | CAD |
| Caffeine from tea    | rs11204708  | 1   | 150682095 | C    | G     | 0.619872 | -0.01428 | 0.002349 | 0.011959       | 373522 | 4521.126    | 1.04E-07  | 1.20E-09  | CAD |
| Caffeine from tea    | rs56188862  | 1   | 174189269 | T    | C     | 0.614947 | 0.016829 | 0.002297 | 0.011884       | 373522 | 4492.339    | 7.38E-01  | 2.40E-13  | CAD |
| Caffeine from tea    | rs78020607  | 3   | 50254624  | A    | G     | 0.887096 | -0.01866 | 0.003527 | 0.011906       | 373522 | 4500.895    | 3.64E-03  | 1.20E-07  | CAD |
| Caffeine from tea    | rs2117137   | 3   | 89525505  | A    | G     | 0.594554 | -0.01349 | 0.002273 | 0.011896       | 373522 | 4497.011    | 2.98E-02  | 2.90E-09  | CAD |
| Caffeine from tea    | rs1481012   | 4   | 89039082  | A    | G     | 0.887297 | 0.026005 | 0.003536 | 0.011945       | 373522 | 4515.799    | 1.13E-06  | 1.90E-13  | CAD |
| Caffeine from tea    | rs192084998 | 5   | 152077481 | G    | A     | 0.703764 | 0.015836 | 0.002458 | 0.011885       | 373522 | 4492.581    | 5.55E-01  | 1.20E-10  | CAD |
| Caffeine from tea    | rs2465018   | 6   | 51241140  | G    | A     | 0.769413 | -0.02211 | 0.002666 | 0.011975       | 373522 | 4527.092    | 4.55E-09  | 1.10E-16  | CAD |
| Caffeine from tea    | rs139797380 | 6   | 137244957 | C    | G     | 0.991607 | 0.075145 | 0.013059 | 0.011926       | 373522 | 4508.398    | 4.72E-05  | 8.70E-09  | CAD |
| Caffeine from tea    | rs4410790   | 7   | 17284577  | T    | C     | 0.36537  | -0.04033 | 0.00232  | 0.013193       | 373522 | 4993.793    | 6.01E-110 | 1.10E-67  | CAD |
| Caffeine from tea    | rs6462899   | 7   | 39296489  | T    | A     | 0.375354 | -0.01259 | 0.002312 | 0.011893       | 373522 | 4495.738    | 6.31E-02  | 5.10E-08  | CAD |
| Caffeine from tea    | rs17685     | 7   | 75616105  | G    | A     | 0.721688 | -0.02391 | 0.002488 | 0.012123       | 373522 | 4583.926    | 2.17E-21  | 7.20E-22  | CAD |
| Caffeine from tea    | rs62534435  | 9   | 7042938   | C    | G     | 0.796528 | -0.01629 | 0.002776 | 0.011885       | 373522 | 4492.788    | 4.57E-01  | 4.40E-09  | CAD |
| Caffeine from tea    | rs11022752  | 11  | 13307622  | A    | G     | 0.730907 | -0.01535 | 0.002525 | 0.011888       | 373522 | 4493.73     | 2.24E-01  | 1.20E-09  | CAD |
| Caffeine from tea    | rs10741694  | 11  | 16286183  | T    | C     | 0.372823 | -0.01474 | 0.002312 | 0.011885       | 373522 | 4492.73     | 4.82E-01  | 1.80E-10  | CAD |
| Caffeine from tea    | rs73053413  | 12  | 11329548  | C    | T     | 0.836535 | 0.021681 | 0.003021 | 0.011946       | 373522 | 4516.148    | 1.15E-06  | 7.10E-13  | CAD |
| Caffeine from tea    | rs12591786  | 15  | 60902512  | C    | T     | 0.842256 | 0.019576 | 0.003109 | 0.011894       | 373522 | 4495.968    | 5.41E-02  | 3.00E-10  | CAD |
| Caffeine from tea    | rs2472297   | 15  | 75027880  | C    | T     | 0.732806 | -0.05411 | 0.002521 | 0.013586       | 373522 | 5144.517    | 1.83E-138 | 3.30E-102 | CAD |



| GWAS trait        | SNP         | CHR | hg19      | EFAL | NEFAL | EF Freq  | BETA     | SE       | R <sup>2</sup> | N      | F Statistic | P STATA   | P GWAS    | MR  |
|-------------------|-------------|-----|-----------|------|-------|----------|----------|----------|----------------|--------|-------------|-----------|-----------|-----|
| Caffeine from tea | rs28429148  | 16  | 53798319  | G    | A     | 0.565413 | 0.013189 | 0.002288 | 0.012094       | 373522 | 4572.593    | 6.52E-19  | 8.20E-09  | CAD |
| Caffeine from tea | rs153328    | 16  | 63025865  | C    | G     | 0.782673 | -0.01445 | 0.002718 | 0.011884       | 373522 | 4492.32     | 7.60E-01  | 1.10E-07  | CAD |
| Caffeine from tea | rs140775622 | 20  | 62962869  | C    | T     | 0.830545 | -0.02262 | 0.003207 | 0.011916       | 373522 | 4504.501    | 5.30E-04  | 1.80E-12  | CAD |
| Caffeine from tea | rs4817505   | 21  | 34343828  | T    | C     | 0.607874 | -0.01512 | 0.002292 | 0.01192        | 373522 | 4506.003    | 2.31E-04  | 4.20E-11  | CAD |
| Caffeine from tea | rs9624470   | 22  | 24820268  | G    | A     | 0.419254 | -0.02534 | 0.002272 | 0.011889       | 373522 | 4494.15     | 1.69E-01  | 6.80E-29  | CAD |
| Caffeine from tea | rs132919    | 22  | 41809903  | G    | C     | 0.22639  | -0.01708 | 0.002697 | 0.011893       | 373522 | 4495.762    | 6.25E-02  | 2.40E-10  | CAD |
| Caffeine from tea | rs9438624   | 1   | 26758044  | C    | T     | 0.19273  | -0.01535 | 0.002844 | 0.011885       | 373522 | 4492.773    | 4.63E-01  | 6.70E-08  | T2D |
| Caffeine from tea | rs11204710  | 1   | 150682110 | A    | G     | 0.619798 | -0.01427 | 0.002348 | 0.01196        | 373522 | 4521.319    | 9.45E-08  | 1.20E-09  | T2D |
| Caffeine from tea | rs56188862  | 1   | 174189269 | T    | C     | 0.614947 | 0.016829 | 0.002297 | 0.011884       | 373522 | 4492.339    | 7.38E-01  | 2.40E-13  | T2D |
| Caffeine from tea | rs78020607  | 3   | 50254624  | A    | G     | 0.887096 | -0.01866 | 0.003527 | 0.011906       | 373522 | 4500.895    | 3.64E-03  | 1.20E-07  | T2D |
| Caffeine from tea | rs2117137   | 3   | 89525505  | A    | G     | 0.594554 | -0.01349 | 0.002273 | 0.011896       | 373522 | 4497.011    | 2.98E-02  | 2.90E-09  | T2D |
| Caffeine from tea | rs1481012   | 4   | 89039082  | A    | G     | 0.887297 | 0.026005 | 0.003536 | 0.011945       | 373522 | 4515.799    | 1.13E-06  | 1.90E-13  | T2D |
| Caffeine from tea | rs192084998 | 5   | 152077481 | G    | A     | 0.703764 | 0.015836 | 0.002458 | 0.011885       | 373522 | 4492.581    | 5.55E-01  | 1.20E-10  | T2D |
| Caffeine from tea | rs2465018   | 6   | 51241140  | G    | A     | 0.769413 | -0.02211 | 0.002666 | 0.011975       | 373522 | 4527.092    | 4.55E-09  | 1.10E-16  | T2D |
| Caffeine from tea | rs139797380 | 6   | 137244957 | C    | G     | 0.991607 | 0.075145 | 0.013059 | 0.011926       | 373522 | 4508.398    | 4.72E-05  | 8.70E-09  | T2D |
| Caffeine from tea | rs4410790   | 7   | 17284577  | T    | C     | 0.36537  | -0.04033 | 0.00232  | 0.013193       | 373522 | 4993.793    | 6.01E-110 | 1.10E-67  | T2D |
| Caffeine from tea | rs6462899   | 7   | 39296489  | T    | A     | 0.375354 | -0.01259 | 0.002312 | 0.011893       | 373522 | 4495.738    | 6.31E-02  | 5.10E-08  | T2D |
| Caffeine from tea | rs17685     | 7   | 75616105  | G    | A     | 0.721688 | -0.02391 | 0.002488 | 0.012123       | 373522 | 4583.926    | 2.17E-21  | 7.20E-22  | T2D |
| Caffeine from tea | rs62534435  | 9   | 7042938   | C    | G     | 0.796528 | -0.01629 | 0.002776 | 0.011885       | 373522 | 4492.788    | 4.57E-01  | 4.40E-09  | T2D |
| Caffeine from tea | rs11022752  | 11  | 13307622  | A    | G     | 0.730907 | -0.01535 | 0.002525 | 0.011888       | 373522 | 4493.73     | 2.24E-01  | 1.20E-09  | T2D |
| Caffeine from tea | rs10741694  | 11  | 16286183  | T    | C     | 0.372823 | -0.01474 | 0.002312 | 0.011885       | 373522 | 4492.73     | 4.82E-01  | 1.80E-10  | T2D |
| Caffeine from tea | rs73053413  | 12  | 11329548  | C    | T     | 0.836535 | 0.021681 | 0.003021 | 0.011946       | 373522 | 4516.148    | 1.15E-06  | 7.10E-13  | T2D |
| Caffeine from tea | rs12591786  | 15  | 60902512  | C    | T     | 0.842256 | 0.019576 | 0.003109 | 0.011894       | 373522 | 4495.968    | 5.41E-02  | 3.00E-10  | T2D |
| Caffeine from tea | rs2472297   | 15  | 75027880  | C    | T     | 0.732806 | -0.05411 | 0.002521 | 0.013586       | 373522 | 5144.517    | 1.83E-138 | 3.30E-102 | T2D |
| Caffeine from tea | rs28429148  | 16  | 53798319  | G    | A     | 0.565413 | 0.013189 | 0.002288 | 0.012094       | 373522 | 4572.593    | 6.52E-19  | 8.20E-09  | T2D |
| Caffeine from tea | rs153328    | 16  | 63025865  | C    | G     | 0.782673 | -0.01445 | 0.002718 | 0.011884       | 373522 | 4492.32     | 7.60E-01  | 1.10E-07  | T2D |
| Caffeine from tea | rs140775622 | 20  | 62962869  | C    | T     | 0.830545 | -0.02262 | 0.003207 | 0.011916       | 373522 | 4504.501    | 5.30E-04  | 1.80E-12  | T2D |
| Caffeine from tea | rs4817505   | 21  | 34343828  | T    | C     | 0.607874 | -0.01512 | 0.002292 | 0.01192        | 373522 | 4506.003    | 2.31E-04  | 4.20E-11  | T2D |
| Caffeine from tea | rs9624470   | 22  | 24820268  | G    | A     | 0.419254 | -0.02534 | 0.002272 | 0.011889       | 373522 | 4494.15     | 1.69E-01  | 6.80E-29  | T2D |
| Caffeine from tea | rs132919    | 22  | 41809903  | G    | C     | 0.22639  | -0.01708 | 0.002697 | 0.011893       | 373522 | 4495.762    | 6.25E-02  | 2.40E-10  | T2D |

P values from the linear regression in STATA may differ from the GWAS P value since BOLT-LMM assumes a slightly different model. An F-statistic >10 indicates low risk of weak instrument bias in Mendelian randomization analyses. F-statistics were calculated as  $F=R^2*(n-2)/(1-R^2)$  where  $R^2$  is the proportion of variability in caffeine intake explained by the SNP. The outcome of the MR for which the SNPs are included is indicated by CAD or MR. Abbreviations: SNP, single nucleotide polymorphism; CHR, chromosome; EFAL, effect allele; NEFAL, non-effect allele; EF Freq, effect allele frequency; SE, standard error; CAD, coronary artery disease; T2D, type 2 diabetes; MR, Mendelian randomization.

**Table S24. Heterogeneity ( $I^2$ , Cochran's Q, Rucker's Q', and Q-Q'), pleiotropy (MR-Egger intercept) and weak instrument statistics ( $I^2_{GX}$ ) in Mendelian randomization analyses between caffeine intake and CAD or T2D**

| Exposure                 | Outcome | $I^2$ index | $I^2$ 95%CI min | $I^2$ 95%CI max | Cochran's Q | df Cochran's Q | P value Cochran's Q | Rucker's Q' | df Rucker's Q' | P value Rucker's Q' | Q-Q'     | df Q-Q' | P value Q-Q' | MR-Egger intercept | SE MR-Egger intercept | P value MR-Egger intercept | $I^2_{GX}$ |
|--------------------------|---------|-------------|-----------------|-----------------|-------------|----------------|---------------------|-------------|----------------|---------------------|----------|---------|--------------|--------------------|-----------------------|----------------------------|------------|
| Combined caffeine intake | CAD     | 0.6872<br>2 | 0.55735         | 0.77899         | 110         | 34             | 9.70E-10            | 110         | 33             | 5.40E-10            | 8.70E-02 | 1       | 0.77         | -0.00091           | 0.00559               | 0.87                       | 0.99       |
| Caffeine from coffee     | CAD     | 0.8085<br>6 | 0.71856         | 0.86978         | 110         | 21             | 5.40E-14            | 110         | 20             | 8.90E-14            | 3.3      | 1       | 0.069        | -0.00900           | 0.01140               | 0.44                       | 0.99       |
| Caffeine from tea        | CAD     | 0.6063<br>8 | 0.38546         | 0.74788         | 58          | 23             | 6.40E-05            | 53          | 22             | 2.30E-04            | 5.5      | 1       | 0.019        | -0.01290           | 0.00854               | 0.15                       | 0.98       |
| Combined caffeine intake | T2D     | 0.7103<br>8 | 0.59298         | 0.79391         | 120         | 34             | 4.20E-11            | 110         | 33             | 1.50E-10            | 5.3      | 1       | 0.021        | 0.00911            | 0.00726               | 0.22                       | 0.99       |
| Caffeine from coffee     | T2D     | 0.8459<br>9 | 0.78048         | 0.89195         | 140         | 22             | 1.10E-19            | 130         | 21             | 1.30E-18            | 8.1      | 1       | 0.004        | 0.01744            | 0.01550               | 0.27                       | 0.99       |
| Caffeine from tea        | T2D     | 0.7976<br>0 | 0.70575         | 0.86078         | 110         | 23             | 5.70E-14            | 100         | 22             | 8.70E-13            | 8.7      | 1       | 0.003        | -0.02059           | 0.01527               | 0.19                       | 0.98       |

Abbreviations: CAD, coronary artery disease; T2D, type 2 diabetes; MR, Mendelian randomization; df, degrees of freedom

**Table S25. Excluded variants in MR-PRESSO analyses on CAD and T2D**

| Combined caffeine intake SNPs |                    |         |         | Caffeine from coffee SNPs |                    |         |         | Caffeine from tea SNPs |                    |         |         |
|-------------------------------|--------------------|---------|---------|---------------------------|--------------------|---------|---------|------------------------|--------------------|---------|---------|
| Outlier SNP                   | RSS <sub>obs</sub> | P value | Outcome | Outlier SNP               | RSS <sub>obs</sub> | P value | Outcome | Outlier SNP            | RSS <sub>obs</sub> | P value | Outcome |
| rs1490384                     | 0.001195111        | 0.05    | CAD     | rs2350633                 | 0.001956           | <0.05   | CAD     | rs11022752             | 0.002              | <0.05   | CAD     |
| rs4418728                     | 0.001363837        | <0.05   | CAD     | rs2521501                 | 0.00415            | <0.05   | CAD     | rs4410790              | 0.0014             | <0.05   | CAD     |
| rs489693                      | 0.002065843        | <0.05   | CAD     | rs66723169                | 0.003039           | <0.05   | CAD     | rs28429148             | 0.0151             | <0.05   | T2D     |
| rs595529                      | 0.002935062        | <0.05   | CAD     | rs7412396                 | 0.000736           | 0.05    | CAD     |                        |                    |         |         |
| rs1490384                     | 0.003607685        | <0.05   | T2D     | rs2350633                 | 0.00191            | <0.05   | T2D     |                        |                    |         |         |
| rs2667773                     | 0.001851194        | <0.05   | T2D     | rs28567725                | 0.012255           | <0.05   | T2D     |                        |                    |         |         |
| rs489693                      | 0.002973746        | <0.05   | T2D     | rs66723169                | 0.002487           | <0.05   | T2D     |                        |                    |         |         |

Mendelian Randomization Pleiotropy RESidual Sum and Outlier (MR-PRESSO) outlier information for the excluded variants per outcome. Abbreviations: CAD, coronary artery disease; T2D, type 2 diabetes; SNP, single nucleotide polymorphism, RSS<sub>obs</sub>, observed residual sum of squares

**Table S26. Mendelian randomization analyses results after MR-Steiger filtering**

| MR Method                                                 | n SNPs | Beta  | SE   | P value  | Outcome | Filtered SNPs                        | Exposure             |
|-----------------------------------------------------------|--------|-------|------|----------|---------|--------------------------------------|----------------------|
| Inverse variance weighted (fixed effects)                 | 32     | 0.09  | 0.06 | 0.166    | CAD     | rs4418728<br>rs489693<br>rs595529    | Combined caffeine    |
| MR Egger                                                  | 32     | 0.18  | 0.13 | 0.182    |         |                                      |                      |
| Weighted median                                           | 32     | 0.05  | 0.11 | 0.653    |         |                                      |                      |
| Inverse variance weighted (multiplicative random effects) | 32     | 0.09  | 0.08 | 0.274    |         |                                      |                      |
| Weighted mode                                             | 32     | 0.14  | 0.09 | 0.121    |         |                                      |                      |
| Inverse variance weighted (fixed effects)                 | 19     | 0.27  | 0.10 | 0.01     | CAD     | rs2350633<br>rs2521501<br>rs66723169 | Caffeine from coffee |
| MR Egger                                                  | 19     | 0.27  | 0.28 | 0.35     |         |                                      |                      |
| Weighted median                                           | 19     | 0.29  | 0.15 | 0.05     |         |                                      |                      |
| Inverse variance weighted (multiplicative random effects) | 19     | 0.27  | 0.14 | 0.05     |         |                                      |                      |
| Weighted mode                                             | 19     | 0.06  | 0.18 | 0.76     |         |                                      |                      |
| Inverse variance weighted (fixed effects)                 | 23     | 0.01  | 0.11 | 0.91     | CAD     | rs11022752                           | Caffeine from tea    |
| MR Egger                                                  | 23     | 0.37  | 0.34 | 0.30     |         |                                      |                      |
| Weighted median                                           | 23     | -0.05 | 0.19 | 0.78     |         |                                      |                      |
| Inverse variance weighted (multiplicative random effects) | 23     | 0.01  | 0.15 | 0.93     |         |                                      |                      |
| Weighted mode                                             | 23     | 0.03  | 0.25 | 0.92     |         |                                      |                      |
| Inverse variance weighted (fixed effects)                 | 34     | 0.25  | 0.08 | 2.01E-03 | T2D     | rs1490384                            | Combined caffeine    |
| MR Egger                                                  | 34     | 0.12  | 0.21 | 0.59     |         |                                      |                      |
| Weighted median                                           | 34     | 0.14  | 0.11 | 0.21     |         |                                      |                      |
| Inverse variance weighted (multiplicative random effects) | 34     | 0.25  | 0.13 | 0.07     |         |                                      |                      |
| Weighted mode                                             | 34     | 0.16  | 0.11 | 0.13     |         |                                      |                      |
| Inverse variance weighted (fixed effects)                 | 22     | 0.43  | 0.12 | 4.51E-04 | T2D     | rs28567725                           | Caffeine from coffee |
| MR Egger                                                  | 22     | 0.09  | 0.41 | 0.83     |         |                                      |                      |

| MR Method                                                 | n SNPs | Beta | SE   | P value | Outcome | Filtered SNPs | Exposure          |
|-----------------------------------------------------------|--------|------|------|---------|---------|---------------|-------------------|
| Weighted median                                           | 22     | 0.24 | 0.17 | 0.17    |         |               |                   |
| Inverse variance weighted (multiplicative random effects) | 22     | 0.43 | 0.21 | 0.04    |         |               |                   |
| Weighted mode                                             | 22     | 0.24 | 0.16 | 0.15    |         |               |                   |
| Inverse variance weighted (fixed effects)                 | 23     | 0.22 | 0.14 | 0.12    | T2D     | rs28429148    | Caffeine from tea |
| MR Egger                                                  | 23     | 0.37 | 0.35 | 0.30    |         |               |                   |
| Weighted median                                           | 23     | 0.27 | 0.20 | 0.18    |         |               |                   |
| Inverse variance weighted (multiplicative random effects) | 23     | 0.22 | 0.15 | 0.15    |         |               |                   |
| Weighted mode                                             | 23     | 0.23 | 0.21 | 0.29    |         |               |                   |

Mendelian randomization (MR) analysis method results for the association between genetically determined higher caffeine intake on coronary artery disease or type 2 diabetes after filtering of SNPs more strongly associated (R<sup>2</sup>) with the outcome than the exposure. Beta's are per standard deviation increase in genetically determined caffeine intake.

**Table S27. SNPs and proxies for Mendelian Randomization analyses for combined caffeine intake on type 2 diabetes**

| SNP         | CHR | BP        | ALLELE1 | ALLELE0 | A1FREQ   | BETA     | SE       | P value   | Proxy for          | R <sup>2</sup> |
|-------------|-----|-----------|---------|---------|----------|----------|----------|-----------|--------------------|----------------|
| rs7412396   | 1   | 150666797 | G       | A       | 0.597491 | -0.02279 | 0.002364 | 5.50E-22  | rs768283768        | 0.930744       |
| rs2987869   | 1   | 174789407 | G       | T       | 0.458638 | -0.01562 | 0.002332 | 2.10E-11  | 1:174856749_TG_T   | 0.998626       |
| rs1260326   | 2   | 27730940  | T       | C       | 0.391852 | -0.02297 | 0.002377 | 4.20E-22  |                    |                |
| rs78456557  | 3   | 123300686 | C       | G       | 0.900201 | -0.02364 | 0.00389  | 1.20E-09  |                    |                |
| rs114066728 | 3   | 142022265 | T       | C       | 0.870043 | -0.02127 | 0.003456 | 7.50E-10  | rs115454798        | 0.991139       |
| rs2231142   | 4   | 89052323  | G       | T       | 0.886707 | 0.03913  | 0.00366  | 1.10E-26  |                    |                |
| rs62332762  | 4   | 106143492 | C       | T       | 0.597585 | 0.01828  | 0.002368 | 1.20E-14  |                    |                |
| rs12514566  | 5   | 7391462   | G       | A       | 0.664698 | 0.017242 | 0.002456 | 2.20E-12  |                    |                |
| rs1872841   | 6   | 98576688  | C       | A       | 0.483724 | -0.01316 | 0.002328 | 1.60E-08  | rs754177720        | 0.902704       |
| rs9486902   | 6   | 108878052 | C       | T       | 0.837869 | 0.018849 | 0.00315  | 2.20E-09  | 6:108876096_CAAT_C | 0.997488       |
| rs1490384   | 6   | 126851160 | C       | T       | 0.501467 | -0.01587 | 0.002323 | 8.30E-12  |                    |                |
| rs139797380 | 6   | 137244957 | C       | G       | 0.991601 | 0.106741 | 0.013575 | 3.70E-15  |                    |                |
| rs4410790   | 7   | 17284577  | T       | C       | 0.364122 | -0.08137 | 0.002412 | 1.50E-249 |                    |                |
| rs215601    | 7   | 32333921  | A       | C       | 0.372618 | 0.01488  | 0.002404 | 6.00E-10  |                    |                |
| rs34060476  | 7   | 73037956  | A       | G       | 0.865587 | -0.03535 | 0.003404 | 2.90E-25  | 7:73042302_GCTTT_G | 0.99198        |
| rs17685     | 7   | 75616105  | G       | A       | 0.721471 | -0.0408  | 0.002584 | 3.80E-56  |                    |                |
| rs4240624   | 8   | 9184231   | G       | A       | 0.092461 | 0.02693  | 0.004012 | 1.90E-11  |                    |                |
| rs12785227  | 10  | 65262685  | A       | G       | 0.685798 | 0.014549 | 0.002507 | 6.50E-09  |                    |                |
| rs4418728   | 10  | 94839724  | G       | T       | 0.550788 | 0.014384 | 0.002333 | 7.00E-10  |                    |                |
| rs117810762 | 10  | 135315795 | G       | A       | 0.982023 | -0.06827 | 0.008863 | 1.30E-14  |                    |                |
| rs6265      | 11  | 27679916  | C       | T       | 0.810755 | 0.021572 | 0.002964 | 3.40E-13  |                    |                |
| rs1228024   | 11  | 47951353  | C       | A       | 0.340021 | 0.013965 | 0.002453 | 1.30E-08  |                    |                |
| rs7105462   | 11  | 112912048 | G       | A       | 0.40559  | 0.014163 | 0.002366 | 2.10E-09  |                    |                |
| rs607316    | 12  | 111969448 | C       | T       | 0.795666 | -0.01678 | 0.002878 | 5.50E-09  | rs376877108        | 0.993627       |
| rs12591786  | 15  | 60902512  | C       | T       | 0.842038 | 0.020213 | 0.00323  | 3.90E-10  |                    |                |
| rs2472297   | 15  | 75027880  | C       | T       | 0.731645 | -0.10487 | 0.002616 | 2.4E-351  |                    |                |
| rs2667773   | 15  | 77872191  | A       | G       | 0.686772 | 0.014947 | 0.002506 | 2.50E-09  |                    |                |

| SNP         | CHR | BP       | ALLELE1 | ALLELE0 | A1FREQ   | BETA     | SE       | P value  | Proxy for           | R <sup>2</sup> |
|-------------|-----|----------|---------|---------|----------|----------|----------|----------|---------------------|----------------|
| rs3965574   | 16  | 18789966 | A       | G       | 0.61805  | 0.013716 | 0.002416 | 1.40E-08 | 16:18776851_G_GA    | 0.934833       |
| rs489693    | 18  | 57882787 | C       | A       | 0.67465  | -0.01759 | 0.002478 | 1.30E-12 |                     |                |
| rs56113850  | 19  | 41353107 | T       | C       | 0.421755 | -0.02649 | 0.002351 | 1.90E-29 |                     |                |
| rs61599759  | 19  | 47557472 | A       | G       | 0.245811 | -0.01741 | 0.002732 | 1.80E-10 | rs61141867          | 0.984394       |
| rs1291145   | 20  | 35528475 | T       | C       | 0.313259 | -0.01456 | 0.002506 | 6.30E-09 | 20:35568001_AAAAG_A | 0.998402       |
| rs6062679   | 20  | 62889991 | T       | C       | 0.534615 | -0.02278 | 0.002358 | 4.50E-22 |                     |                |
| rs138019862 | 22  | 24821154 | G       | T       | 0.986106 | 0.093407 | 0.009925 | 4.90E-21 | rs199612805         | 1              |
| rs9611527   | 22  | 41644428 | G       | A       | 0.664286 | 0.019792 | 0.002466 | 1.00E-15 |                     |                |

Sentinel single nucleotide polymorphisms (SNPs) and proxies used are provided for the Mendelian randomization analyses. In case a proxy was used, the original sentinel SNP is provided in the "Proxy for" column and the R<sup>2</sup> between them in the "R<sup>2</sup>" column. No proxy with R<sup>2</sup>>0.8 was available for 3:50895869\_ATAATAATAAT\_A and rs531431865, which were therefore excluded from analyses.

**Table S28. SNPs and proxies for Mendelian Randomization analyses for caffeine from coffee on type 2 diabetes**

| SNP         | CHR | BP        | ALLELE1 | ALLELE0 | A1FREQ   | BETA     | SE       | P value   | Proxy for   | R <sup>2</sup> |
|-------------|-----|-----------|---------|---------|----------|----------|----------|-----------|-------------|----------------|
| rs4615895   | 1   | 96274668  | G       | A       | 0.259574 | -0.01705 | 0.002627 | 8.60E-11  |             |                |
| rs7412396   | 1   | 150666797 | G       | A       | 0.597371 | -0.01297 | 0.002337 | 2.90E-08  | rs768283768 | 0.930744       |
| rs7561317   | 2   | 644953    | A       | G       | 0.171158 | -0.02037 | 0.003043 | 2.20E-11  | rs7571970   | 0.99315        |
| rs11127048  | 2   | 27752463  | G       | A       | 0.381191 | -0.01997 | 0.002398 | 8.10E-17  |             |                |
| rs35198275  | 3   | 50536092  | A       | G       | 0.865693 | 0.020797 | 0.003387 | 8.20E-10  |             |                |
| rs2726513   | 4   | 106217358 | G       | T       | 0.587077 | 0.015301 | 0.002347 | 7.00E-11  |             |                |
| rs12514566  | 5   | 7391462   | G       | A       | 0.664625 | 0.014831 | 0.002428 | 1.00E-09  |             |                |
| rs6893807   | 5   | 87965021  | A       | G       | 0.843563 | -0.01916 | 0.003159 | 1.30E-09  |             |                |
| rs1327259   | 6   | 51177811  | A       | G       | 0.614152 | 0.015707 | 0.002365 | 3.10E-11  |             |                |
| rs4410790   | 7   | 17284577  | T       | C       | 0.364412 | -0.05171 | 0.002384 | 2.80E-104 |             |                |
| rs34060476  | 7   | 73037956  | A       | G       | 0.865581 | -0.02519 | 0.003365 | 7.10E-14  |             |                |
| rs1057868   | 7   | 75615006  | C       | T       | 0.714413 | -0.02445 | 0.002536 | 5.50E-22  |             |                |
| rs76881016  | 10  | 134196286 | A       | G       | 0.928496 | -0.02584 | 0.004453 | 6.60E-09  |             |                |
| rs117810762 | 10  | 135315795 | G       | A       | 0.982047 | -0.05011 | 0.008765 | 1.10E-08  |             |                |
| rs2298527   | 11  | 112851961 | G       | C       | 0.405568 | 0.014947 | 0.002336 | 1.60E-10  |             |                |
| rs2472297   | 15  | 75027880  | C       | T       | 0.731859 | -0.06521 | 0.002587 | 3.10E-140 |             |                |
| rs2521501   | 15  | 91437388  | A       | T       | 0.677316 | 0.014916 | 0.002472 | 1.60E-09  |             |                |
| rs28567725  | 16  | 53826028  | T       | C       | 0.5877   | -0.02172 | 0.002331 | 1.20E-20  | rs201399553 | 0.945928       |
| rs2350633   | 17  | 17587395  | A       | G       | 0.486877 | -0.01469 | 0.002296 | 1.60E-10  | rs139937261 | 0.997277       |
| rs66723169  | 18  | 57808978  | C       | A       | 0.769043 | -0.02249 | 0.002732 | 1.80E-16  |             |                |
| rs56113850  | 19  | 41353107  | T       | C       | 0.421821 | -0.02071 | 0.002323 | 4.90E-19  |             |                |
| rs6063085   | 20  | 45840459  | A       | C       | 0.625251 | -0.01571 | 0.00237  | 3.40E-11  |             |                |
| rs181251778 | 22  | 24901968  | A       | G       | 0.986146 | 0.072648 | 0.009834 | 1.50E-13  |             |                |

Sentinel single nucleotide polymorphisms (SNPs) and proxies used are provided for the Mendelian randomization analyses. In case a proxy was used, the original sentinel SNP is provided in the "Proxy for" column and the R<sup>2</sup> between them in the "R<sup>2</sup>" column. No proxy with R<sup>2</sup>>0.8 was available for rs531431865, which was therefore excluded from analyses.



**Table S29. SNPs and proxies for Mendelian Randomization analyses for caffeine from tea on type 2 diabetes**

| SNP         | CHR | BP        | ALLELE1 | ALLELE0 | A1FREQ   | BETA     | SE       | P value   | Proxy for   | R <sup>2</sup> |
|-------------|-----|-----------|---------|---------|----------|----------|----------|-----------|-------------|----------------|
| rs9438624   | 1   | 26758044  | C       | T       | 0.19273  | -0.01535 | 0.002844 | 6.70E-08  | rs77476394  | 0.887444       |
| rs11204710  | 1   | 150682110 | A       | G       | 0.619798 | -0.01427 | 0.002348 | 1.20E-09  | rs11204711  | 0.998421       |
| rs56188862  | 1   | 174189269 | T       | C       | 0.614947 | 0.016829 | 0.002297 | 2.40E-13  |             |                |
| rs78020607  | 3   | 50254624  | A       | G       | 0.887096 | -0.01866 | 0.003527 | 1.20E-07  | rs145755097 | 0.869438       |
| rs2117137   | 3   | 89525505  | A       | G       | 0.594554 | -0.01349 | 0.002273 | 2.90E-09  |             |                |
| rs1481012   | 4   | 89039082  | A       | G       | 0.887297 | 0.026005 | 0.003536 | 1.90E-13  |             |                |
| rs192084998 | 5   | 152077481 | G       | A       | 0.703764 | 0.015836 | 0.002458 | 1.20E-10  |             |                |
| rs2465018   | 6   | 51241140  | G       | A       | 0.769413 | -0.02211 | 0.002666 | 1.10E-16  |             |                |
| rs139797380 | 6   | 137244957 | C       | G       | 0.991607 | 0.075145 | 0.013059 | 8.70E-09  |             |                |
| rs4410790   | 7   | 17284577  | T       | C       | 0.36537  | -0.04033 | 0.00232  | 1.10E-67  |             |                |
| rs6462899   | 7   | 39296489  | T       | A       | 0.375354 | -0.01259 | 0.002312 | 5.10E-08  | rs141180025 | 0.943469       |
| rs17685     | 7   | 75616105  | G       | A       | 0.721688 | -0.02391 | 0.002488 | 7.20E-22  |             |                |
| rs62534435  | 9   | 7042938   | C       | G       | 0.796528 | -0.01629 | 0.002776 | 4.40E-09  |             |                |
| rs11022752  | 11  | 13307622  | A       | G       | 0.730907 | -0.01535 | 0.002525 | 1.20E-09  |             |                |
| rs10741694  | 11  | 16286183  | T       | C       | 0.372823 | -0.01474 | 0.002312 | 1.80E-10  |             |                |
| rs73053413  | 12  | 11329548  | C       | T       | 0.836535 | 0.021681 | 0.003021 | 7.10E-13  |             |                |
| rs12591786  | 15  | 60902512  | C       | T       | 0.842256 | 0.019576 | 0.003109 | 3.00E-10  |             |                |
| rs2472297   | 15  | 75027880  | C       | T       | 0.732806 | -0.05411 | 0.002521 | 3.30E-102 |             |                |
| rs28429148  | 16  | 53798319  | G       | A       | 0.565413 | 0.013189 | 0.002288 | 8.20E-09  |             |                |
| rs153328    | 16  | 63025865  | C       | G       | 0.782673 | -0.01445 | 0.002718 | 1.10E-07  | rs199602679 | 0.976937       |
| rs140775622 | 20  | 62962869  | C       | T       | 0.830545 | -0.02262 | 0.003207 | 1.80E-12  |             |                |
| rs4817505   | 21  | 34343828  | T       | C       | 0.607874 | -0.01512 | 0.002292 | 4.20E-11  |             |                |
| rs9624470   | 22  | 24820268  | G       | A       | 0.419254 | -0.02534 | 0.002272 | 6.80E-29  |             |                |
| rs132919    | 22  | 41809903  | G       | C       | 0.22639  | -0.01708 | 0.002697 | 2.40E-10  |             |                |

Sentinel single nucleotide polymorphisms (SNPs) and proxies used are provided for the Mendelian randomization analyses. In case a proxy was used, the original sentinel SNP is provided in the "Proxy for" column and the R<sup>2</sup> between them in the "R<sup>2</sup>" column

**Figure S1. UK Biobank study population selection**

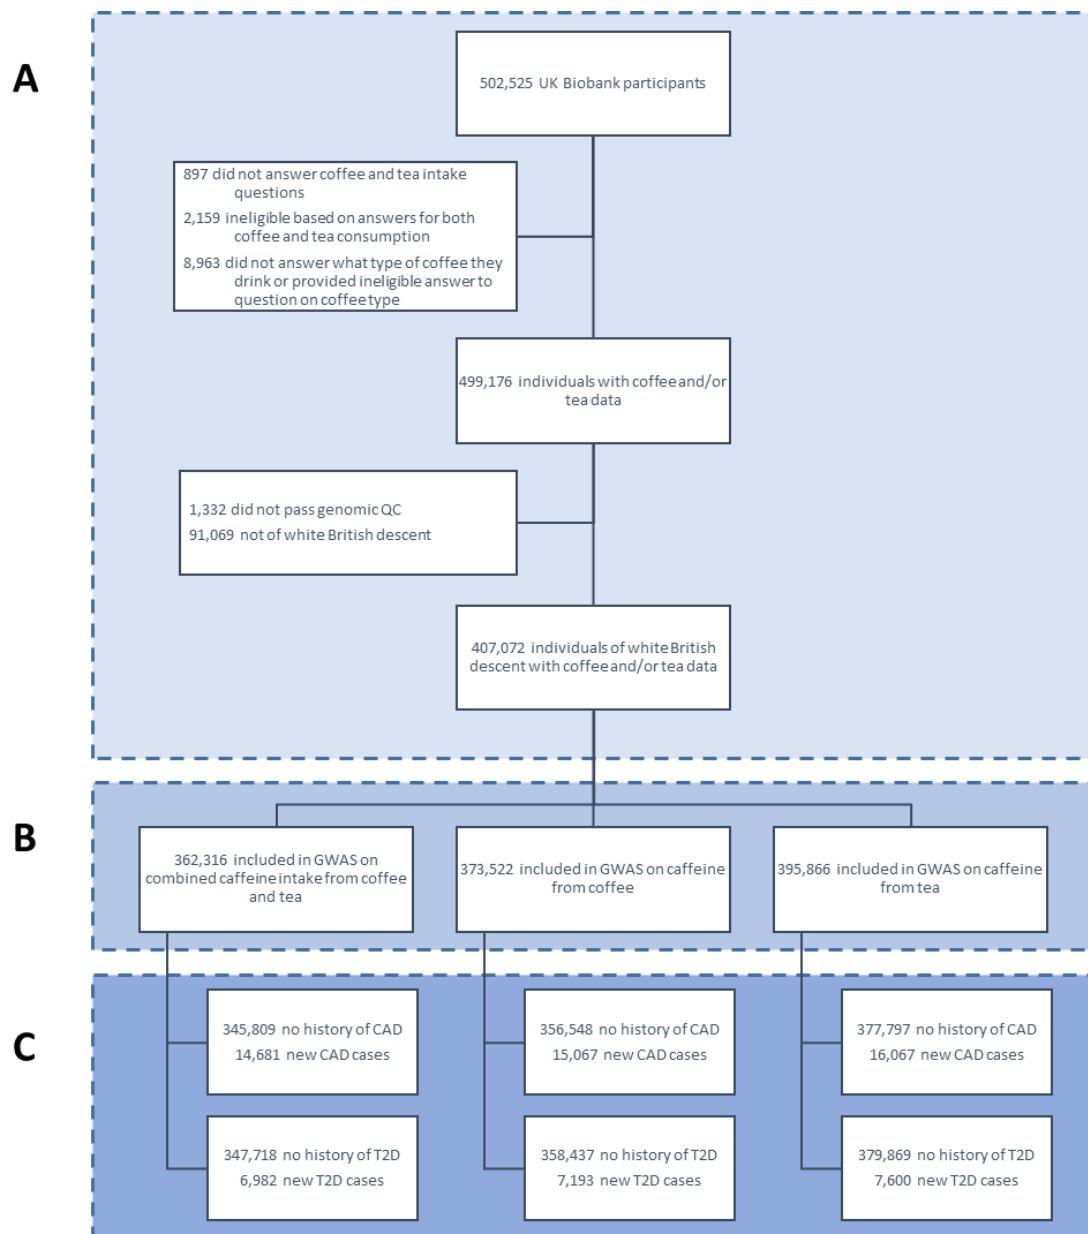

Study sample selection flowchart. Section A depicts the selection procedure leading up to the total number of participants included in one or more genome wide association study (B) and the number of new-onset cases and controls within each genetic cohort that were included in observational analyses. Abbreviations: CAD, coronary artery disease; GWAS, genome wide association study; T2D, type 2 diabetes; QC, quality control

**Figure S2. Manhattan plot for caffeine from coffee**

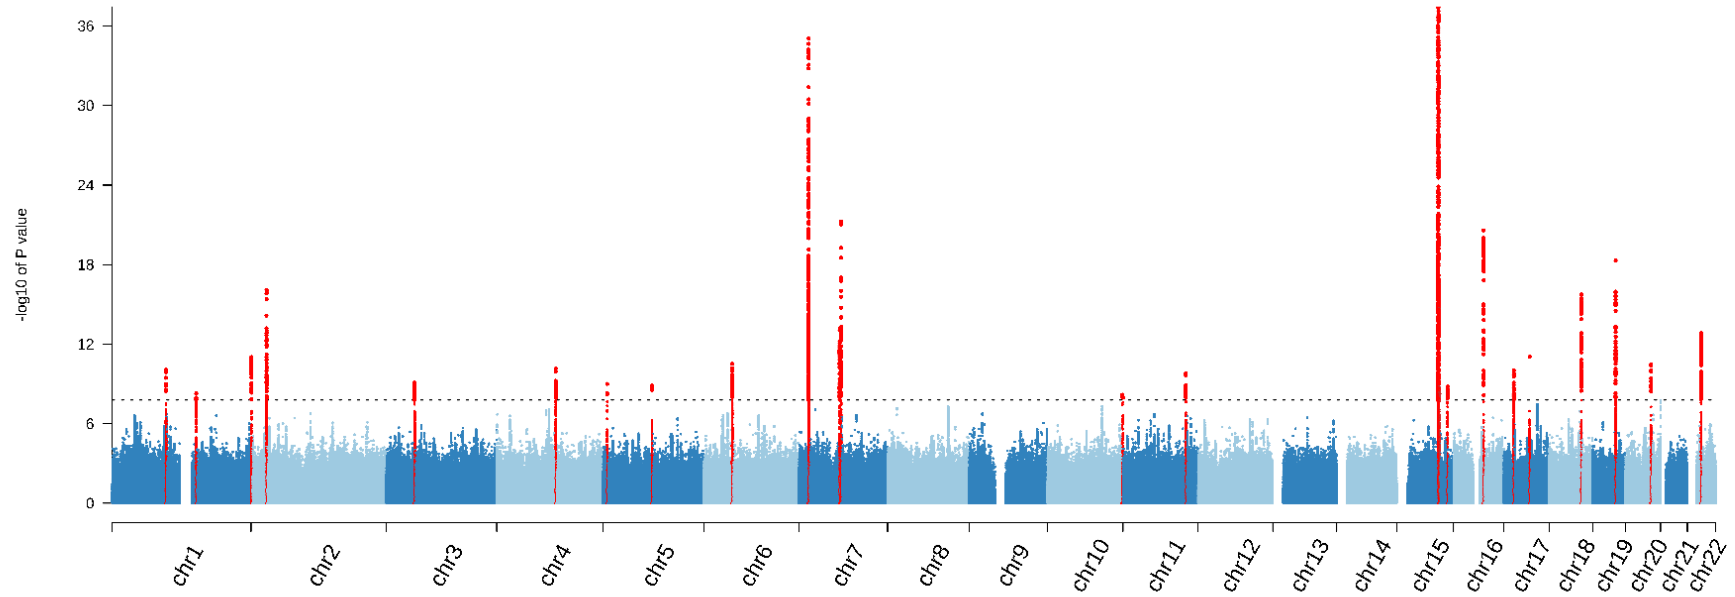

Manhattan plot showing the results for the genome-wide associations with caffeine from coffee in the UK Biobank with the  $-\log_{10} P$  value on the vertical axis. The sentinel single nucleotide polymorphisms that reached genome-wide significance ( $P < 1.67 \times 10^{-8}$ ) are colored red.

**Figure S3. Manhattan plot for caffeine from tea**

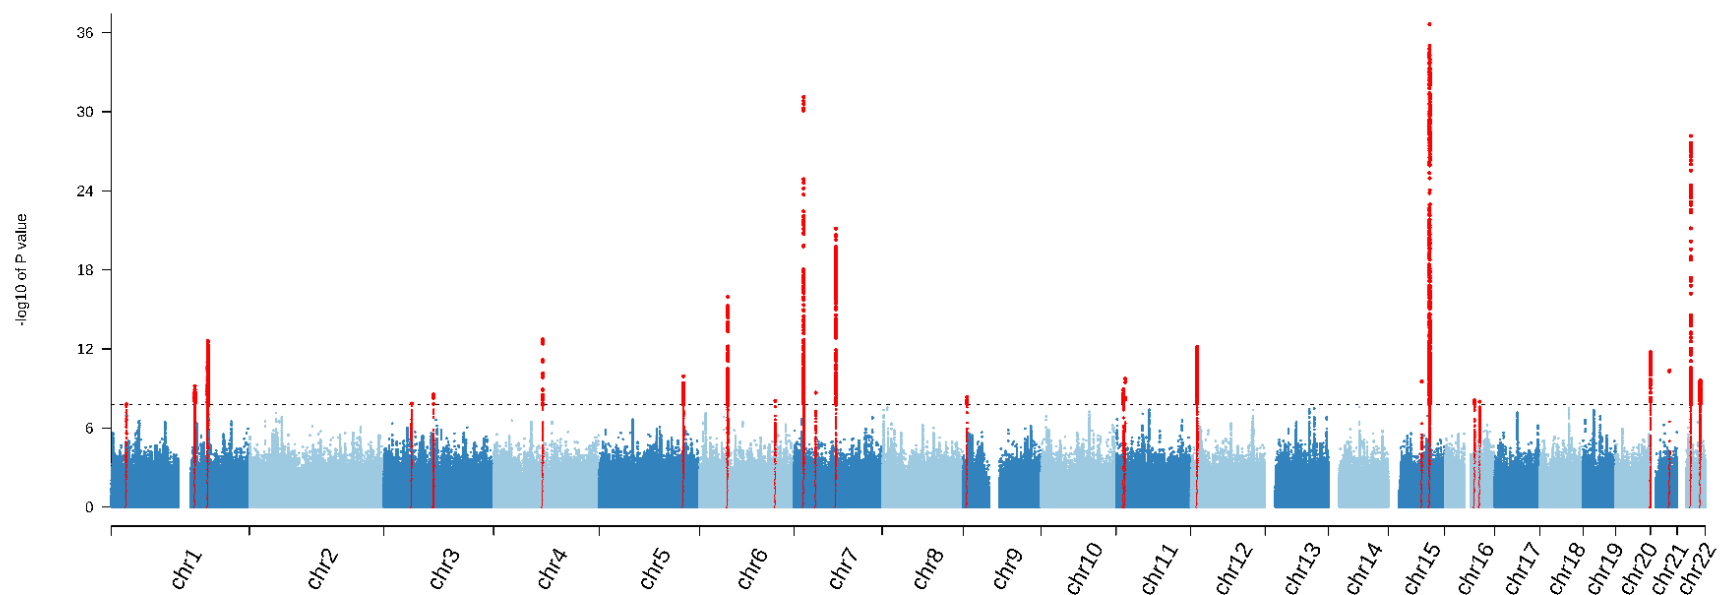

Manhattan plot showing the results for the genome-wide associations with caffeine from tea in the UK Biobank with the  $-\log_{10} P$  value on the vertical axis. The sentinel single nucleotide polymorphisms that reached genome-wide significance ( $P < 1.67 \times 10^{-8}$ ) are colored red.

**Figure S4. Overlay Manhattan plot based on lowest P value for all caffeine intake traits**

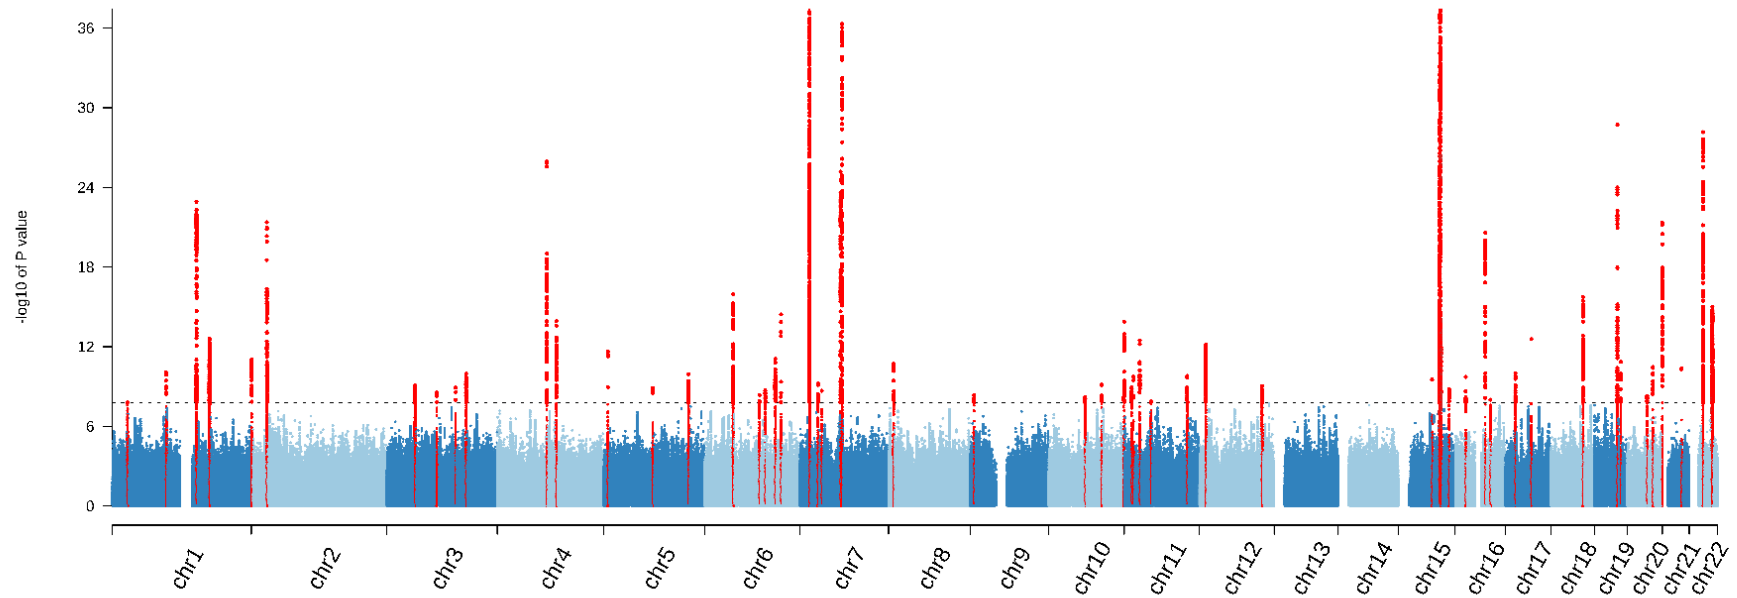

Overlay Manhattan plot showing the results for the genome-wide associations with caffeine intake over all traits based on the lowest  $P$  value within the UK Biobank with the  $-\log_{10} P$  value on the vertical axis. The sentinel single nucleotide polymorphisms that reached genome-wide significance ( $P < 1.67 \times 10^{-8}$ ) are colored red.

**Figure S5. Locus plots for combined caffeine intake**

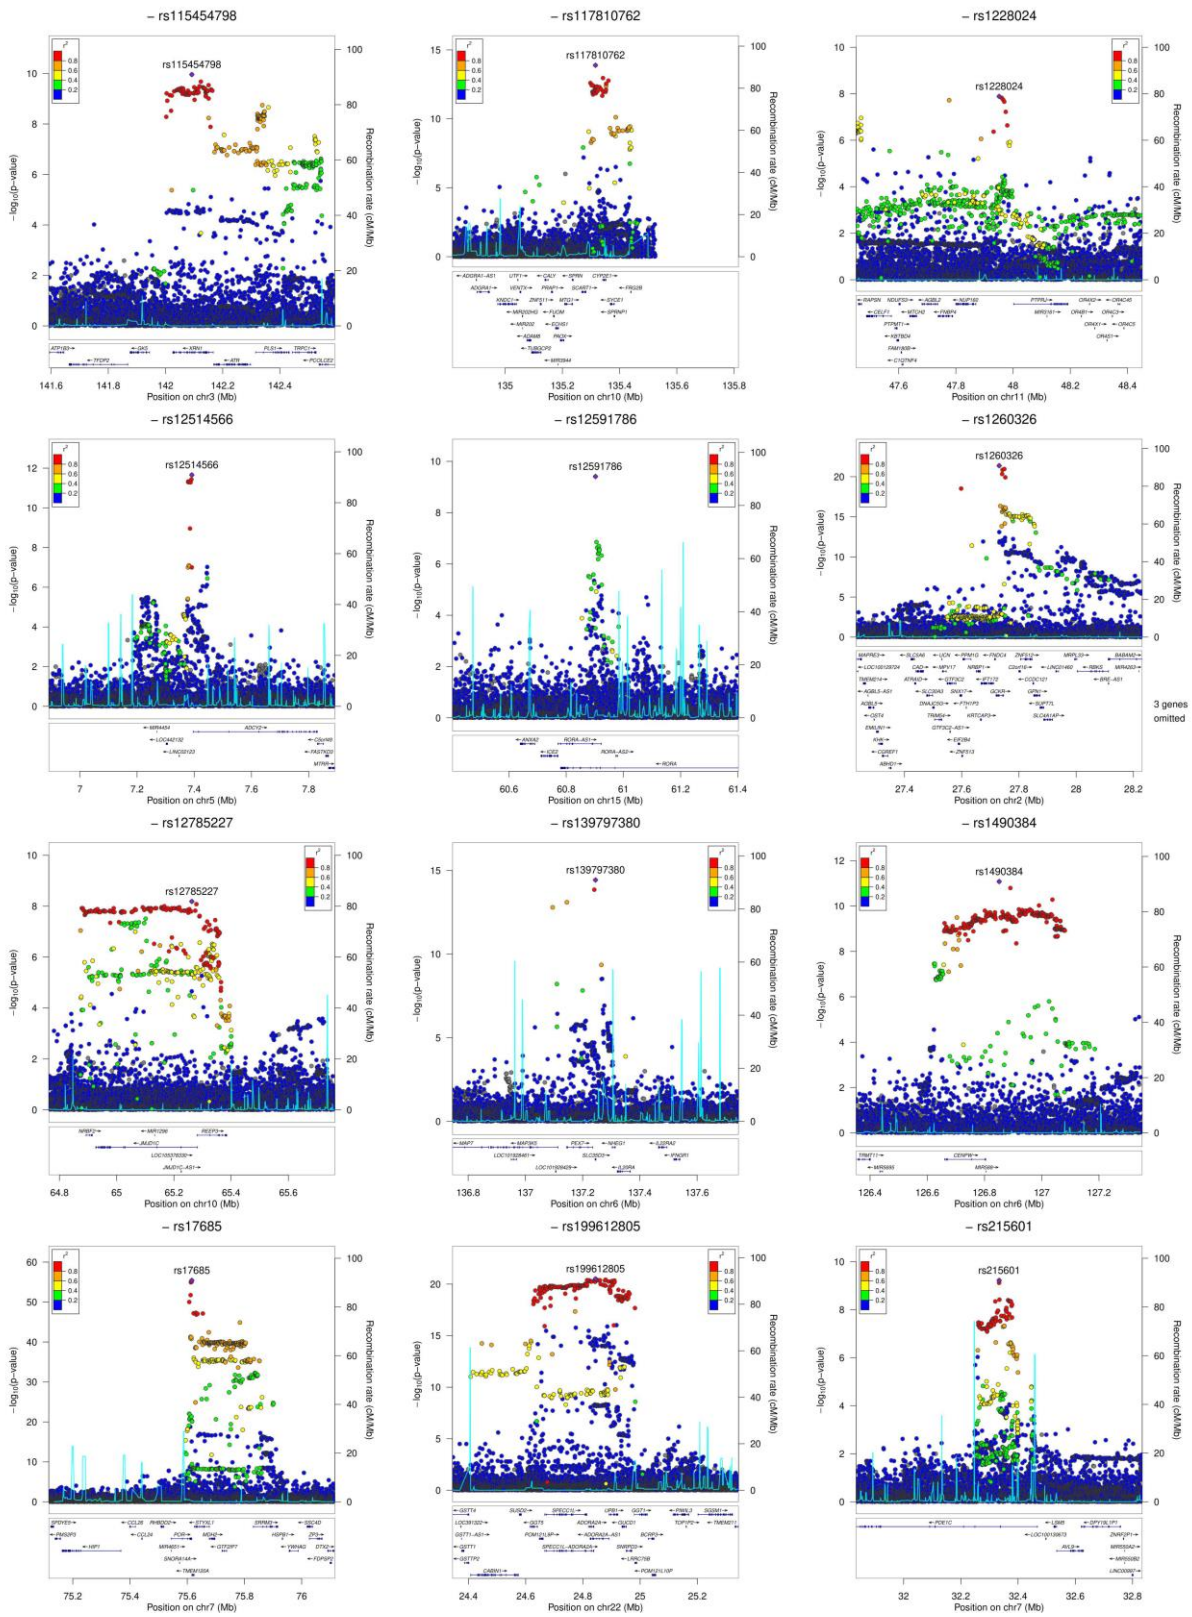

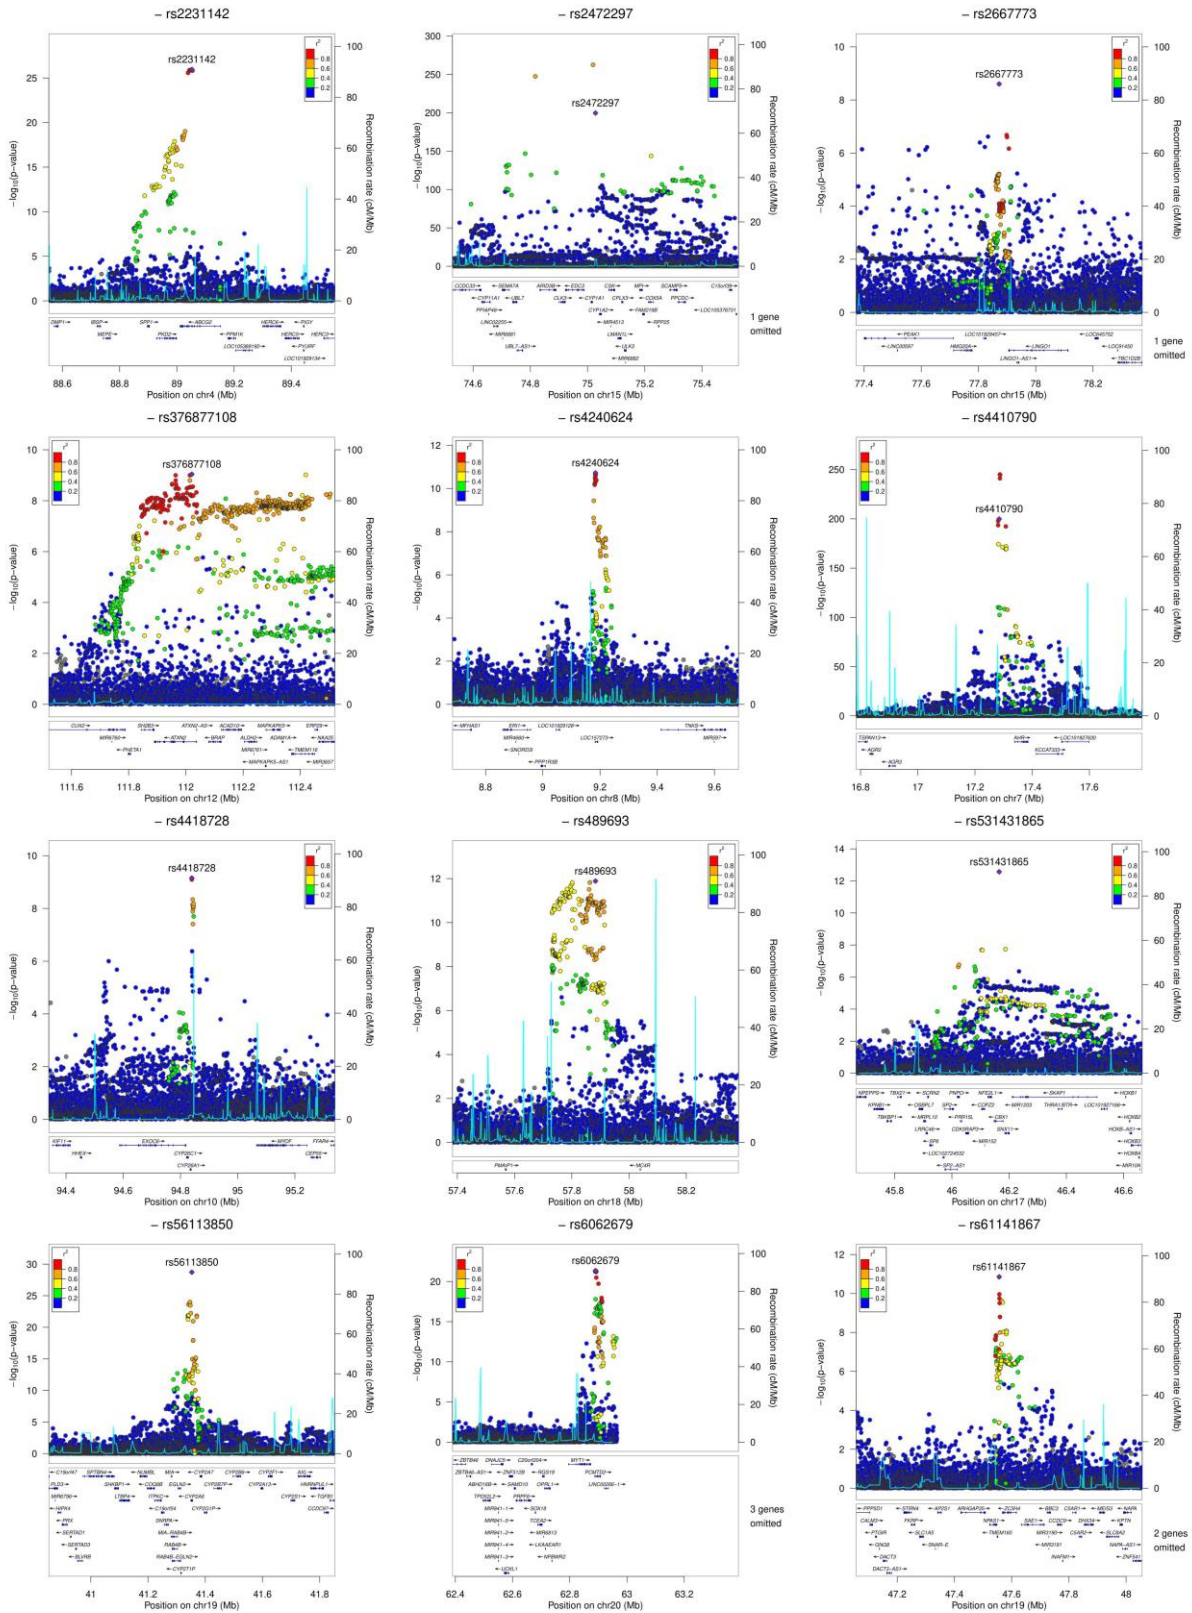

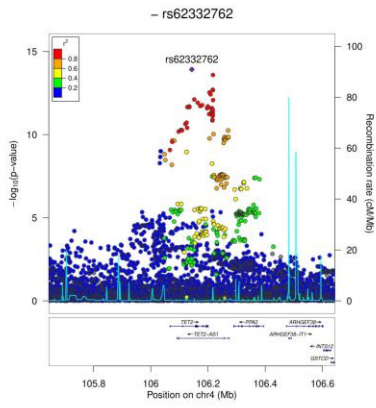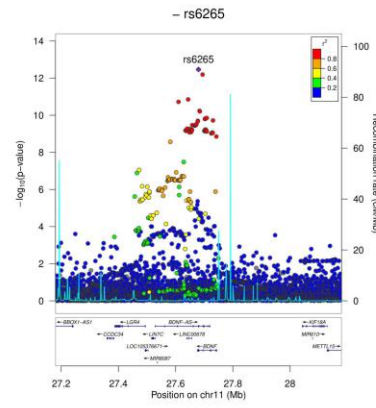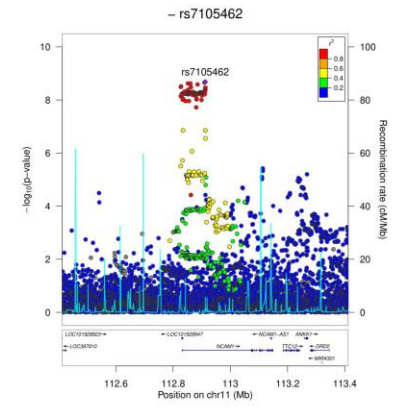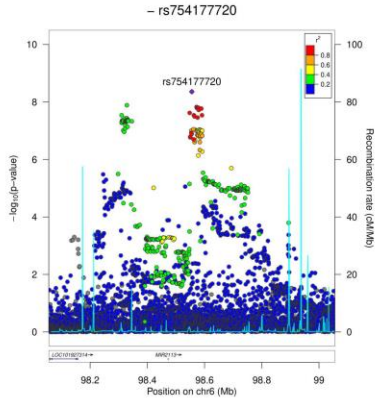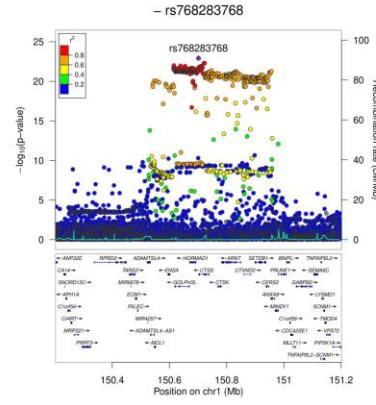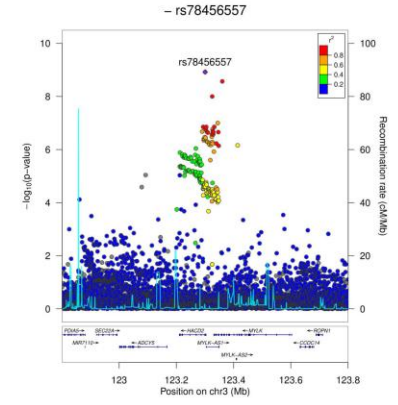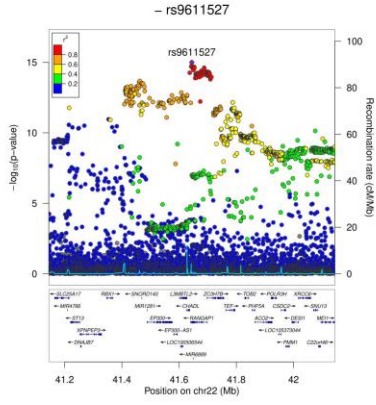



**Figure S6. Locus plots for caffeine from coffee**

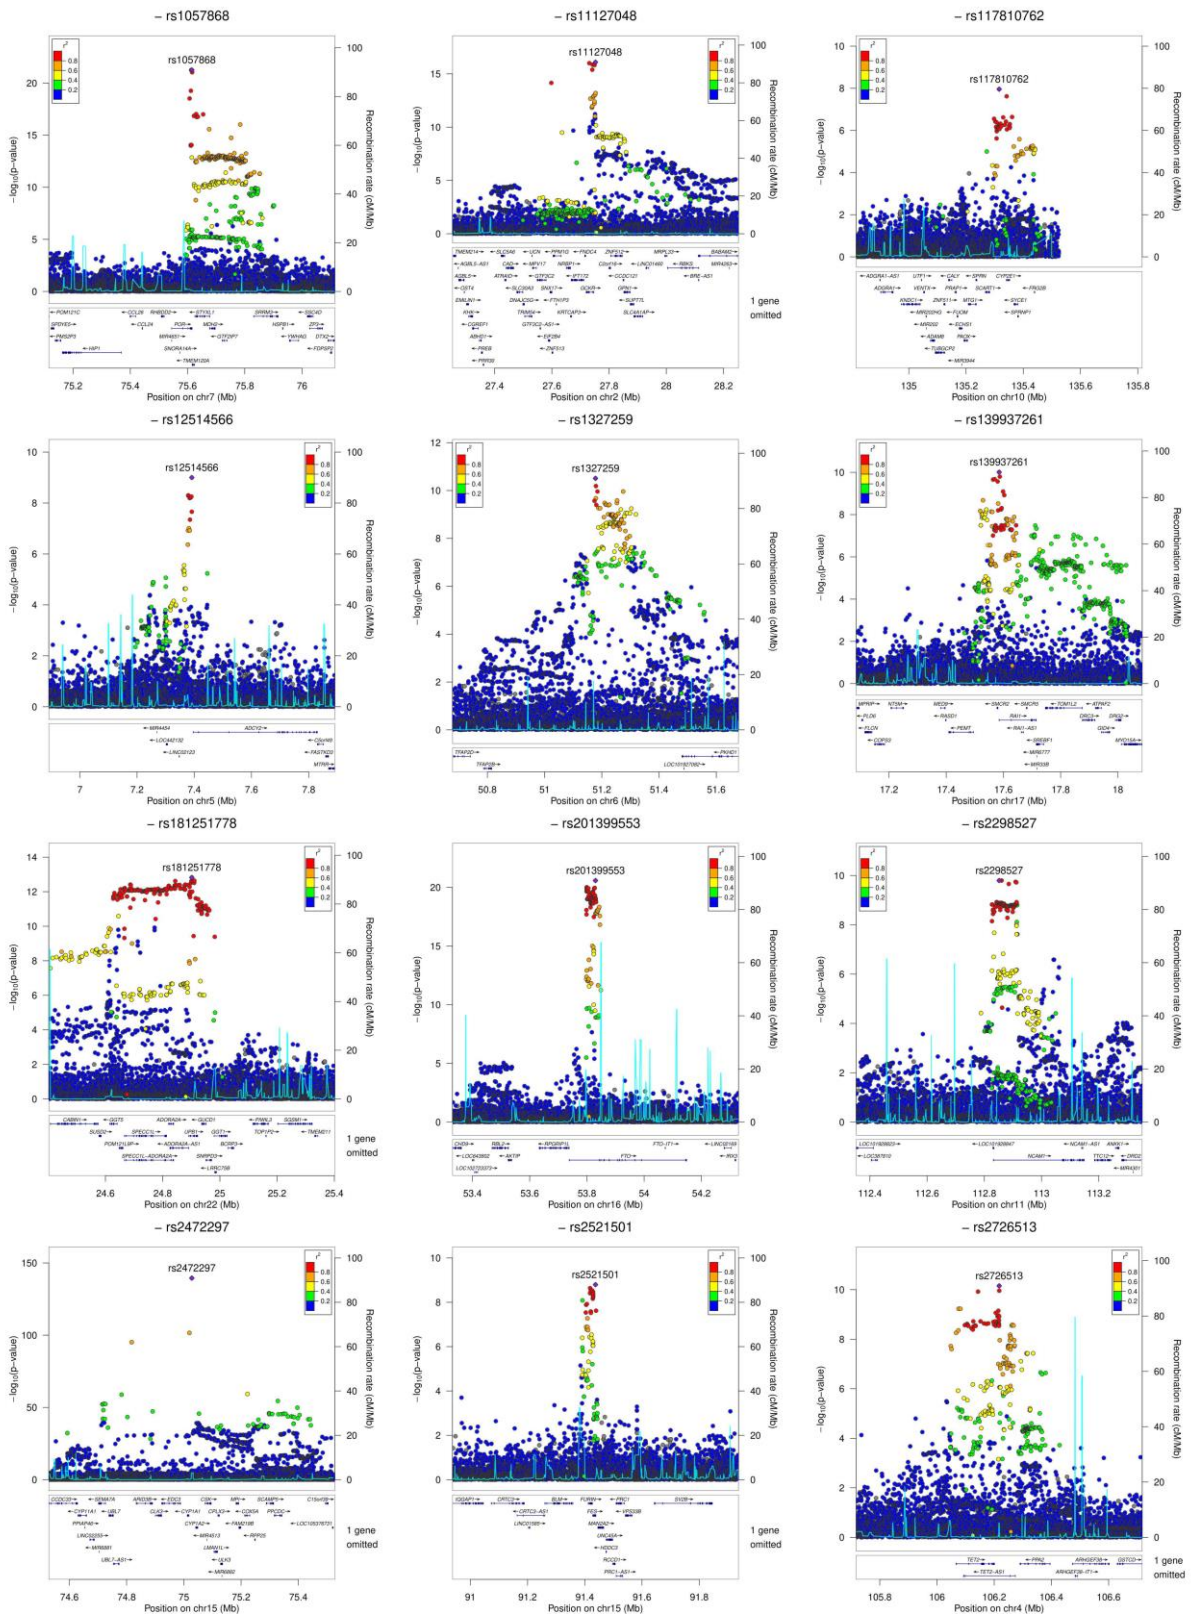

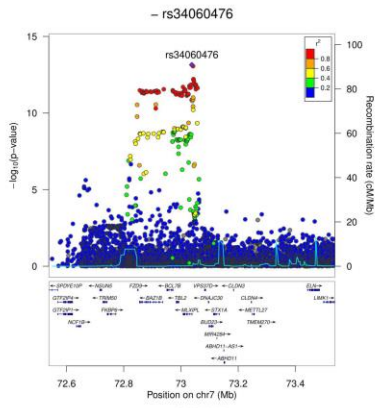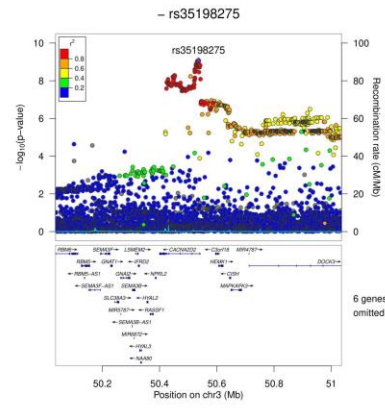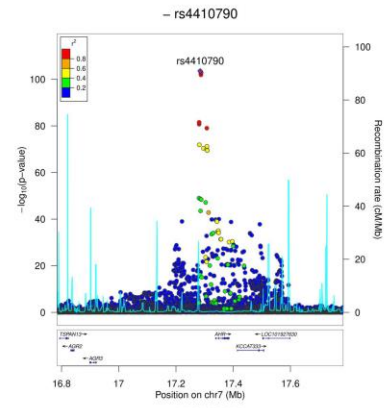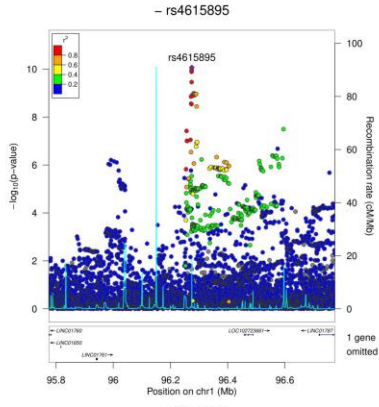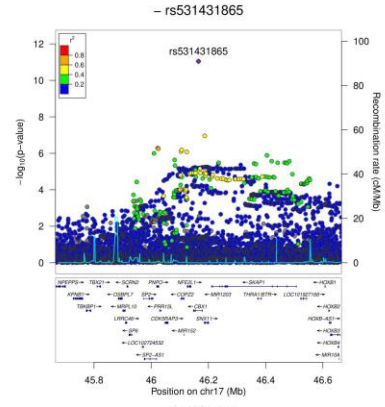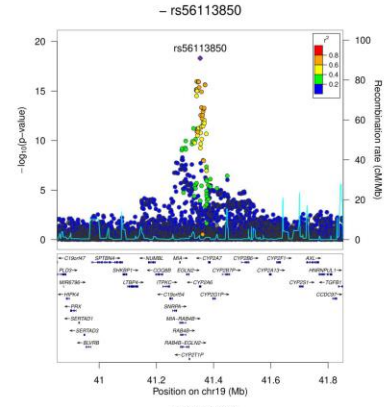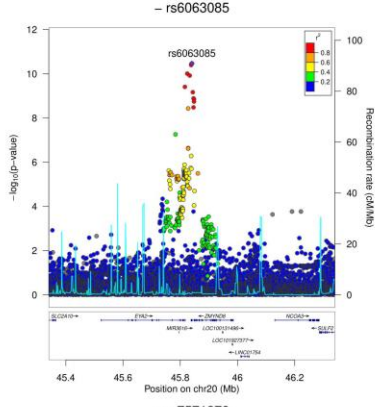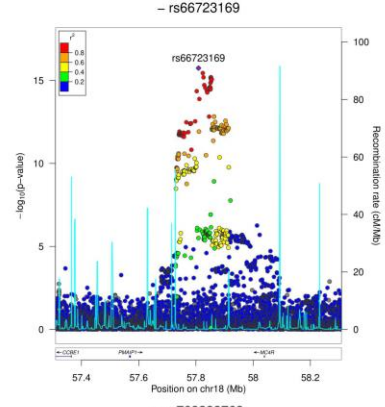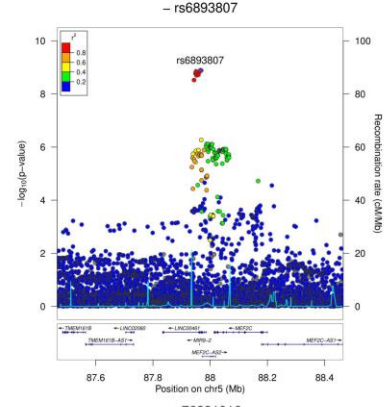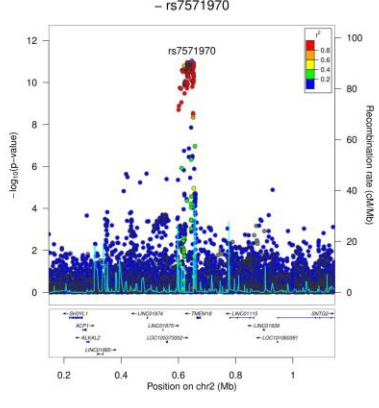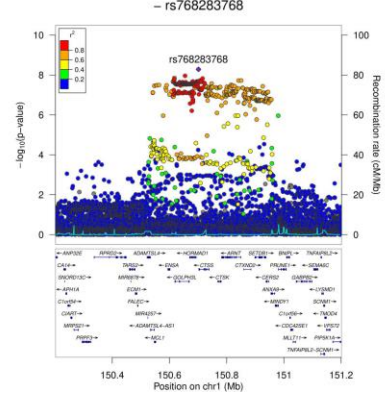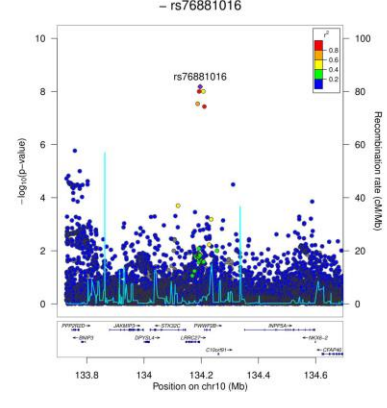

**Figure S7. Locus plots for caffeine from tea**

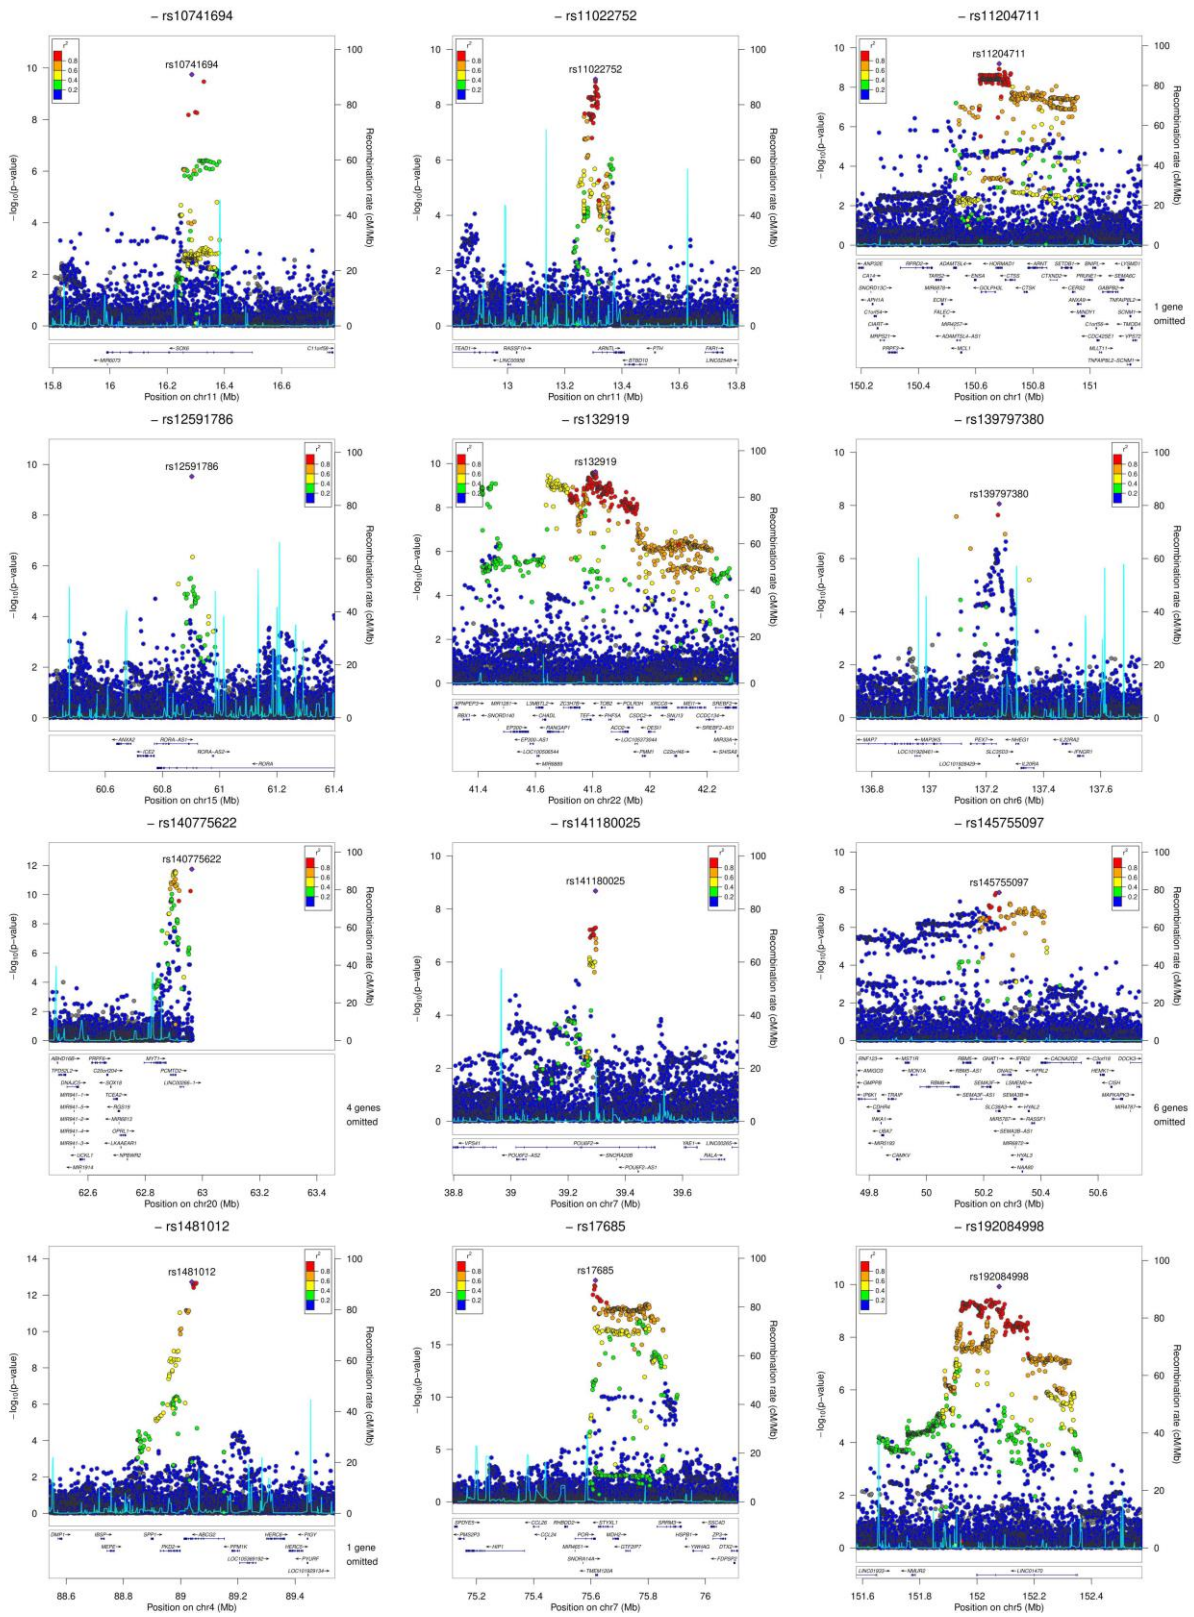

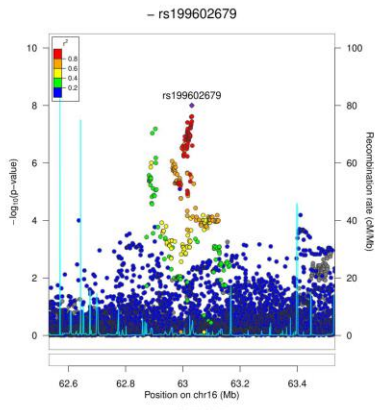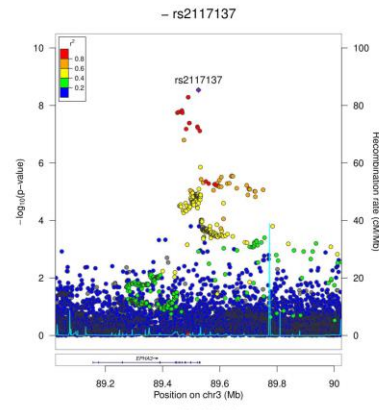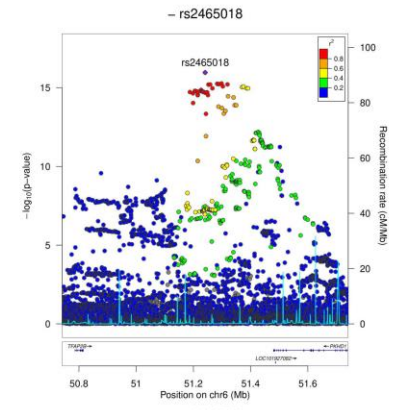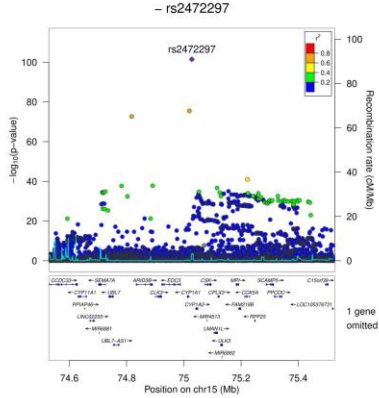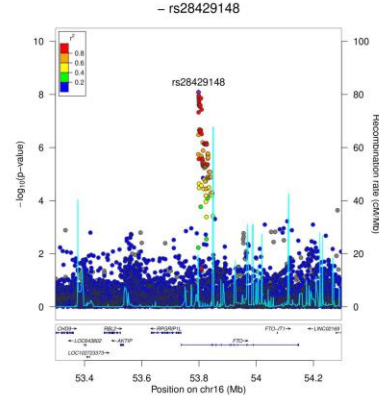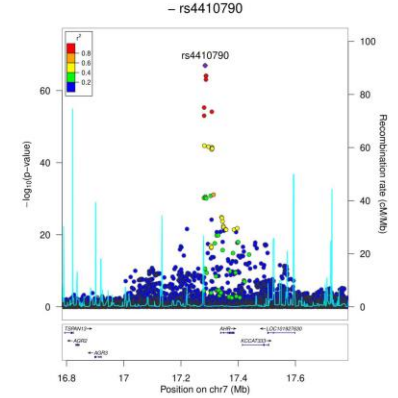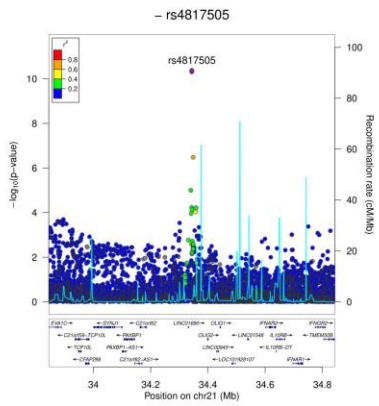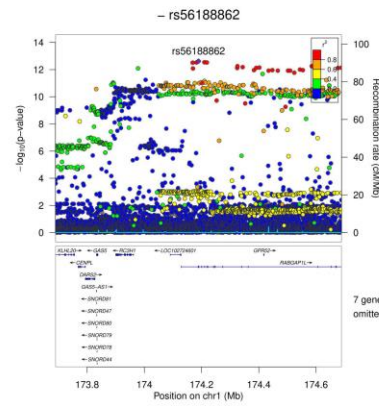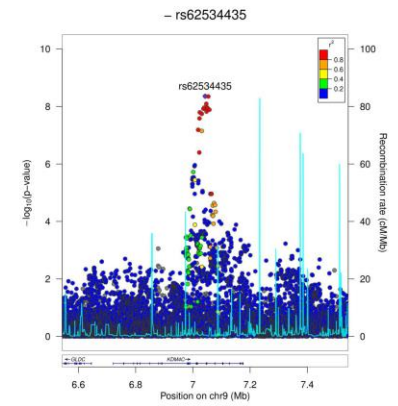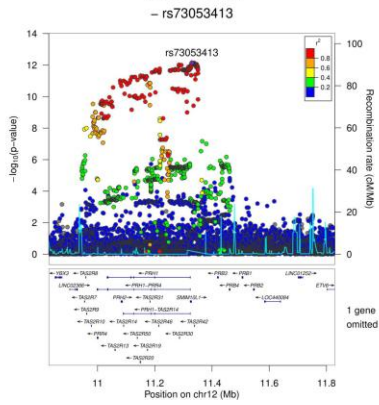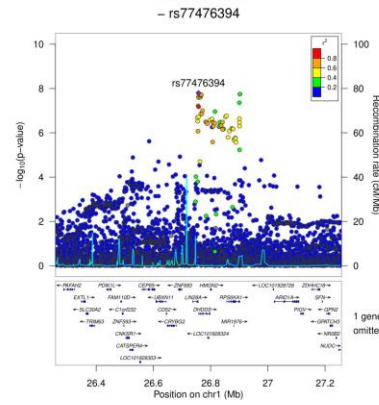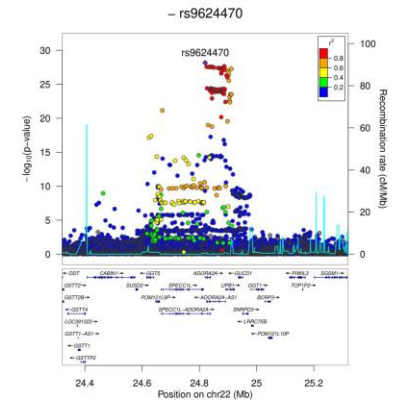

Figure S8. QQ plot for combined caffeine intake

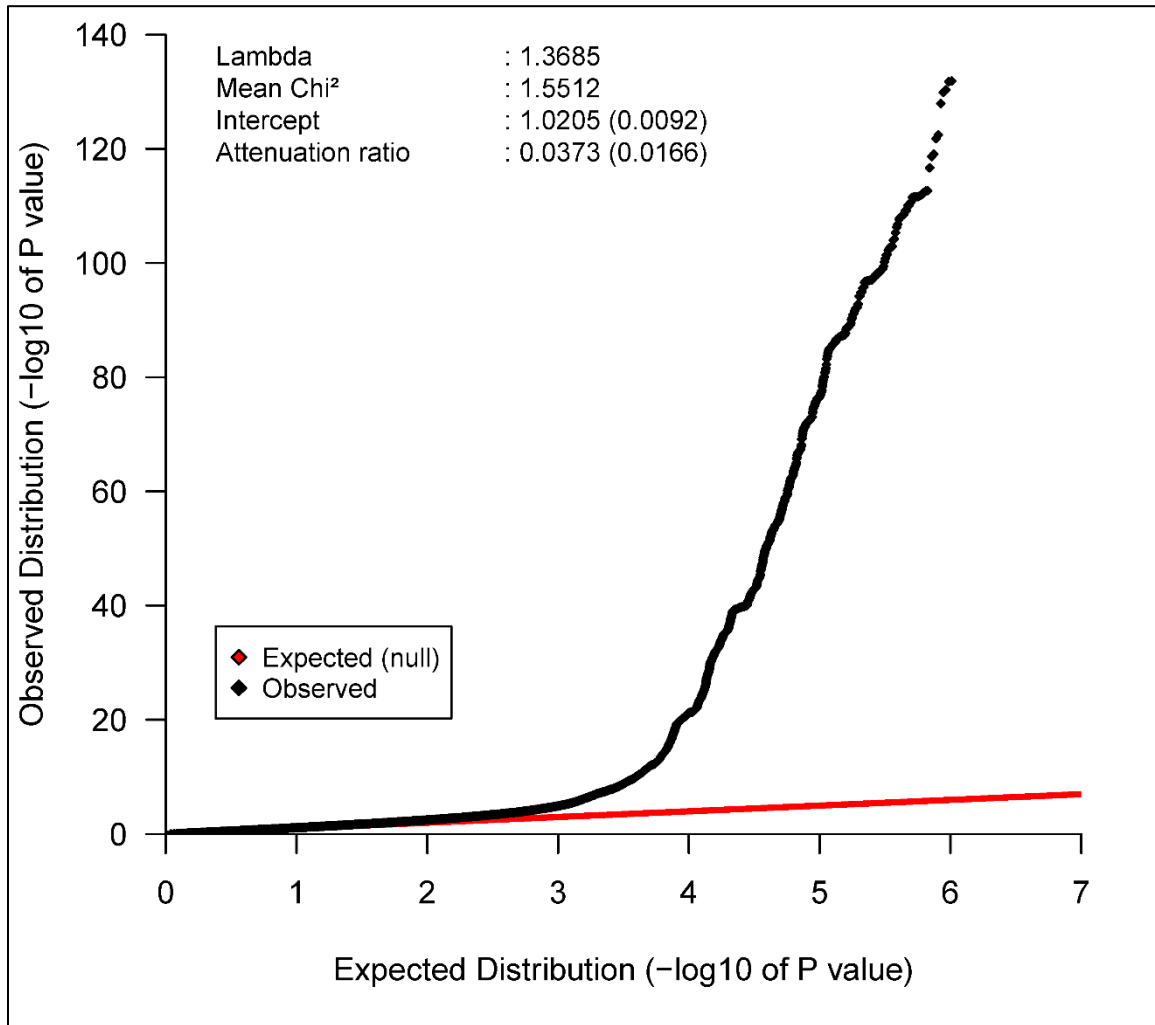

Figure S9. QQ plot for caffeine from coffee

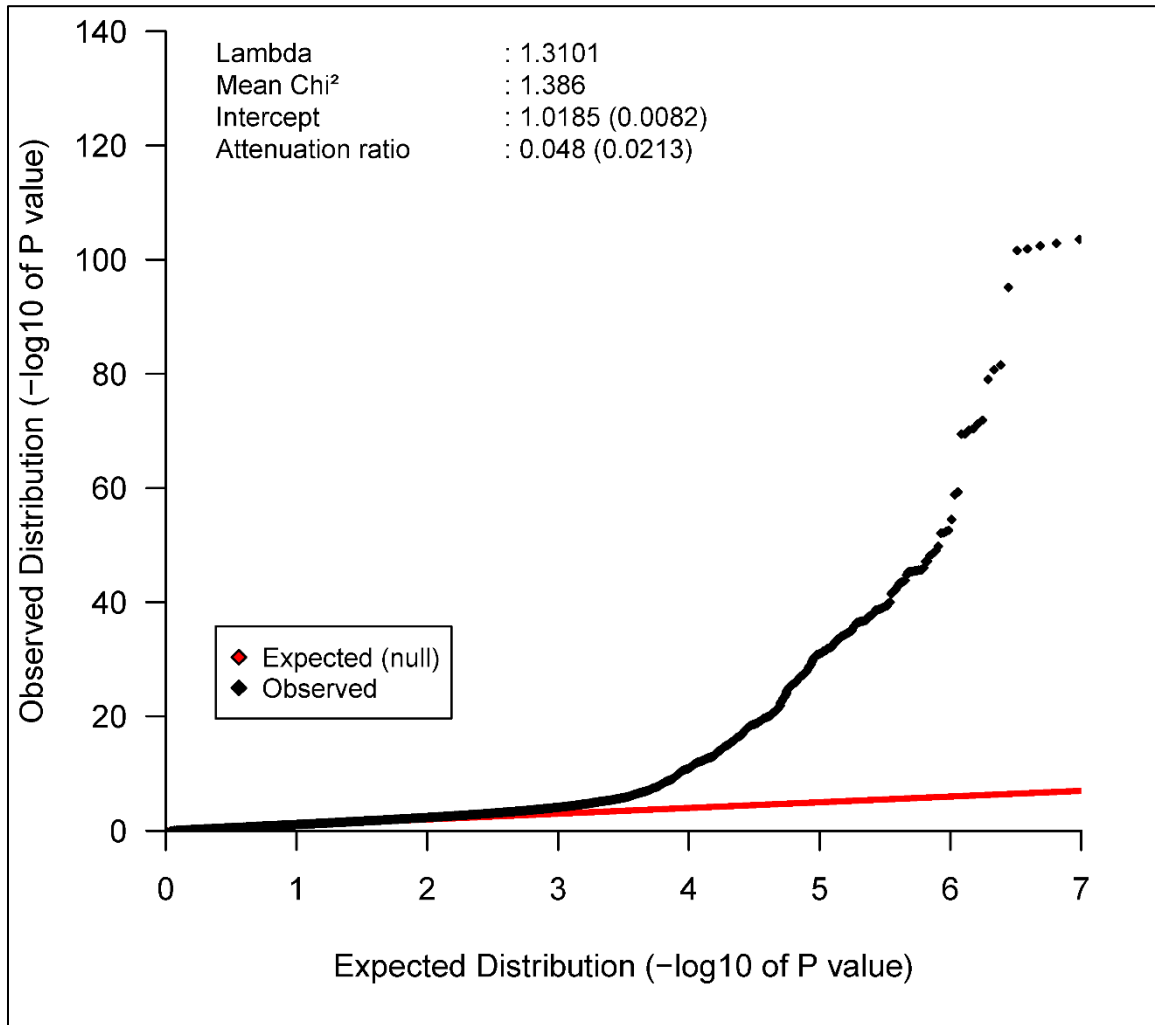

Figure S10. QQ plot for caffeine from tea

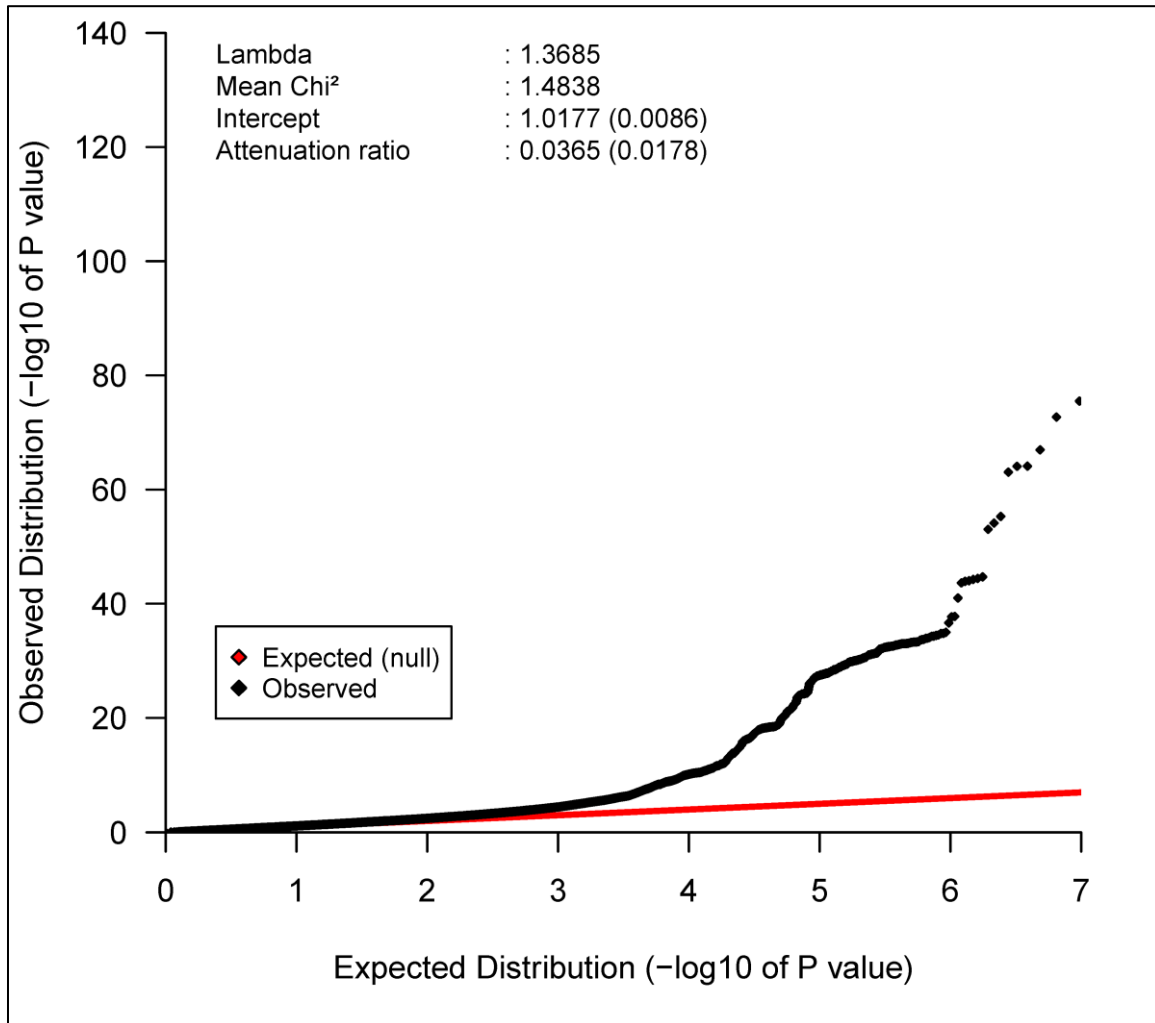

**Figure S11. Forest plot showing individual SNP estimates with CAD for combined caffeine intake**

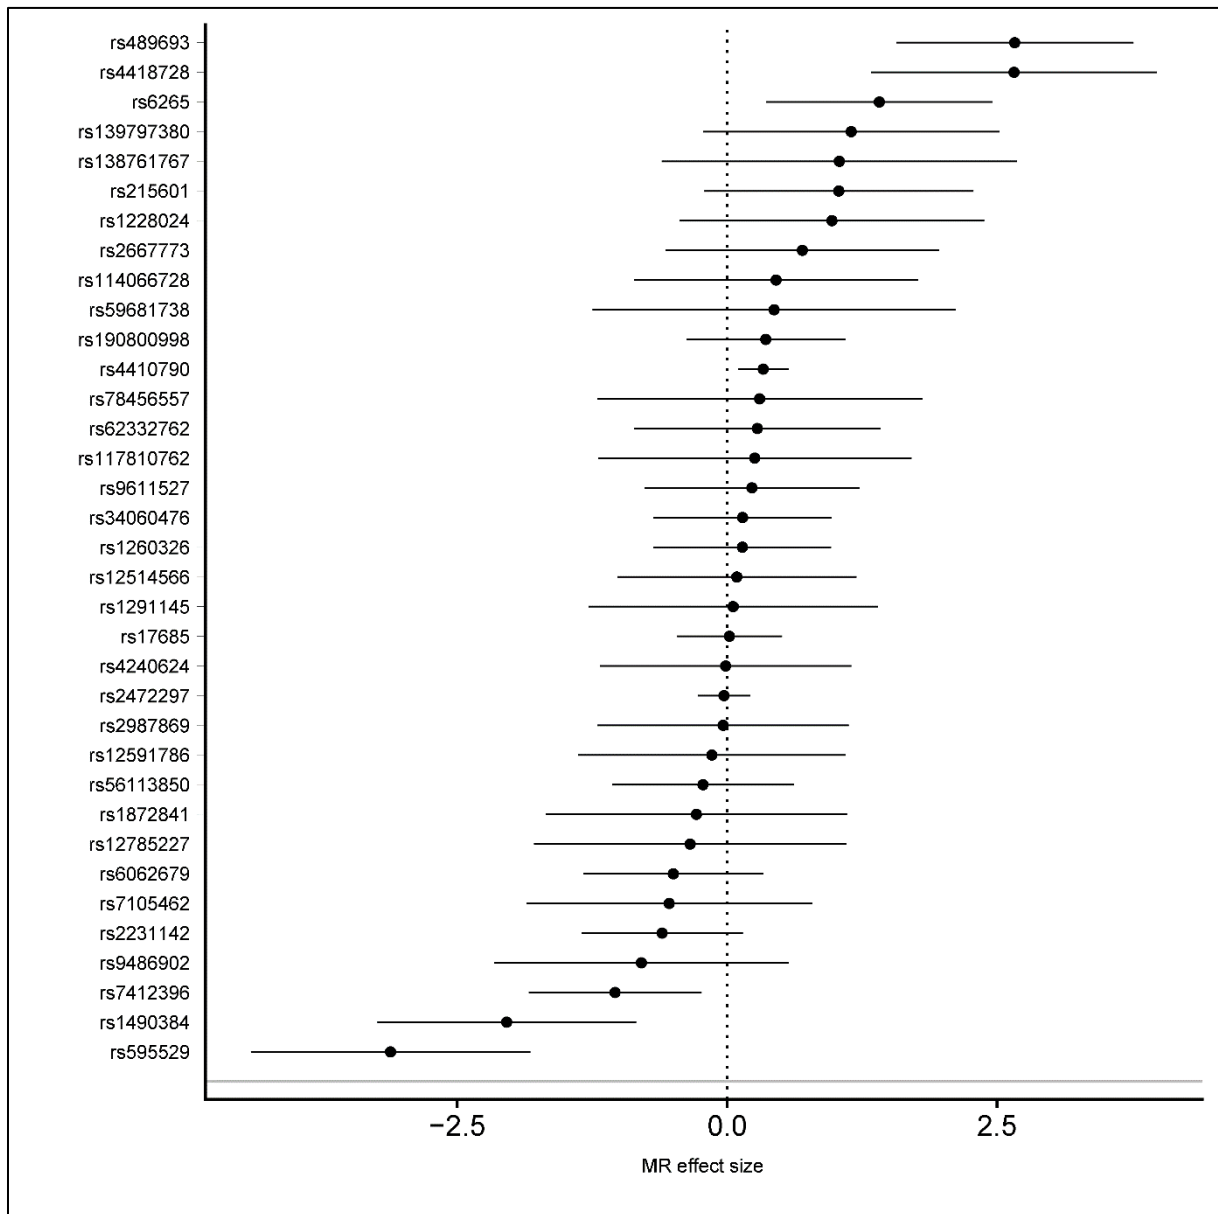



**Figure S12. Forest plot showing individual SNP estimates with CAD for caffeine from coffee**

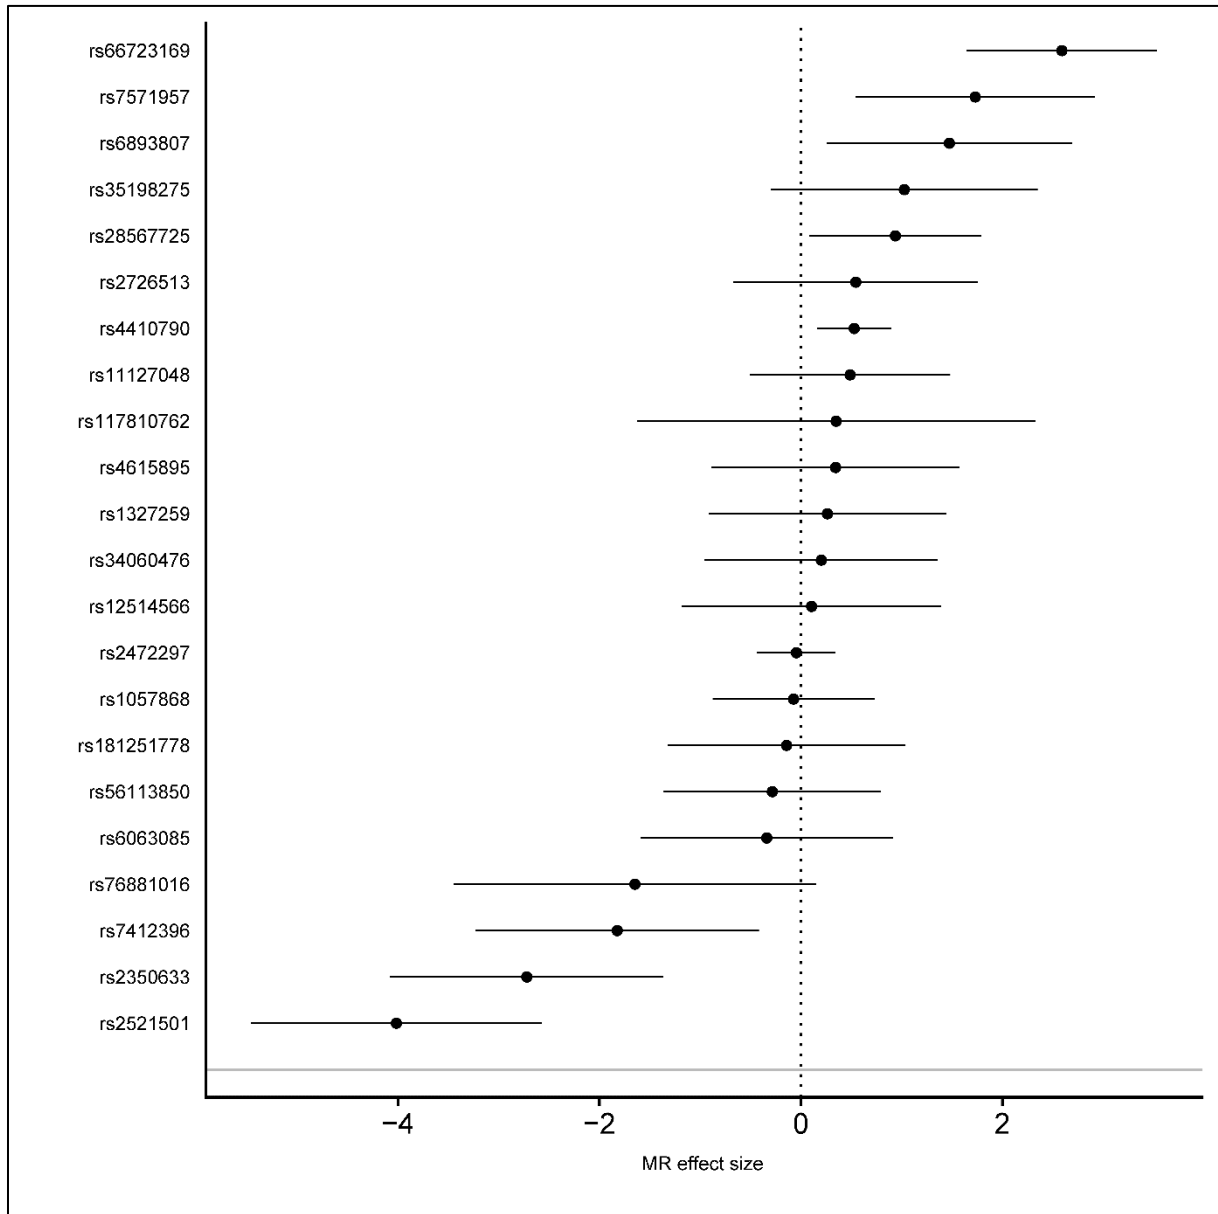

**Figure S13. Forest plot showing individual SNP estimates with CAD for caffeine from tea**

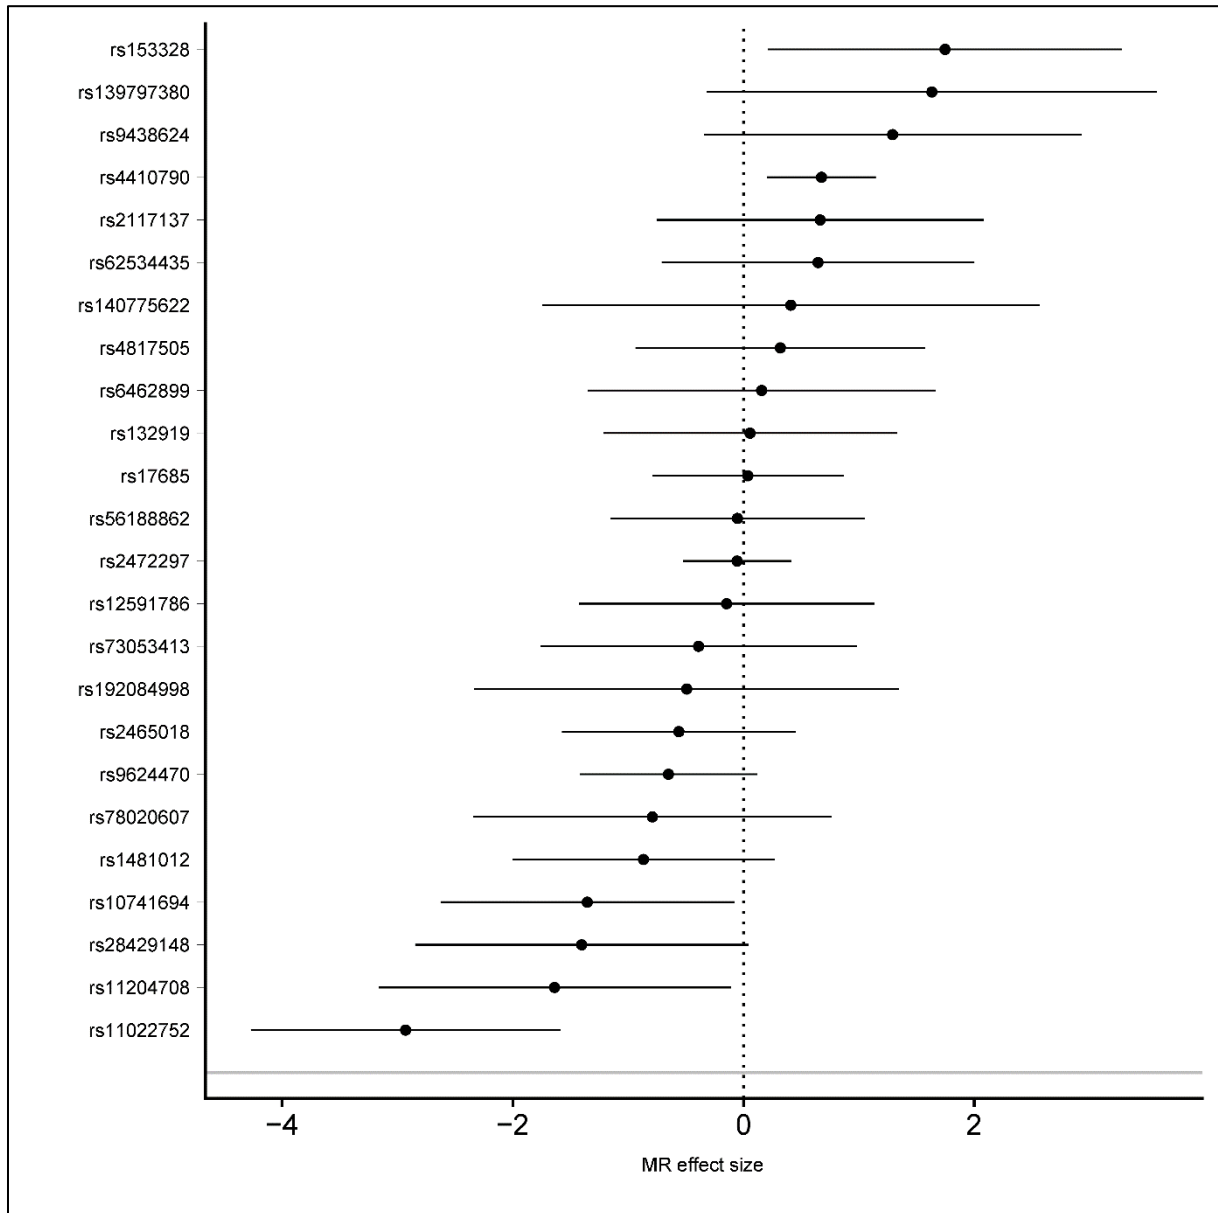

**Figure S14. Forest plot showing individual SNP estimates with T2D for combined caffeine intake**

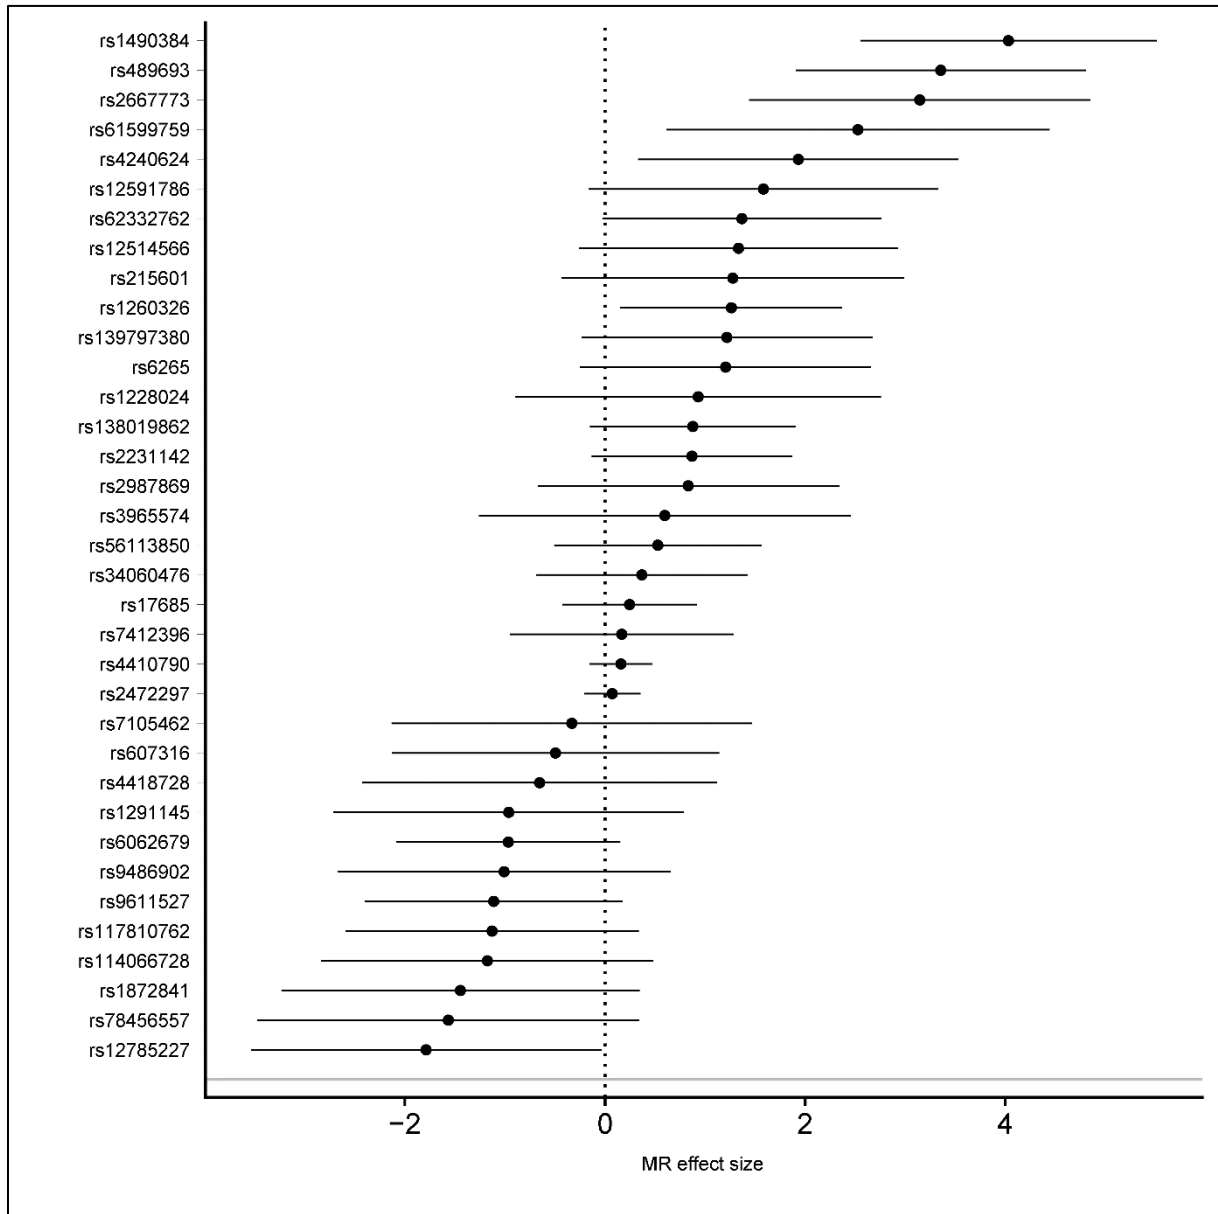

**Figure S15. Forest plot showing individual SNP estimates with T2D for caffeine from coffee**

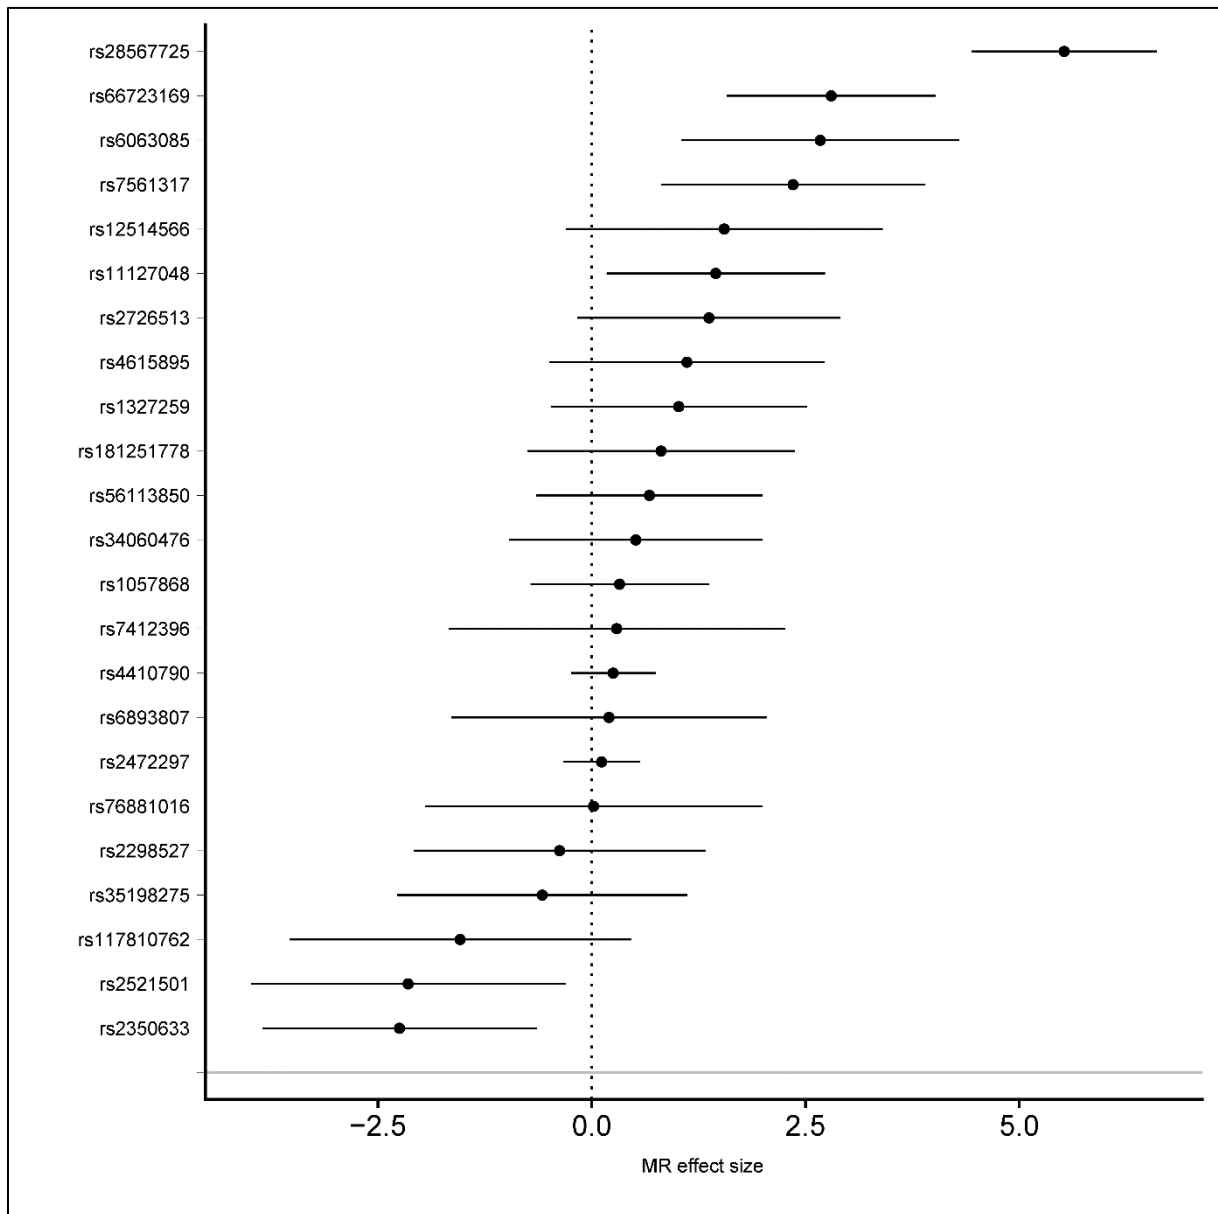

**Figure S16. Forest plot showing individual SNP estimates with T2D for caffeine from tea**

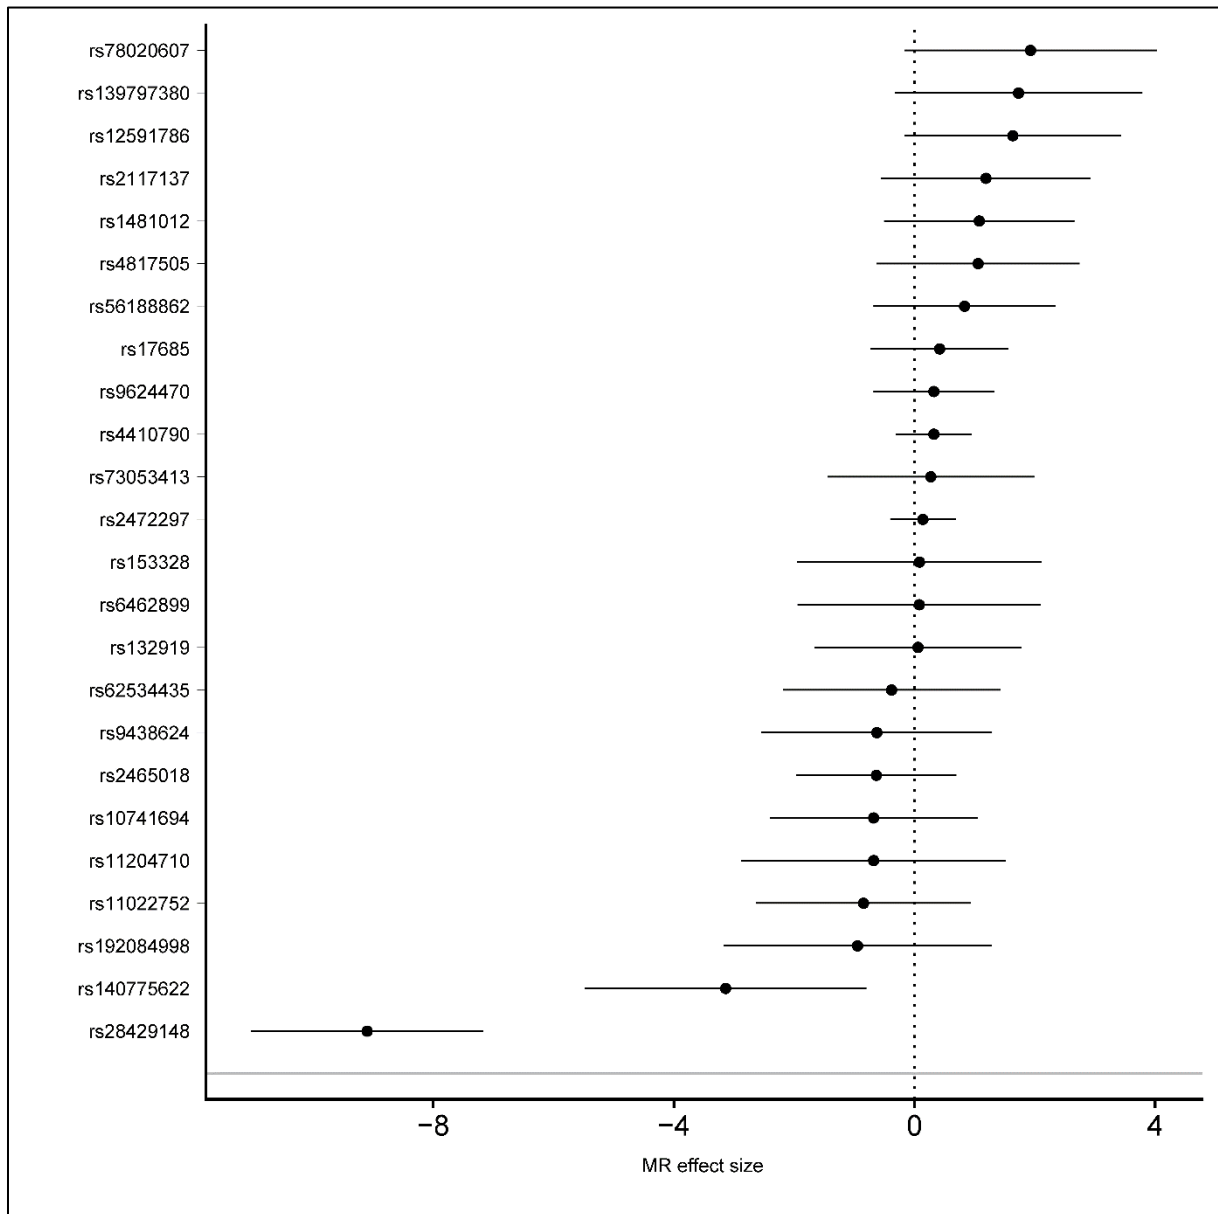

Supplement: JAH3-9-e016808-s001.pdf [file JAH3-9-e016808-s001.pdf]
